# Supplementary material for: Seventeen-year study reveals fluctuations in key ecological indicators on two reef crests in Cuba
Source: PeerJ. 2024 Jan 23;12:e16705. doi: 10.7717/peerj.16705 (PMC10812586; doi:10.7717/peerj.16705)
Supplement: Supplemental Information 4 — Each data point from every survey conducted from 2005 to 2021. [file peerj-12-16705-s004.xlsx]

## Sheet: Density of A.palmata
Year	Reef	Station	Transect	Density of A. palmata (col. 10 m-2)
2005	Playa Baracoa	E1	1	23
2005	Playa Baracoa	E1	2	16
2005	Playa Baracoa	E1	3	15
2005	Playa Baracoa	E1	4	18
2005	Playa Baracoa	E1	5	17
2005	Playa Baracoa	E1	6	9
2005	Playa Baracoa	E1	7	22
2005	Playa Baracoa	E1	8	7
2005	Playa Baracoa	E1	9	13
2005	Playa Baracoa	E1	10	5
2005	Playa Baracoa	E2	1	13
2005	Playa Baracoa	E2	2	15
2005	Playa Baracoa	E2	3	20
2005	Playa Baracoa	E2	4	18
2005	Playa Baracoa	E2	5	17
2005	Playa Baracoa	E2	6	12
2005	Playa Baracoa	E2	7	12
2005	Playa Baracoa	E2	8	10
2005	Playa Baracoa	E2	9	6
2005	Playa Baracoa	E2	10	8
2005	Playa Baracoa	E3	1	34
2005	Playa Baracoa	E3	2	12
2005	Playa Baracoa	E3	3	14
2005	Playa Baracoa	E3	4	10
2005	Playa Baracoa	E3	5	28
2005	Playa Baracoa	E3	6	13
2005	Playa Baracoa	E3	7	32
2005	Playa Baracoa	E3	8	29
2005	Playa Baracoa	E3	9	34
2005	Playa Baracoa	E3	10	51
2005	Playa Baracoa	E4	1	16
2005	Playa Baracoa	E4	2	21
2005	Playa Baracoa	E4	3	20
2005	Playa Baracoa	E4	4	7
2005	Playa Baracoa	E4	5	12
2005	Playa Baracoa	E4	6	17
2005	Playa Baracoa	E4	7	36
2005	Playa Baracoa	E4	8	29
2005	Playa Baracoa	E4	9	22
2005	Playa Baracoa	E4	10	9
2008	Playa Baracoa	E1	1	9
2008	Playa Baracoa	E1	2	5
2008	Playa Baracoa	E1	3	14
2008	Playa Baracoa	E1	4	9
2008	Playa Baracoa	E1	5	25
2008	Playa Baracoa	E1	6	11
2008	Playa Baracoa	E1	7	16
2008	Playa Baracoa	E1	8	8
2008	Playa Baracoa	E1	9	12
2008	Playa Baracoa	E1	10	7
2008	Playa Baracoa	E2	1	29
2008	Playa Baracoa	E2	2	26
2008	Playa Baracoa	E2	3	24
2008	Playa Baracoa	E2	4	27
2008	Playa Baracoa	E2	5	22
2008	Playa Baracoa	E2	6	22
2008	Playa Baracoa	E2	7	14
2008	Playa Baracoa	E2	8	13
2008	Playa Baracoa	E2	9	33
2008	Playa Baracoa	E2	10	34
2008	Playa Baracoa	E3	1	25
2008	Playa Baracoa	E3	2	18
2008	Playa Baracoa	E3	3	23
2008	Playa Baracoa	E3	4	35
2008	Playa Baracoa	E3	5	10
2008	Playa Baracoa	E3	6	11
2008	Playa Baracoa	E3	7	16
2008	Playa Baracoa	E3	8	22
2008	Playa Baracoa	E3	9	27
2008	Playa Baracoa	E3	10	18
2008	Playa Baracoa	E4	1	10
2008	Playa Baracoa	E4	2	18
2008	Playa Baracoa	E4	3	28
2008	Playa Baracoa	E4	4	13
2008	Playa Baracoa	E4	5	13
2008	Playa Baracoa	E4	6	19
2008	Playa Baracoa	E4	7	34
2008	Playa Baracoa	E4	8	24
2008	Playa Baracoa	E4	9	31
2008	Playa Baracoa	E4	10	39
2008	Playa Baracoa	E5	1	30
2008	Playa Baracoa	E5	2	24
2008	Playa Baracoa	E5	3	8
2008	Playa Baracoa	E5	4	17
2008	Playa Baracoa	E5	5	35
2008	Playa Baracoa	E5	6	24
2008	Playa Baracoa	E5	7	36
2008	Playa Baracoa	E5	8	15
2008	Playa Baracoa	E5	9	17
2008	Playa Baracoa	E5	10	18
2008	Playa Baracoa	E6	1	31
2008	Playa Baracoa	E6	2	24
2008	Playa Baracoa	E6	3	25
2008	Playa Baracoa	E6	4	16
2008	Playa Baracoa	E6	5	34
2008	Playa Baracoa	E6	6	44
2008	Playa Baracoa	E6	7	37
2008	Playa Baracoa	E6	8	34
2008	Playa Baracoa	E6	9	21
2008	Playa Baracoa	E6	10	24
2012	Playa Baracoa	E1	1	3
2012	Playa Baracoa	E1	2	3
2012	Playa Baracoa	E1	3	1
2012	Playa Baracoa	E1	4	2
2012	Playa Baracoa	E1	5	2
2012	Playa Baracoa	E1	6	3
2012	Playa Baracoa	E1	7	0
2012	Playa Baracoa	E1	8	2
2012	Playa Baracoa	E1	9	0
2012	Playa Baracoa	E1	10	0
2012	Playa Baracoa	E2	1	2
2012	Playa Baracoa	E2	2	1
2012	Playa Baracoa	E2	3	2
2012	Playa Baracoa	E2	4	4
2012	Playa Baracoa	E2	5	3
2012	Playa Baracoa	E2	6	4
2012	Playa Baracoa	E2	7	2
2012	Playa Baracoa	E2	8	1
2012	Playa Baracoa	E2	9	0
2012	Playa Baracoa	E2	10	1
2012	Playa Baracoa	E3	1	4
2012	Playa Baracoa	E3	2	1
2012	Playa Baracoa	E3	3	4
2012	Playa Baracoa	E3	4	2
2012	Playa Baracoa	E3	5	1
2012	Playa Baracoa	E3	6	6
2012	Playa Baracoa	E3	7	1
2012	Playa Baracoa	E3	8	4
2012	Playa Baracoa	E3	9	4
2012	Playa Baracoa	E3	10	4
2012	Playa Baracoa	E4	1	2
2012	Playa Baracoa	E4	2	4
2012	Playa Baracoa	E4	3	3
2012	Playa Baracoa	E4	4	2
2012	Playa Baracoa	E4	5	1
2012	Playa Baracoa	E4	6	2
2012	Playa Baracoa	E4	7	13
2012	Playa Baracoa	E4	8	10
2012	Playa Baracoa	E4	9	8
2012	Playa Baracoa	E4	10	3
2012	Playa Baracoa	E5	1	9
2012	Playa Baracoa	E5	2	15
2012	Playa Baracoa	E5	3	2
2012	Playa Baracoa	E5	4	11
2012	Playa Baracoa	E5	5	22
2012	Playa Baracoa	E5	6	2
2012	Playa Baracoa	E5	7	1
2012	Playa Baracoa	E5	8	1
2012	Playa Baracoa	E5	9	7
2012	Playa Baracoa	E5	10	0
2013	Playa Baracoa	E1	1	5
2013	Playa Baracoa	E1	2	13
2013	Playa Baracoa	E1	3	12
2013	Playa Baracoa	E1	4	16
2013	Playa Baracoa	E1	5	11
2013	Playa Baracoa	E1	6	6
2013	Playa Baracoa	E1	7	19
2013	Playa Baracoa	E1	8	1
2013	Playa Baracoa	E1	9	4
2013	Playa Baracoa	E1	10	0
2013	Playa Baracoa	E2	1	20
2013	Playa Baracoa	E2	2	8
2013	Playa Baracoa	E2	3	8
2013	Playa Baracoa	E2	4	3
2013	Playa Baracoa	E2	5	25
2013	Playa Baracoa	E2	6	24
2013	Playa Baracoa	E2	7	18
2013	Playa Baracoa	E2	8	10
2013	Playa Baracoa	E2	9	7
2013	Playa Baracoa	E2	10	12
2013	Playa Baracoa	E3	1	8
2013	Playa Baracoa	E3	2	1
2013	Playa Baracoa	E3	3	3
2013	Playa Baracoa	E3	4	7
2013	Playa Baracoa	E3	5	1
2013	Playa Baracoa	E3	6	2
2013	Playa Baracoa	E3	7	7
2013	Playa Baracoa	E3	8	8
2013	Playa Baracoa	E3	9	1
2013	Playa Baracoa	E3	10	0
2013	Playa Baracoa	E4	1	11
2013	Playa Baracoa	E4	2	12
2013	Playa Baracoa	E4	3	10
2013	Playa Baracoa	E4	4	21
2013	Playa Baracoa	E4	5	0
2013	Playa Baracoa	E4	6	9
2013	Playa Baracoa	E4	7	20
2013	Playa Baracoa	E4	8	2
2013	Playa Baracoa	E4	9	18
2013	Playa Baracoa	E4	10	0
2013	Playa Baracoa	E5	1	5
2013	Playa Baracoa	E5	2	5
2013	Playa Baracoa	E5	3	0
2013	Playa Baracoa	E5	4	3
2013	Playa Baracoa	E5	5	6
2013	Playa Baracoa	E5	6	8
2013	Playa Baracoa	E5	7	2
2013	Playa Baracoa	E5	8	2
2013	Playa Baracoa	E5	9	31
2013	Playa Baracoa	E5	10	6
2015	Playa Baracoa	E1	1	3
2015	Playa Baracoa	E1	2	7
2015	Playa Baracoa	E1	3	4
2015	Playa Baracoa	E1	4	12
2015	Playa Baracoa	E1	5	8
2015	Playa Baracoa	E1	6	10
2015	Playa Baracoa	E1	7	7
2015	Playa Baracoa	E1	8	14
2015	Playa Baracoa	E1	9	7
2015	Playa Baracoa	E1	10	3
2015	Playa Baracoa	E2	1	6
2015	Playa Baracoa	E2	2	6
2015	Playa Baracoa	E2	3	3
2015	Playa Baracoa	E2	4	4
2015	Playa Baracoa	E2	5	14
2015	Playa Baracoa	E2	6	6
2015	Playa Baracoa	E2	7	3
2015	Playa Baracoa	E2	8	3
2015	Playa Baracoa	E2	9	2
2015	Playa Baracoa	E2	10	1
2015	Playa Baracoa	E3	1	0
2015	Playa Baracoa	E3	2	4
2015	Playa Baracoa	E3	3	7
2015	Playa Baracoa	E3	4	8
2015	Playa Baracoa	E3	5	9
2015	Playa Baracoa	E3	6	7
2015	Playa Baracoa	E3	7	5
2015	Playa Baracoa	E3	8	1
2015	Playa Baracoa	E3	9	5
2015	Playa Baracoa	E3	10	11
2015	Playa Baracoa	E4	1	12
2015	Playa Baracoa	E4	2	7
2015	Playa Baracoa	E4	3	1
2015	Playa Baracoa	E4	4	7
2015	Playa Baracoa	E4	5	4
2015	Playa Baracoa	E4	6	8
2015	Playa Baracoa	E4	7	4
2015	Playa Baracoa	E4	8	10
2015	Playa Baracoa	E4	9	7
2015	Playa Baracoa	E4	10	5
2015	Playa Baracoa	E5	1	10
2015	Playa Baracoa	E5	2	16
2015	Playa Baracoa	E5	3	8
2015	Playa Baracoa	E5	4	5
2015	Playa Baracoa	E5	5	12
2015	Playa Baracoa	E5	6	4
2015	Playa Baracoa	E5	7	11
2015	Playa Baracoa	E5	8	3
2015	Playa Baracoa	E5	9	10
2015	Playa Baracoa	E5	10	2
2015	Playa Baracoa	E6	1	30
2015	Playa Baracoa	E6	2	7
2015	Playa Baracoa	E6	3	15
2015	Playa Baracoa	E6	4	17
2015	Playa Baracoa	E6	5	14
2015	Playa Baracoa	E6	6	11
2015	Playa Baracoa	E6	7	5
2015	Playa Baracoa	E6	8	1
2015	Playa Baracoa	E6	9	3
2015	Playa Baracoa	E6	10	7
2017	Playa Baracoa	E1	1	47
2017	Playa Baracoa	E1	2	3
2017	Playa Baracoa	E1	3	9
2017	Playa Baracoa	E1	4	10
2017	Playa Baracoa	E1	5	6
2017	Playa Baracoa	E1	6	6
2017	Playa Baracoa	E1	7	16
2017	Playa Baracoa	E1	8	11
2017	Playa Baracoa	E1	9	25
2017	Playa Baracoa	E1	10	6
2017	Playa Baracoa	E2	1	7
2017	Playa Baracoa	E2	2	51
2017	Playa Baracoa	E2	3	19
2017	Playa Baracoa	E2	4	3
2017	Playa Baracoa	E2	5	33
2017	Playa Baracoa	E2	6	9
2017	Playa Baracoa	E2	7	2
2017	Playa Baracoa	E2	8	19
2017	Playa Baracoa	E2	9	4
2017	Playa Baracoa	E2	10	40
2017	Playa Baracoa	E3	1	15
2017	Playa Baracoa	E3	2	3
2017	Playa Baracoa	E3	3	16
2017	Playa Baracoa	E3	4	0
2017	Playa Baracoa	E3	5	3
2017	Playa Baracoa	E3	6	2
2017	Playa Baracoa	E3	7	19
2017	Playa Baracoa	E3	8	13
2017	Playa Baracoa	E3	9	2
2017	Playa Baracoa	E3	10	20
2017	Playa Baracoa	E4	1	3
2017	Playa Baracoa	E4	2	3
2017	Playa Baracoa	E4	3	13
2017	Playa Baracoa	E4	4	5
2017	Playa Baracoa	E4	5	39
2017	Playa Baracoa	E4	6	7
2017	Playa Baracoa	E4	7	12
2017	Playa Baracoa	E4	8	11
2017	Playa Baracoa	E4	9	14
2017	Playa Baracoa	E4	10	7
2017	Playa Baracoa	E5	1	4
2017	Playa Baracoa	E5	2	19
2017	Playa Baracoa	E5	3	8
2017	Playa Baracoa	E5	4	14
2017	Playa Baracoa	E5	5	17
2017	Playa Baracoa	E5	6	19
2017	Playa Baracoa	E5	7	11
2017	Playa Baracoa	E5	8	9
2017	Playa Baracoa	E5	9	6
2017	Playa Baracoa	E5	10	7
2017	Playa Baracoa	E6	1	6
2017	Playa Baracoa	E6	2	2
2017	Playa Baracoa	E6	3	15
2017	Playa Baracoa	E6	4	10
2017	Playa Baracoa	E6	5	15
2017	Playa Baracoa	E6	6	18
2017	Playa Baracoa	E6	7	9
2017	Playa Baracoa	E6	8	10
2017	Playa Baracoa	E6	9	7
2017	Playa Baracoa	E6	10	3
2021	Playa Baracoa	E1	1	0
2021	Playa Baracoa	E1	2	2
2021	Playa Baracoa	E1	3	0
2021	Playa Baracoa	E1	4	0
2021	Playa Baracoa	E1	5	0
2021	Playa Baracoa	E1	6	2
2021	Playa Baracoa	E1	7	0
2021	Playa Baracoa	E1	8	0
2021	Playa Baracoa	E1	9	0
2021	Playa Baracoa	E1	10	0
2021	Playa Baracoa	E2	1	2
2021	Playa Baracoa	E2	2	0
2021	Playa Baracoa	E2	3	0
2021	Playa Baracoa	E2	4	10
2021	Playa Baracoa	E2	5	1
2021	Playa Baracoa	E2	6	0
2021	Playa Baracoa	E2	7	0
2021	Playa Baracoa	E2	8	4
2021	Playa Baracoa	E2	9	3
2021	Playa Baracoa	E2	10	0
2021	Playa Baracoa	E3	1	1
2021	Playa Baracoa	E3	2	8
2021	Playa Baracoa	E3	3	0
2021	Playa Baracoa	E3	4	8
2021	Playa Baracoa	E3	5	1
2021	Playa Baracoa	E3	6	0
2021	Playa Baracoa	E3	7	2
2021	Playa Baracoa	E3	8	17
2021	Playa Baracoa	E3	9	5
2021	Playa Baracoa	E3	10	1
2021	Playa Baracoa	E4	1	2
2021	Playa Baracoa	E4	2	0
2021	Playa Baracoa	E4	3	0
2021	Playa Baracoa	E4	4	2
2021	Playa Baracoa	E4	5	0
2021	Playa Baracoa	E4	6	1
2021	Playa Baracoa	E4	7	0
2021	Playa Baracoa	E4	8	10
2021	Playa Baracoa	E4	9	0
2021	Playa Baracoa	E4	10	0
2021	Playa Baracoa	E5	1	13
2021	Playa Baracoa	E5	2	0
2021	Playa Baracoa	E5	3	0
2021	Playa Baracoa	E5	4	0
2021	Playa Baracoa	E5	5	1
2021	Playa Baracoa	E5	6	5
2021	Playa Baracoa	E5	7	0
2021	Playa Baracoa	E5	8	0
2021	Playa Baracoa	E5	9	0
2021	Playa Baracoa	E5	10	0
2021	Playa Baracoa	E6	1	0
2021	Playa Baracoa	E6	2	3
2021	Playa Baracoa	E6	3	3
2021	Playa Baracoa	E6	4	0
2021	Playa Baracoa	E6	5	0
2021	Playa Baracoa	E6	6	2
2021	Playa Baracoa	E6	7	0
2021	Playa Baracoa	E6	8	0
2021	Playa Baracoa	E6	9	0
2021	Playa Baracoa	E6	10	0
2008	Rincon de Guanabo	E1	1	20
2008	Rincon de Guanabo	E1	2	31
2008	Rincon de Guanabo	E1	3	11
2008	Rincon de Guanabo	E1	4	8
2008	Rincon de Guanabo	E1	5	26
2008	Rincon de Guanabo	E1	6	30
2008	Rincon de Guanabo	E1	7	20
2008	Rincon de Guanabo	E1	8	26
2008	Rincon de Guanabo	E1	9	31
2008	Rincon de Guanabo	E1	10	26
2008	Rincon de Guanabo	E2	1	36
2008	Rincon de Guanabo	E2	2	42
2008	Rincon de Guanabo	E2	3	57
2008	Rincon de Guanabo	E2	4	57
2008	Rincon de Guanabo	E2	5	28
2008	Rincon de Guanabo	E2	6	21
2008	Rincon de Guanabo	E2	7	33
2008	Rincon de Guanabo	E2	8	23
2008	Rincon de Guanabo	E2	9	24
2008	Rincon de Guanabo	E2	10	28
2008	Rincon de Guanabo	E3	1	48
2008	Rincon de Guanabo	E3	2	42
2008	Rincon de Guanabo	E3	3	29
2008	Rincon de Guanabo	E3	4	42
2008	Rincon de Guanabo	E3	5	66
2008	Rincon de Guanabo	E3	6	34
2008	Rincon de Guanabo	E3	7	28
2008	Rincon de Guanabo	E3	8	36
2008	Rincon de Guanabo	E3	9	28
2008	Rincon de Guanabo	E3	10	25
2008	Rincon de Guanabo	E4	1	26
2008	Rincon de Guanabo	E4	2	5
2008	Rincon de Guanabo	E4	3	13
2008	Rincon de Guanabo	E4	4	17
2008	Rincon de Guanabo	E4	5	15
2008	Rincon de Guanabo	E4	6	40
2008	Rincon de Guanabo	E4	7	14
2008	Rincon de Guanabo	E4	8	21
2008	Rincon de Guanabo	E4	9	36
2008	Rincon de Guanabo	E4	10	23
2008	Rincon de Guanabo	E5	1	14
2008	Rincon de Guanabo	E5	2	19
2008	Rincon de Guanabo	E5	3	12
2008	Rincon de Guanabo	E5	4	43
2008	Rincon de Guanabo	E5	5	30
2008	Rincon de Guanabo	E5	6	18
2008	Rincon de Guanabo	E5	7	16
2008	Rincon de Guanabo	E5	8	17
2008	Rincon de Guanabo	E5	9	18
2008	Rincon de Guanabo	E5	10	8
2008	Rincon de Guanabo	E6	1	5
2008	Rincon de Guanabo	E6	2	25
2008	Rincon de Guanabo	E6	3	17
2008	Rincon de Guanabo	E6	4	44
2008	Rincon de Guanabo	E6	5	30
2008	Rincon de Guanabo	E6	6	6
2008	Rincon de Guanabo	E6	7	38
2008	Rincon de Guanabo	E6	8	27
2008	Rincon de Guanabo	E6	9	35
2008	Rincon de Guanabo	E6	10	29
2015	Rincon de Guanabo	E1	1	12
2015	Rincon de Guanabo	E1	2	18
2015	Rincon de Guanabo	E1	3	15
2015	Rincon de Guanabo	E1	4	14
2015	Rincon de Guanabo	E1	5	21
2015	Rincon de Guanabo	E1	6	40
2015	Rincon de Guanabo	E1	7	15
2015	Rincon de Guanabo	E1	8	9
2015	Rincon de Guanabo	E1	9	24
2015	Rincon de Guanabo	E1	10	32
2015	Rincon de Guanabo	E2	1	28
2015	Rincon de Guanabo	E2	2	18
2015	Rincon de Guanabo	E2	3	44
2015	Rincon de Guanabo	E2	4	25
2015	Rincon de Guanabo	E2	5	27
2015	Rincon de Guanabo	E2	6	38
2015	Rincon de Guanabo	E2	7	15
2015	Rincon de Guanabo	E2	8	40
2015	Rincon de Guanabo	E2	9	30
2015	Rincon de Guanabo	E2	10	24
2015	Rincon de Guanabo	E3	1	9
2015	Rincon de Guanabo	E3	2	14
2015	Rincon de Guanabo	E3	3	9
2015	Rincon de Guanabo	E3	4	5
2015	Rincon de Guanabo	E3	5	23
2015	Rincon de Guanabo	E3	6	25
2015	Rincon de Guanabo	E3	7	18
2015	Rincon de Guanabo	E3	8	36
2015	Rincon de Guanabo	E3	9	30
2015	Rincon de Guanabo	E3	10	22
2015	Rincon de Guanabo	E4	1	5
2015	Rincon de Guanabo	E4	2	10
2015	Rincon de Guanabo	E4	3	28
2015	Rincon de Guanabo	E4	4	58
2015	Rincon de Guanabo	E4	5	45
2015	Rincon de Guanabo	E4	6	27
2015	Rincon de Guanabo	E4	7	23
2015	Rincon de Guanabo	E4	8	26
2015	Rincon de Guanabo	E4	9	43
2015	Rincon de Guanabo	E4	10	65
2015	Rincon de Guanabo	E5	1	22
2015	Rincon de Guanabo	E5	2	21
2015	Rincon de Guanabo	E5	3	19
2015	Rincon de Guanabo	E5	4	18
2015	Rincon de Guanabo	E5	5	20
2015	Rincon de Guanabo	E5	6	5
2015	Rincon de Guanabo	E5	7	15
2015	Rincon de Guanabo	E5	8	16
2015	Rincon de Guanabo	E5	9	27
2015	Rincon de Guanabo	E5	10	12
2015	Rincon de Guanabo	E6	1	21
2015	Rincon de Guanabo	E6	2	22
2015	Rincon de Guanabo	E6	3	20
2015	Rincon de Guanabo	E6	4	20
2015	Rincon de Guanabo	E6	5	20
2015	Rincon de Guanabo	E6	6	17
2015	Rincon de Guanabo	E6	7	23
2015	Rincon de Guanabo	E6	8	15
2015	Rincon de Guanabo	E6	9	18
2015	Rincon de Guanabo	E6	10	10
2017	Rincon de Guanabo	E1	1	33
2017	Rincon de Guanabo	E1	2	18
2017	Rincon de Guanabo	E1	3	57
2017	Rincon de Guanabo	E1	4	17
2017	Rincon de Guanabo	E1	5	41
2017	Rincon de Guanabo	E1	6	14
2017	Rincon de Guanabo	E1	7	9
2017	Rincon de Guanabo	E1	8	9
2017	Rincon de Guanabo	E1	9	0
2017	Rincon de Guanabo	E1	10	4
2017	Rincon de Guanabo	E2	1	24
2017	Rincon de Guanabo	E2	2	23
2017	Rincon de Guanabo	E2	3	28
2017	Rincon de Guanabo	E2	4	24
2017	Rincon de Guanabo	E2	5	28
2017	Rincon de Guanabo	E2	6	16
2017	Rincon de Guanabo	E2	7	45
2017	Rincon de Guanabo	E2	8	17
2017	Rincon de Guanabo	E2	9	39
2017	Rincon de Guanabo	E2	10	34
2017	Rincon de Guanabo	E3	1	10
2017	Rincon de Guanabo	E3	2	23
2017	Rincon de Guanabo	E3	3	19
2017	Rincon de Guanabo	E3	4	29
2017	Rincon de Guanabo	E3	5	35
2017	Rincon de Guanabo	E3	6	19
2017	Rincon de Guanabo	E3	7	24
2017	Rincon de Guanabo	E3	8	17
2017	Rincon de Guanabo	E3	9	11
2017	Rincon de Guanabo	E3	10	8
2017	Rincon de Guanabo	E4	1	12
2017	Rincon de Guanabo	E4	2	23
2017	Rincon de Guanabo	E4	3	14
2017	Rincon de Guanabo	E4	4	24
2017	Rincon de Guanabo	E4	5	30
2017	Rincon de Guanabo	E4	6	16
2017	Rincon de Guanabo	E4	7	52
2017	Rincon de Guanabo	E4	8	20
2017	Rincon de Guanabo	E4	9	29
2017	Rincon de Guanabo	E4	10	14
2017	Rincon de Guanabo	E5	1	29
2017	Rincon de Guanabo	E5	2	16
2017	Rincon de Guanabo	E5	3	7
2017	Rincon de Guanabo	E5	4	70
2017	Rincon de Guanabo	E5	5	21
2017	Rincon de Guanabo	E5	6	23
2017	Rincon de Guanabo	E5	7	39
2017	Rincon de Guanabo	E5	8	54
2017	Rincon de Guanabo	E5	9	23
2017	Rincon de Guanabo	E5	10	15
2017	Rincon de Guanabo	E6	1	6
2017	Rincon de Guanabo	E6	2	29
2017	Rincon de Guanabo	E6	3	24
2017	Rincon de Guanabo	E6	4	46
2017	Rincon de Guanabo	E6	5	37
2017	Rincon de Guanabo	E6	6	15
2017	Rincon de Guanabo	E6	7	21
2017	Rincon de Guanabo	E6	8	28
2017	Rincon de Guanabo	E6	9	17
2017	Rincon de Guanabo	E6	10	13
2021	Rincon de Guanabo	E1	1	6
2021	Rincon de Guanabo	E1	2	18
2021	Rincon de Guanabo	E1	3	1
2021	Rincon de Guanabo	E1	4	7
2021	Rincon de Guanabo	E1	5	2
2021	Rincon de Guanabo	E1	6	0
2021	Rincon de Guanabo	E1	7	0
2021	Rincon de Guanabo	E1	8	0
2021	Rincon de Guanabo	E1	9	0
2021	Rincon de Guanabo	E1	10	0
2021	Rincon de Guanabo	E2	1	22
2021	Rincon de Guanabo	E2	2	0
2021	Rincon de Guanabo	E2	3	0
2021	Rincon de Guanabo	E2	4	0
2021	Rincon de Guanabo	E2	5	0
2021	Rincon de Guanabo	E2	6	11
2021	Rincon de Guanabo	E2	7	0
2021	Rincon de Guanabo	E2	8	11
2021	Rincon de Guanabo	E2	9	12
2021	Rincon de Guanabo	E2	10	5
2021	Rincon de Guanabo	E3	1	27
2021	Rincon de Guanabo	E3	2	40
2021	Rincon de Guanabo	E3	3	53
2021	Rincon de Guanabo	E3	4	33
2021	Rincon de Guanabo	E3	5	40
2021	Rincon de Guanabo	E3	6	1
2021	Rincon de Guanabo	E3	7	1
2021	Rincon de Guanabo	E3	8	1
2021	Rincon de Guanabo	E3	9	1
2021	Rincon de Guanabo	E3	10	27
2021	Rincon de Guanabo	E4	1	11
2021	Rincon de Guanabo	E4	2	1
2021	Rincon de Guanabo	E4	3	3
2021	Rincon de Guanabo	E4	4	52
2021	Rincon de Guanabo	E4	5	16
2021	Rincon de Guanabo	E4	6	9
2021	Rincon de Guanabo	E4	7	4
2021	Rincon de Guanabo	E4	8	7
2021	Rincon de Guanabo	E4	9	8
2021	Rincon de Guanabo	E4	10	12
2021	Rincon de Guanabo	E5	1	8
2021	Rincon de Guanabo	E5	2	0
2021	Rincon de Guanabo	E5	3	1
2021	Rincon de Guanabo	E5	4	12
2021	Rincon de Guanabo	E5	5	8
2021	Rincon de Guanabo	E5	6	0
2021	Rincon de Guanabo	E5	7	10
2021	Rincon de Guanabo	E5	8	0
2021	Rincon de Guanabo	E5	9	12
2021	Rincon de Guanabo	E5	10	12
2021	Rincon de Guanabo	E6	1	28
2021	Rincon de Guanabo	E6	2	8
2021	Rincon de Guanabo	E6	3	7
2021	Rincon de Guanabo	E6	4	41
2021	Rincon de Guanabo	E6	5	27
2021	Rincon de Guanabo	E6	6	0
2021	Rincon de Guanabo	E6	7	0
2021	Rincon de Guanabo	E6	8	0
2021	Rincon de Guanabo	E6	9	0
2021	Rincon de Guanabo	E6	10	0

## Sheet: Re sheeting of A.palmata
Year	Reef	Station	Transect	Density
2012	Playa Baracoa	E1	1	0
2012	Playa Baracoa	E1	2	0
2012	Playa Baracoa	E1	3	0
2012	Playa Baracoa	E1	4	0
2012	Playa Baracoa	E1	5	0
2012	Playa Baracoa	E1	6	0
2012	Playa Baracoa	E1	7	0
2012	Playa Baracoa	E1	8	0
2012	Playa Baracoa	E1	9	0
2012	Playa Baracoa	E1	10	0
2012	Playa Baracoa	E2	1	0
2012	Playa Baracoa	E2	2	0
2012	Playa Baracoa	E2	3	0
2012	Playa Baracoa	E2	4	0
2012	Playa Baracoa	E2	5	0
2012	Playa Baracoa	E2	6	0
2012	Playa Baracoa	E2	7	0
2012	Playa Baracoa	E2	8	0
2012	Playa Baracoa	E2	9	0
2012	Playa Baracoa	E2	10	0
2012	Playa Baracoa	E3	1	0
2012	Playa Baracoa	E3	2	0
2012	Playa Baracoa	E3	3	0
2012	Playa Baracoa	E3	4	0
2012	Playa Baracoa	E3	5	0
2012	Playa Baracoa	E3	6	0
2012	Playa Baracoa	E3	7	0
2012	Playa Baracoa	E3	8	0
2012	Playa Baracoa	E3	9	0
2012	Playa Baracoa	E3	10	0
2012	Playa Baracoa	E4	1	0
2012	Playa Baracoa	E4	2	0
2012	Playa Baracoa	E4	3	0
2012	Playa Baracoa	E4	4	0
2012	Playa Baracoa	E4	5	0
2012	Playa Baracoa	E4	6	0
2012	Playa Baracoa	E4	7	6
2012	Playa Baracoa	E4	8	5
2012	Playa Baracoa	E4	9	2
2012	Playa Baracoa	E4	10	1
2012	Playa Baracoa	E5	1	2
2012	Playa Baracoa	E5	2	11
2012	Playa Baracoa	E5	3	1
2012	Playa Baracoa	E5	4	4
2012	Playa Baracoa	E5	5	10
2012	Playa Baracoa	E5	6	0
2012	Playa Baracoa	E5	7	0
2012	Playa Baracoa	E5	8	0
2012	Playa Baracoa	E5	9	7
2012	Playa Baracoa	E5	10	0
2013	Playa Baracoa	E1	1	0
2013	Playa Baracoa	E1	2	1
2013	Playa Baracoa	E1	3	0
2013	Playa Baracoa	E1	4	2
2013	Playa Baracoa	E1	5	1
2013	Playa Baracoa	E1	6	0
2013	Playa Baracoa	E1	7	10
2013	Playa Baracoa	E1	8	1
2013	Playa Baracoa	E1	9	3
2013	Playa Baracoa	E1	10	0
2013	Playa Baracoa	E2	1	12
2013	Playa Baracoa	E2	2	2
2013	Playa Baracoa	E2	3	3
2013	Playa Baracoa	E2	4	0
2013	Playa Baracoa	E2	5	1
2013	Playa Baracoa	E2	6	3
2013	Playa Baracoa	E2	7	2
2013	Playa Baracoa	E2	8	0
2013	Playa Baracoa	E2	9	0
2013	Playa Baracoa	E2	10	1
2013	Playa Baracoa	E3	1	4
2013	Playa Baracoa	E3	2	0
2013	Playa Baracoa	E3	3	0
2013	Playa Baracoa	E3	4	3
2013	Playa Baracoa	E3	5	1
2013	Playa Baracoa	E3	6	1
2013	Playa Baracoa	E3	7	7
2013	Playa Baracoa	E3	8	2
2013	Playa Baracoa	E3	9	0
2013	Playa Baracoa	E3	10	0
2013	Playa Baracoa	E4	1	2
2013	Playa Baracoa	E4	2	4
2013	Playa Baracoa	E4	3	1
2013	Playa Baracoa	E4	4	12
2013	Playa Baracoa	E4	5	1
2013	Playa Baracoa	E4	6	8
2013	Playa Baracoa	E4	7	7
2013	Playa Baracoa	E4	8	0
2013	Playa Baracoa	E4	9	9
2013	Playa Baracoa	E4	10	0
2013	Playa Baracoa	E5	1	0
2013	Playa Baracoa	E5	2	0
2013	Playa Baracoa	E5	3	1
2013	Playa Baracoa	E5	4	0
2013	Playa Baracoa	E5	5	1
2013	Playa Baracoa	E5	6	0
2013	Playa Baracoa	E5	7	0
2013	Playa Baracoa	E5	8	0
2013	Playa Baracoa	E5	9	14
2013	Playa Baracoa	E5	10	3
2015	Playa Baracoa	E1	1	5
2015	Playa Baracoa	E1	2	0
2015	Playa Baracoa	E1	3	1
2015	Playa Baracoa	E1	4	1
2015	Playa Baracoa	E1	5	0
2015	Playa Baracoa	E1	6	1
2015	Playa Baracoa	E1	7	4
2015	Playa Baracoa	E1	8	0
2015	Playa Baracoa	E1	9	1
2015	Playa Baracoa	E1	10	0
2015	Playa Baracoa	E2	1	13
2015	Playa Baracoa	E2	2	9
2015	Playa Baracoa	E2	3	2
2015	Playa Baracoa	E2	4	1
2015	Playa Baracoa	E2	5	0
2015	Playa Baracoa	E2	6	8
2015	Playa Baracoa	E2	7	11
2015	Playa Baracoa	E2	8	0
2015	Playa Baracoa	E2	9	5
2015	Playa Baracoa	E2	10	0
2015	Playa Baracoa	E3	1	3
2015	Playa Baracoa	E3	2	6
2015	Playa Baracoa	E3	3	4
2015	Playa Baracoa	E3	4	5
2015	Playa Baracoa	E3	5	7
2015	Playa Baracoa	E3	6	3
2015	Playa Baracoa	E3	7	3
2015	Playa Baracoa	E3	8	4
2015	Playa Baracoa	E3	9	5
2015	Playa Baracoa	E3	10	3
2015	Playa Baracoa	E4	1	6
2015	Playa Baracoa	E4	2	2
2015	Playa Baracoa	E4	3	3
2015	Playa Baracoa	E4	4	0
2015	Playa Baracoa	E4	5	0
2015	Playa Baracoa	E4	6	1
2015	Playa Baracoa	E4	7	0
2015	Playa Baracoa	E4	8	0
2015	Playa Baracoa	E4	9	0
2015	Playa Baracoa	E4	10	15
2015	Playa Baracoa	E5	1	12
2015	Playa Baracoa	E5	2	7
2015	Playa Baracoa	E5	3	0
2015	Playa Baracoa	E5	4	0
2015	Playa Baracoa	E5	5	0
2015	Playa Baracoa	E5	6	1
2015	Playa Baracoa	E5	7	8
2015	Playa Baracoa	E5	8	7
2015	Playa Baracoa	E5	9	0
2015	Playa Baracoa	E5	10	0
2015	Playa Baracoa	E6	1	0
2015	Playa Baracoa	E6	2	3
2015	Playa Baracoa	E6	3	7
2015	Playa Baracoa	E6	4	0
2015	Playa Baracoa	E6	5	0
2015	Playa Baracoa	E6	6	0
2015	Playa Baracoa	E6	7	0
2015	Playa Baracoa	E6	8	0
2015	Playa Baracoa	E6	9	0
2015	Playa Baracoa	E6	10	0
2017	Playa Baracoa	E1	1	20
2017	Playa Baracoa	E1	2	0
2017	Playa Baracoa	E1	3	0
2017	Playa Baracoa	E1	4	0
2017	Playa Baracoa	E1	5	0
2017	Playa Baracoa	E1	6	0
2017	Playa Baracoa	E1	7	0
2017	Playa Baracoa	E1	8	0
2017	Playa Baracoa	E1	9	5
2017	Playa Baracoa	E1	10	0
2017	Playa Baracoa	E2	1	0
2017	Playa Baracoa	E2	2	12
2017	Playa Baracoa	E2	3	3
2017	Playa Baracoa	E2	4	0
2017	Playa Baracoa	E2	5	1
2017	Playa Baracoa	E2	6	0
2017	Playa Baracoa	E2	7	0
2017	Playa Baracoa	E2	8	0
2017	Playa Baracoa	E2	9	0
2017	Playa Baracoa	E2	10	14
2017	Playa Baracoa	E3	1	1
2017	Playa Baracoa	E3	2	0
2017	Playa Baracoa	E3	3	0
2017	Playa Baracoa	E3	4	0
2017	Playa Baracoa	E3	5	0
2017	Playa Baracoa	E3	6	0
2017	Playa Baracoa	E3	7	12
2017	Playa Baracoa	E3	8	1
2017	Playa Baracoa	E3	9	0
2017	Playa Baracoa	E3	10	2
2017	Playa Baracoa	E4	1	0
2017	Playa Baracoa	E4	2	0
2017	Playa Baracoa	E4	3	0
2017	Playa Baracoa	E4	4	2
2017	Playa Baracoa	E4	5	7
2017	Playa Baracoa	E4	6	0
2017	Playa Baracoa	E4	7	0
2017	Playa Baracoa	E4	8	0
2017	Playa Baracoa	E4	9	8
2017	Playa Baracoa	E4	10	3
2017	Playa Baracoa	E5	1	0
2017	Playa Baracoa	E5	2	0
2017	Playa Baracoa	E5	3	0
2017	Playa Baracoa	E5	4	0
2017	Playa Baracoa	E5	5	0
2017	Playa Baracoa	E5	6	0
2017	Playa Baracoa	E5	7	0
2017	Playa Baracoa	E5	8	4
2017	Playa Baracoa	E5	9	3
2017	Playa Baracoa	E5	10	0
2017	Playa Baracoa	E6	1	0
2017	Playa Baracoa	E6	2	0
2017	Playa Baracoa	E6	3	0
2017	Playa Baracoa	E6	4	0
2017	Playa Baracoa	E6	5	0
2017	Playa Baracoa	E6	6	3
2017	Playa Baracoa	E6	7	1
2017	Playa Baracoa	E6	8	4
2017	Playa Baracoa	E6	9	5
2017	Playa Baracoa	E6	10	1
2021	Playa Baracoa	E1	1	0
2021	Playa Baracoa	E1	2	0
2021	Playa Baracoa	E1	3	0
2021	Playa Baracoa	E1	4	0
2021	Playa Baracoa	E1	5	0
2021	Playa Baracoa	E1	6	2
2021	Playa Baracoa	E1	7	0
2021	Playa Baracoa	E1	8	0
2021	Playa Baracoa	E1	9	0
2021	Playa Baracoa	E1	10	0
2021	Playa Baracoa	E2	1	0
2021	Playa Baracoa	E2	2	0
2021	Playa Baracoa	E2	3	0
2021	Playa Baracoa	E2	4	4
2021	Playa Baracoa	E2	5	1
2021	Playa Baracoa	E2	6	0
2021	Playa Baracoa	E2	7	0
2021	Playa Baracoa	E2	8	2
2021	Playa Baracoa	E2	9	0
2021	Playa Baracoa	E2	10	0
2021	Playa Baracoa	E3	1	1
2021	Playa Baracoa	E3	2	8
2021	Playa Baracoa	E3	3	0
2021	Playa Baracoa	E3	4	8
2021	Playa Baracoa	E3	5	1
2021	Playa Baracoa	E3	6	0
2021	Playa Baracoa	E3	7	0
2021	Playa Baracoa	E3	8	15
2021	Playa Baracoa	E3	9	5
2021	Playa Baracoa	E3	10	0
2021	Playa Baracoa	E4	1	1
2021	Playa Baracoa	E4	2	0
2021	Playa Baracoa	E4	3	0
2021	Playa Baracoa	E4	4	0
2021	Playa Baracoa	E4	5	0
2021	Playa Baracoa	E4	6	0
2021	Playa Baracoa	E4	7	0
2021	Playa Baracoa	E4	8	1
2021	Playa Baracoa	E4	9	0
2021	Playa Baracoa	E4	10	0
2021	Playa Baracoa	E5	1	4
2021	Playa Baracoa	E5	2	0
2021	Playa Baracoa	E5	3	0
2021	Playa Baracoa	E5	4	0
2021	Playa Baracoa	E5	5	1
2021	Playa Baracoa	E5	6	2
2021	Playa Baracoa	E5	7	0
2021	Playa Baracoa	E5	8	0
2021	Playa Baracoa	E5	9	0
2021	Playa Baracoa	E5	10	0
2021	Playa Baracoa	E6	1	0
2021	Playa Baracoa	E6	2	0
2021	Playa Baracoa	E6	3	2
2021	Playa Baracoa	E6	4	0
2021	Playa Baracoa	E6	5	0
2021	Playa Baracoa	E6	6	0
2021	Playa Baracoa	E6	7	0
2021	Playa Baracoa	E6	8	0
2021	Playa Baracoa	E6	9	0
2021	Playa Baracoa	E6	10	0
2015	Rincón de Guanabo	E1	1	4
2015	Rincón de Guanabo	E1	2	0
2015	Rincón de Guanabo	E1	3	0
2015	Rincón de Guanabo	E1	4	0
2015	Rincón de Guanabo	E1	5	0
2015	Rincón de Guanabo	E1	6	0
2015	Rincón de Guanabo	E1	7	0
2015	Rincón de Guanabo	E1	8	0
2015	Rincón de Guanabo	E1	9	0
2015	Rincón de Guanabo	E1	10	0
2015	Rincón de Guanabo	E2	1	0
2015	Rincón de Guanabo	E2	2	0
2015	Rincón de Guanabo	E2	3	0
2015	Rincón de Guanabo	E2	4	0
2015	Rincón de Guanabo	E2	5	0
2015	Rincón de Guanabo	E2	6	0
2015	Rincón de Guanabo	E2	7	0
2015	Rincón de Guanabo	E2	8	0
2015	Rincón de Guanabo	E2	9	0
2015	Rincón de Guanabo	E2	10	0
2015	Rincón de Guanabo	E3	1	0
2015	Rincón de Guanabo	E3	2	1
2015	Rincón de Guanabo	E3	3	2
2015	Rincón de Guanabo	E3	4	0
2015	Rincón de Guanabo	E3	5	1
2015	Rincón de Guanabo	E3	6	3
2015	Rincón de Guanabo	E3	7	1
2015	Rincón de Guanabo	E3	8	2
2015	Rincón de Guanabo	E3	9	3
2015	Rincón de Guanabo	E3	10	2
2015	Rincón de Guanabo	E4	1	0
2015	Rincón de Guanabo	E4	2	0
2015	Rincón de Guanabo	E4	3	0
2015	Rincón de Guanabo	E4	4	0
2015	Rincón de Guanabo	E4	5	0
2015	Rincón de Guanabo	E4	6	0
2015	Rincón de Guanabo	E4	7	0
2015	Rincón de Guanabo	E4	8	0
2015	Rincón de Guanabo	E4	9	0
2015	Rincón de Guanabo	E4	10	0
2015	Rincón de Guanabo	E5	1	5
2015	Rincón de Guanabo	E5	2	9
2015	Rincón de Guanabo	E5	3	5
2015	Rincón de Guanabo	E5	4	9
2015	Rincón de Guanabo	E5	5	3
2015	Rincón de Guanabo	E5	6	0
2015	Rincón de Guanabo	E5	7	0
2015	Rincón de Guanabo	E5	8	1
2015	Rincón de Guanabo	E5	9	11
2015	Rincón de Guanabo	E5	10	5
2015	Rincón de Guanabo	E6	1	7
2015	Rincón de Guanabo	E6	2	6
2015	Rincón de Guanabo	E6	3	7
2015	Rincón de Guanabo	E6	4	7
2015	Rincón de Guanabo	E6	5	3
2015	Rincón de Guanabo	E6	6	7
2015	Rincón de Guanabo	E6	7	0
2015	Rincón de Guanabo	E6	8	1
2015	Rincón de Guanabo	E6	9	0
2015	Rincón de Guanabo	E6	10	2
2017	Rincón de Guanabo	E1	1	0
2017	Rincón de Guanabo	E1	2	5
2017	Rincón de Guanabo	E1	3	18
2017	Rincón de Guanabo	E1	4	6
2017	Rincón de Guanabo	E1	5	4
2017	Rincón de Guanabo	E1	6	0
2017	Rincón de Guanabo	E1	7	1
2017	Rincón de Guanabo	E1	8	0
2017	Rincón de Guanabo	E1	9	0
2017	Rincón de Guanabo	E1	10	0
2017	Rincón de Guanabo	E2	1	0
2017	Rincón de Guanabo	E2	2	0
2017	Rincón de Guanabo	E2	3	9
2017	Rincón de Guanabo	E2	4	12
2017	Rincón de Guanabo	E2	5	1
2017	Rincón de Guanabo	E2	6	10
2017	Rincón de Guanabo	E2	7	0
2017	Rincón de Guanabo	E2	8	0
2017	Rincón de Guanabo	E2	9	0
2017	Rincón de Guanabo	E2	10	0
2017	Rincón de Guanabo	E3	1	0
2017	Rincón de Guanabo	E3	2	0
2017	Rincón de Guanabo	E3	3	6
2017	Rincón de Guanabo	E3	4	10
2017	Rincón de Guanabo	E3	5	20
2017	Rincón de Guanabo	E3	6	5
2017	Rincón de Guanabo	E3	7	5
2017	Rincón de Guanabo	E3	8	0
2017	Rincón de Guanabo	E3	9	0
2017	Rincón de Guanabo	E3	10	0
2017	Rincón de Guanabo	E4	1	1
2017	Rincón de Guanabo	E4	2	0
2017	Rincón de Guanabo	E4	3	0
2017	Rincón de Guanabo	E4	4	0
2017	Rincón de Guanabo	E4	5	8
2017	Rincón de Guanabo	E4	6	6
2017	Rincón de Guanabo	E4	7	4
2017	Rincón de Guanabo	E4	8	5
2017	Rincón de Guanabo	E4	9	0
2017	Rincón de Guanabo	E4	10	0
2017	Rincón de Guanabo	E5	1	0
2017	Rincón de Guanabo	E5	2	0
2017	Rincón de Guanabo	E5	3	0
2017	Rincón de Guanabo	E5	4	11
2017	Rincón de Guanabo	E5	5	14
2017	Rincón de Guanabo	E5	6	7
2017	Rincón de Guanabo	E5	7	0
2017	Rincón de Guanabo	E5	8	0
2017	Rincón de Guanabo	E5	9	0
2017	Rincón de Guanabo	E5	10	0
2017	Rincón de Guanabo	E6	1	0
2017	Rincón de Guanabo	E6	2	0
2017	Rincón de Guanabo	E6	3	0
2017	Rincón de Guanabo	E6	4	0
2017	Rincón de Guanabo	E6	5	6
2017	Rincón de Guanabo	E6	6	3
2017	Rincón de Guanabo	E6	7	3
2017	Rincón de Guanabo	E6	8	10
2017	Rincón de Guanabo	E6	9	0
2017	Rincón de Guanabo	E6	10	0
2021	Rincón de Guanabo	E1	1	4
2021	Rincón de Guanabo	E1	2	15
2021	Rincón de Guanabo	E1	3	0
2021	Rincón de Guanabo	E1	4	4
2021	Rincón de Guanabo	E1	5	2
2021	Rincón de Guanabo	E1	6	0
2021	Rincón de Guanabo	E1	7	0
2021	Rincón de Guanabo	E1	8	0
2021	Rincón de Guanabo	E1	9	0
2021	Rincón de Guanabo	E1	10	0
2021	Rincón de Guanabo	E2	1	1
2021	Rincón de Guanabo	E2	2	0
2021	Rincón de Guanabo	E2	3	0
2021	Rincón de Guanabo	E2	4	0
2021	Rincón de Guanabo	E2	5	0
2021	Rincón de Guanabo	E2	6	8
2021	Rincón de Guanabo	E2	7	0
2021	Rincón de Guanabo	E2	8	5
2021	Rincón de Guanabo	E2	9	9
2021	Rincón de Guanabo	E2	10	3
2021	Rincón de Guanabo	E3	1	16
2021	Rincón de Guanabo	E3	2	28
2021	Rincón de Guanabo	E3	3	36
2021	Rincón de Guanabo	E3	4	25
2021	Rincón de Guanabo	E3	5	30
2021	Rincón de Guanabo	E3	6	1
2021	Rincón de Guanabo	E3	7	0
2021	Rincón de Guanabo	E3	8	1
2021	Rincón de Guanabo	E3	9	1
2021	Rincón de Guanabo	E3	10	21
2021	Rincón de Guanabo	E4	1	4
2021	Rincón de Guanabo	E4	2	1
2021	Rincón de Guanabo	E4	3	2
2021	Rincón de Guanabo	E4	4	23
2021	Rincón de Guanabo	E4	5	10
2021	Rincón de Guanabo	E4	6	0
2021	Rincón de Guanabo	E4	7	0
2021	Rincón de Guanabo	E4	8	0
2021	Rincón de Guanabo	E4	9	2
2021	Rincón de Guanabo	E4	10	4
2021	Rincón de Guanabo	E5	1	8
2021	Rincón de Guanabo	E5	2	0
2021	Rincón de Guanabo	E5	3	0
2021	Rincón de Guanabo	E5	4	3
2021	Rincón de Guanabo	E5	5	4
2021	Rincón de Guanabo	E5	6	0
2021	Rincón de Guanabo	E5	7	2
2021	Rincón de Guanabo	E5	8	0
2021	Rincón de Guanabo	E5	9	2
2021	Rincón de Guanabo	E5	10	6
2021	Rincón de Guanabo	E6	1	13
2021	Rincón de Guanabo	E6	2	4
2021	Rincón de Guanabo	E6	3	4
2021	Rincón de Guanabo	E6	4	30
2021	Rincón de Guanabo	E6	5	12
2021	Rincón de Guanabo	E6	6	0
2021	Rincón de Guanabo	E6	7	0
2021	Rincón de Guanabo	E6	8	0
2021	Rincón de Guanabo	E6	9	0
2021	Rincón de Guanabo	E6	10	0

## Sheet: Size of A. palmata
Year	Reef	Nunmber of colony	Diameter (cm)	Height (cm)
2005	Playa Baracoa	1	71	33
2005	Playa Baracoa	2	37	19
2005	Playa Baracoa	3	4	1
2005	Playa Baracoa	4	8	5
2005	Playa Baracoa	5	7	5
2005	Playa Baracoa	6	25	6
2005	Playa Baracoa	7	8	1
2005	Playa Baracoa	8	10	1
2005	Playa Baracoa	9	21	2
2005	Playa Baracoa	10	138	66
2005	Playa Baracoa	11	45	7
2005	Playa Baracoa	12	109	52
2005	Playa Baracoa	13	86	41
2005	Playa Baracoa	14	126	44
2005	Playa Baracoa	15	71	39
2005	Playa Baracoa	16	22	6
2005	Playa Baracoa	17	6	1
2005	Playa Baracoa	18	13	1
2005	Playa Baracoa	19	243	48
2005	Playa Baracoa	20	16	3
2005	Playa Baracoa	21	64	16
2005	Playa Baracoa	22	37	10
2005	Playa Baracoa	23	209	56
2005	Playa Baracoa	24	172	67
2005	Playa Baracoa	25	11	2
2005	Playa Baracoa	26	74	69
2005	Playa Baracoa	27	43	9
2005	Playa Baracoa	28	121	69
2005	Playa Baracoa	29	67	7
2005	Playa Baracoa	30	57	4
2005	Playa Baracoa	31	88	37
2005	Playa Baracoa	32	69	67
2005	Playa Baracoa	33	167	67
2005	Playa Baracoa	34	173	74
2005	Playa Baracoa	35	254	71
2005	Playa Baracoa	36	104	56
2005	Playa Baracoa	37	181	72
2005	Playa Baracoa	38	284	91
2005	Playa Baracoa	39	119	67
2005	Playa Baracoa	40	100	48
2005	Playa Baracoa	41	69	43
2005	Playa Baracoa	42	49	25
2005	Playa Baracoa	43	150	100
2005	Playa Baracoa	44	209	75
2005	Playa Baracoa	45	170	120
2005	Playa Baracoa	46	26	5
2005	Playa Baracoa	47	176	110
2005	Playa Baracoa	48	29	22
2005	Playa Baracoa	49	5	2
2005	Playa Baracoa	50	7	4
2005	Playa Baracoa	51	22	7
2005	Playa Baracoa	52	32	8
2005	Playa Baracoa	53	7	1
2005	Playa Baracoa	54	283	67
2005	Playa Baracoa	55	150	13
2005	Playa Baracoa	56	32	6
2005	Playa Baracoa	57	305	105
2005	Playa Baracoa	58	46	2
2005	Playa Baracoa	59	72	3
2005	Playa Baracoa	60	310	50
2005	Playa Baracoa	61	25	5
2005	Playa Baracoa	62	6	2
2005	Playa Baracoa	63	3	1
2005	Playa Baracoa	64	20	3
2005	Playa Baracoa	65	8	6
2005	Playa Baracoa	66	3	1
2005	Playa Baracoa	67	8	1
2005	Playa Baracoa	68	143	55
2005	Playa Baracoa	69	11	2
2005	Playa Baracoa	70	9	2
2005	Playa Baracoa	71	124	56
2005	Playa Baracoa	72	20	4
2005	Playa Baracoa	73	9	2
2005	Playa Baracoa	74	50	32
2005	Playa Baracoa	75	19	1
2005	Playa Baracoa	76	5	1
2005	Playa Baracoa	77	122	78
2005	Playa Baracoa	78	10	2
2005	Playa Baracoa	79	31	8
2005	Playa Baracoa	80	18	4
2005	Playa Baracoa	81	36	10
2005	Playa Baracoa	82	161	64
2005	Playa Baracoa	83	158	62
2005	Playa Baracoa	84	131	56
2005	Playa Baracoa	85	15	1
2005	Playa Baracoa	86	166	82
2005	Playa Baracoa	87	153	76
2005	Playa Baracoa	88	14	1
2005	Playa Baracoa	89	6	1
2005	Playa Baracoa	90	6	1
2005	Playa Baracoa	91	11	3
2005	Playa Baracoa	92	7	1
2005	Playa Baracoa	93	13	1
2005	Playa Baracoa	94	68	46
2005	Playa Baracoa	95	22	2
2005	Playa Baracoa	96	9	2
2005	Playa Baracoa	97	14	8
2005	Playa Baracoa	98	139	69
2005	Playa Baracoa	99	9	1
2005	Playa Baracoa	100	35	20
2005	Playa Baracoa	101	87	25
2005	Playa Baracoa	102	14	1
2005	Playa Baracoa	103	243	45
2005	Playa Baracoa	104	13	3
2005	Playa Baracoa	105	5	1
2005	Playa Baracoa	106	9	1
2005	Playa Baracoa	107	6	1
2005	Playa Baracoa	108	220	100
2005	Playa Baracoa	109	14	1
2005	Playa Baracoa	110	9	1
2005	Playa Baracoa	111	15	2
2005	Playa Baracoa	112	11	2
2005	Playa Baracoa	113	13	1
2005	Playa Baracoa	114	16	1
2005	Playa Baracoa	115	2	1
2005	Playa Baracoa	116	3	1
2005	Playa Baracoa	117	34	7
2005	Playa Baracoa	118	210	76
2005	Playa Baracoa	119	13	4
2005	Playa Baracoa	120	20	6
2005	Playa Baracoa	121	8	3
2005	Playa Baracoa	122	26	9
2005	Playa Baracoa	123	136	62
2005	Playa Baracoa	124	88	72
2005	Playa Baracoa	125	9	1
2005	Playa Baracoa	126	6	1
2005	Playa Baracoa	127	205	74
2005	Playa Baracoa	128	36	7
2005	Playa Baracoa	129	150	71
2005	Playa Baracoa	130	172	74
2005	Playa Baracoa	131	114	70
2005	Playa Baracoa	132	7	1
2005	Playa Baracoa	133	15	3
2005	Playa Baracoa	134	4	1
2005	Playa Baracoa	135	85	30
2005	Playa Baracoa	136	8	1
2005	Playa Baracoa	137	27	4
2005	Playa Baracoa	138	10	7
2005	Playa Baracoa	139	6	2
2005	Playa Baracoa	140	210	85
2005	Playa Baracoa	141	345	60
2005	Playa Baracoa	142	23	8
2005	Playa Baracoa	143	9	1
2005	Playa Baracoa	144	7	3
2005	Playa Baracoa	145	4	1
2005	Playa Baracoa	146	22	1
2005	Playa Baracoa	147	5	1
2005	Playa Baracoa	148	23	2
2005	Playa Baracoa	149	22	1
2005	Playa Baracoa	150	31	2
2005	Playa Baracoa	151	7	3
2005	Playa Baracoa	152	3	1
2005	Playa Baracoa	153	8	1
2005	Playa Baracoa	154	5	2
2005	Playa Baracoa	155	7	1
2005	Playa Baracoa	156	2	1
2005	Playa Baracoa	157	28	4
2005	Playa Baracoa	158	6	2
2005	Playa Baracoa	159	23	3
2005	Playa Baracoa	160	6	1
2005	Playa Baracoa	161	7	2
2005	Playa Baracoa	162	10	2
2005	Playa Baracoa	163	3	1
2005	Playa Baracoa	164	24	7
2005	Playa Baracoa	165	5	1
2005	Playa Baracoa	166	20	9
2005	Playa Baracoa	167	6	1
2005	Playa Baracoa	168	5	2
2005	Playa Baracoa	169	73	38
2005	Playa Baracoa	170	105	33
2005	Playa Baracoa	171	27	20
2005	Playa Baracoa	172	57	15
2005	Playa Baracoa	173	3	1
2005	Playa Baracoa	174	2	1
2005	Playa Baracoa	175	58	22
2005	Playa Baracoa	176	20	3
2005	Playa Baracoa	177	60	23
2005	Playa Baracoa	178	28	4
2005	Playa Baracoa	179	257	51
2005	Playa Baracoa	180	27	2
2005	Playa Baracoa	181	37	2
2005	Playa Baracoa	182	36	3
2005	Playa Baracoa	183	6	2
2005	Playa Baracoa	184	2	1
2005	Playa Baracoa	185	15	1
2005	Playa Baracoa	186	185	56
2005	Playa Baracoa	187	50	4
2005	Playa Baracoa	188	10	3
2005	Playa Baracoa	189	25	5
2005	Playa Baracoa	190	12	3
2005	Playa Baracoa	191	8	2
2005	Playa Baracoa	192	213	73
2005	Playa Baracoa	193	9	2
2005	Playa Baracoa	194	7	1
2005	Playa Baracoa	195	23	4
2005	Playa Baracoa	196	5	2
2005	Playa Baracoa	197	6	2
2005	Playa Baracoa	198	24	4
2005	Playa Baracoa	199	5	2
2005	Playa Baracoa	200	22	9
2005	Playa Baracoa	201	28	6
2005	Playa Baracoa	202	7	1
2005	Playa Baracoa	203	7	2
2005	Playa Baracoa	204	43	2
2005	Playa Baracoa	205	6	1
2005	Playa Baracoa	206	11	2
2005	Playa Baracoa	207	340	69
2005	Playa Baracoa	208	37	10
2005	Playa Baracoa	209	59	11
2005	Playa Baracoa	210	110	30
2005	Playa Baracoa	211	292	37
2005	Playa Baracoa	212	29	2
2005	Playa Baracoa	213	44	38
2005	Playa Baracoa	214	22	10
2005	Playa Baracoa	215	4	1
2005	Playa Baracoa	216	7	2
2005	Playa Baracoa	217	5	1
2005	Playa Baracoa	218	106	62
2005	Playa Baracoa	219	103	43
2005	Playa Baracoa	220	17	3
2005	Playa Baracoa	221	136	55
2005	Playa Baracoa	222	6	2
2005	Playa Baracoa	223	8	3
2005	Playa Baracoa	224	289	40
2005	Playa Baracoa	225	100	44
2005	Playa Baracoa	226	79	9
2005	Playa Baracoa	227	198	71
2005	Playa Baracoa	228	13	3
2005	Playa Baracoa	229	20	8
2005	Playa Baracoa	230	169	49
2005	Playa Baracoa	231	31	2
2005	Playa Baracoa	232	12	5
2005	Playa Baracoa	233	12	3
2005	Playa Baracoa	234	4	1
2005	Playa Baracoa	235	3	1
2005	Playa Baracoa	236	17	7
2005	Playa Baracoa	237	21	1
2005	Playa Baracoa	238	216	43
2005	Playa Baracoa	239	6	4
2005	Playa Baracoa	240	330	65
2005	Playa Baracoa	241	286	70
2005	Playa Baracoa	242	18	3
2005	Playa Baracoa	243	6	1
2005	Playa Baracoa	244	13	2
2005	Playa Baracoa	245	2	1
2005	Playa Baracoa	246	9	1
2005	Playa Baracoa	247	4	1
2005	Playa Baracoa	248	120	50
2005	Playa Baracoa	249	14	3
2005	Playa Baracoa	250	5	2
2005	Playa Baracoa	251	20	5
2005	Playa Baracoa	252	7	3
2005	Playa Baracoa	253	5	1
2005	Playa Baracoa	254	6	1
2005	Playa Baracoa	255	29	10
2005	Playa Baracoa	256	11	3
2005	Playa Baracoa	257	4	1
2005	Playa Baracoa	258	25	17
2005	Playa Baracoa	259	70	47
2005	Playa Baracoa	260	49	25
2005	Playa Baracoa	261	43	17
2005	Playa Baracoa	262	55	33
2005	Playa Baracoa	263	174	86
2005	Playa Baracoa	264	8	3
2005	Playa Baracoa	265	100	78
2005	Playa Baracoa	266	196	73
2005	Playa Baracoa	267	102	23
2005	Playa Baracoa	268	188	79
2005	Playa Baracoa	269	5	2
2005	Playa Baracoa	270	8	2
2005	Playa Baracoa	271	86	22
2005	Playa Baracoa	272	159	54
2005	Playa Baracoa	273	23	25
2005	Playa Baracoa	274	34	3
2005	Playa Baracoa	275	162	82
2005	Playa Baracoa	276	38	45
2005	Playa Baracoa	277	15	8
2005	Playa Baracoa	278	6	6
2005	Playa Baracoa	279	96	64
2005	Playa Baracoa	280	33	27
2006	Playa Baracoa	1	16	18
2006	Playa Baracoa	2	7	9
2006	Playa Baracoa	3	30	20
2006	Playa Baracoa	4	13	15
2006	Playa Baracoa	5	39	28
2006	Playa Baracoa	6	5	6
2006	Playa Baracoa	7	13	16
2006	Playa Baracoa	8	47	32
2006	Playa Baracoa	9	52	56
2006	Playa Baracoa	10	6	2
2006	Playa Baracoa	11	7	1
2006	Playa Baracoa	12	15	2
2006	Playa Baracoa	13	14	28
2006	Playa Baracoa	14	18	23
2006	Playa Baracoa	15	15	31
2006	Playa Baracoa	16	17	28
2006	Playa Baracoa	17	22	26
2006	Playa Baracoa	18	105	43
2006	Playa Baracoa	19	8	3
2006	Playa Baracoa	20	10	3
2006	Playa Baracoa	21	7	3
2006	Playa Baracoa	22	70	23
2006	Playa Baracoa	23	12	14
2006	Playa Baracoa	24	31	25
2006	Playa Baracoa	25	32	11
2006	Playa Baracoa	26	41	23
2006	Playa Baracoa	27	23	20
2006	Playa Baracoa	28	12	6
2006	Playa Baracoa	29	20	18
2006	Playa Baracoa	30	12	6
2006	Playa Baracoa	31	20	18
2006	Playa Baracoa	32	12	6
2006	Playa Baracoa	33	18	13
2006	Playa Baracoa	34	11	3
2006	Playa Baracoa	35	15	18
2006	Playa Baracoa	36	10	21
2006	Playa Baracoa	37	21	22
2006	Playa Baracoa	38	30	22
2006	Playa Baracoa	39	6	1
2006	Playa Baracoa	40	84	45
2006	Playa Baracoa	41	22	26
2006	Playa Baracoa	42	3	1
2006	Playa Baracoa	43	9	1
2006	Playa Baracoa	44	12	3
2006	Playa Baracoa	45	48	42
2006	Playa Baracoa	46	3	1
2006	Playa Baracoa	47	34	31
2006	Playa Baracoa	48	65	20
2006	Playa Baracoa	49	110	69
2006	Playa Baracoa	50	6	2
2006	Playa Baracoa	51	6	2
2006	Playa Baracoa	52	88	13
2006	Playa Baracoa	53	110	76
2006	Playa Baracoa	54	34	37
2006	Playa Baracoa	55	21	8
2006	Playa Baracoa	56	10	3
2006	Playa Baracoa	57	68	15
2006	Playa Baracoa	58	69	34
2006	Playa Baracoa	59	107	31
2006	Playa Baracoa	60	21	17
2006	Playa Baracoa	61	162	56
2006	Playa Baracoa	62	14	10
2006	Playa Baracoa	63	127	48
2006	Playa Baracoa	64	21	14
2006	Playa Baracoa	65	9	8
2006	Playa Baracoa	66	30	22
2006	Playa Baracoa	67	38	14
2006	Playa Baracoa	68	11	3
2006	Playa Baracoa	69	6	4
2006	Playa Baracoa	70	52	19
2006	Playa Baracoa	71	33	28
2006	Playa Baracoa	72	31	30
2006	Playa Baracoa	73	21	12
2006	Playa Baracoa	74	83	52
2006	Playa Baracoa	75	127	56
2006	Playa Baracoa	76	12	3
2006	Playa Baracoa	77	170	46
2006	Playa Baracoa	78	20	2
2006	Playa Baracoa	79	18	12
2006	Playa Baracoa	80	14	5
2006	Playa Baracoa	81	16	20
2006	Playa Baracoa	82	16	10
2006	Playa Baracoa	83	13	4
2006	Playa Baracoa	84	17	3
2006	Playa Baracoa	85	2	1
2006	Playa Baracoa	86	63	12
2006	Playa Baracoa	87	4	1
2006	Playa Baracoa	88	22	18
2006	Playa Baracoa	89	23	8
2006	Playa Baracoa	90	7	2
2006	Playa Baracoa	91	20	7
2006	Playa Baracoa	92	10	2
2006	Playa Baracoa	93	29	34
2006	Playa Baracoa	94	3	1
2006	Playa Baracoa	95	8	3
2006	Playa Baracoa	96	13	14
2006	Playa Baracoa	97	8	2
2006	Playa Baracoa	98	98	57
2006	Playa Baracoa	99	10	2
2006	Playa Baracoa	100	24	32
2006	Playa Baracoa	101	14	3
2006	Playa Baracoa	102	64	65
2006	Playa Baracoa	103	20	2
2006	Playa Baracoa	104	7	3
2006	Playa Baracoa	105	46	54
2006	Playa Baracoa	106	7	1
2006	Playa Baracoa	107	29	5
2006	Playa Baracoa	108	127	51
2006	Playa Baracoa	109	20	14
2006	Playa Baracoa	110	114	54
2006	Playa Baracoa	111	52	48
2006	Playa Baracoa	112	23	34
2006	Playa Baracoa	113	3	1
2006	Playa Baracoa	114	23	48
2006	Playa Baracoa	115	42	49
2006	Playa Baracoa	116	53	41
2006	Playa Baracoa	117	35	56
2006	Playa Baracoa	118	35	45
2006	Playa Baracoa	119	31	26
2006	Playa Baracoa	120	36	56
2006	Playa Baracoa	121	20	3
2006	Playa Baracoa	122	18	41
2006	Playa Baracoa	123	16	31
2006	Playa Baracoa	124	27	23
2006	Playa Baracoa	125	7	2
2006	Playa Baracoa	126	12	4
2006	Playa Baracoa	127	28	25
2006	Playa Baracoa	128	17	9
2006	Playa Baracoa	129	8	2
2006	Playa Baracoa	130	6	2
2006	Playa Baracoa	131	9	7
2006	Playa Baracoa	132	17	11
2006	Playa Baracoa	133	44	23
2006	Playa Baracoa	134	11	5
2006	Playa Baracoa	135	105	60
2006	Playa Baracoa	136	34	10
2006	Playa Baracoa	137	41	36
2006	Playa Baracoa	138	32	18
2006	Playa Baracoa	139	45	26
2006	Playa Baracoa	140	62	41
2006	Playa Baracoa	141	135	70
2006	Playa Baracoa	142	15	18
2006	Playa Baracoa	143	122	63
2006	Playa Baracoa	144	6	5
2006	Playa Baracoa	145	104	68
2006	Playa Baracoa	146	150	78
2006	Playa Baracoa	147	44	41
2006	Playa Baracoa	148	45	25
2006	Playa Baracoa	149	5	2
2006	Playa Baracoa	150	10	3
2006	Playa Baracoa	151	13	6
2006	Playa Baracoa	152	20	2
2006	Playa Baracoa	153	9	1
2006	Playa Baracoa	154	15	11
2006	Playa Baracoa	155	18	9
2006	Playa Baracoa	156	40	11
2006	Playa Baracoa	157	32	10
2006	Playa Baracoa	158	7	2
2006	Playa Baracoa	159	32	9
2006	Playa Baracoa	160	13	1
2006	Playa Baracoa	161	47	11
2006	Playa Baracoa	162	8	2
2006	Playa Baracoa	163	122	52
2006	Playa Baracoa	164	108	20
2006	Playa Baracoa	165	21	4
2006	Playa Baracoa	166	18	13
2006	Playa Baracoa	167	66	52
2006	Playa Baracoa	168	15	5
2006	Playa Baracoa	169	7	3
2006	Playa Baracoa	170	12	5
2006	Playa Baracoa	171	12	2
2006	Playa Baracoa	172	9	1
2006	Playa Baracoa	173	6	2
2006	Playa Baracoa	174	3	1
2006	Playa Baracoa	175	19	7
2006	Playa Baracoa	176	73	87
2006	Playa Baracoa	177	25	36
2006	Playa Baracoa	178	22	23
2006	Playa Baracoa	179	9	3
2006	Playa Baracoa	180	10	2
2006	Playa Baracoa	181	2	1
2006	Playa Baracoa	182	16	11
2006	Playa Baracoa	183	29	27
2006	Playa Baracoa	184	62	75
2006	Playa Baracoa	185	20	18
2006	Playa Baracoa	186	11	2
2006	Playa Baracoa	187	2	1
2006	Playa Baracoa	188	8	13
2006	Playa Baracoa	189	94	44
2006	Playa Baracoa	190	111	39
2006	Playa Baracoa	191	44	33
2006	Playa Baracoa	192	91	42
2006	Playa Baracoa	193	33	21
2006	Playa Baracoa	194	54	19
2006	Playa Baracoa	195	37	9
2006	Playa Baracoa	196	71	22
2006	Playa Baracoa	197	8	4
2006	Playa Baracoa	198	11	4
2006	Playa Baracoa	199	13	9
2006	Playa Baracoa	200	96	45
2006	Playa Baracoa	201	204	89
2006	Playa Baracoa	202	30	17
2006	Playa Baracoa	203	77	30
2006	Playa Baracoa	204	72	35
2006	Playa Baracoa	205	10	5
2006	Playa Baracoa	206	25	13
2006	Playa Baracoa	207	24	8
2006	Playa Baracoa	208	57	27
2006	Playa Baracoa	209	20	8
2006	Playa Baracoa	210	12	6
2006	Playa Baracoa	211	216	90
2006	Playa Baracoa	212	28	13
2006	Playa Baracoa	213	32	14
2006	Playa Baracoa	214	130	20
2006	Playa Baracoa	215	16	7
2006	Playa Baracoa	216	133	30
2006	Playa Baracoa	217	8	6
2006	Playa Baracoa	218	27	34
2006	Playa Baracoa	219	142	97
2006	Playa Baracoa	220	182	83
2006	Playa Baracoa	221	58	43
2006	Playa Baracoa	222	40	12
2006	Playa Baracoa	223	32	19
2006	Playa Baracoa	224	22	9
2006	Playa Baracoa	225	13	8
2006	Playa Baracoa	226	7	6
2006	Playa Baracoa	227	15	9
2006	Playa Baracoa	228	16	4
2006	Playa Baracoa	229	67	34
2006	Playa Baracoa	230	18	22
2006	Playa Baracoa	231	9	4
2006	Playa Baracoa	232	12	6
2006	Playa Baracoa	233	18	10
2006	Playa Baracoa	234	117	92
2006	Playa Baracoa	235	95	119
2006	Playa Baracoa	236	24	26
2006	Playa Baracoa	237	80	65
2006	Playa Baracoa	238	17	13
2006	Playa Baracoa	239	31	42
2006	Playa Baracoa	240	7	7
2006	Playa Baracoa	241	20	18
2006	Playa Baracoa	242	179	82
2006	Playa Baracoa	243	46	33
2006	Playa Baracoa	244	25	13
2006	Playa Baracoa	245	15	10
2006	Playa Baracoa	246	5	1
2006	Playa Baracoa	247	78	82
2006	Playa Baracoa	248	21	6
2006	Playa Baracoa	249	26	28
2006	Playa Baracoa	250	18	33
2006	Playa Baracoa	251	24	28
2006	Playa Baracoa	252	16	12
2006	Playa Baracoa	253	15	14
2006	Playa Baracoa	254	14	14
2006	Playa Baracoa	255	55	53
2006	Playa Baracoa	256	95	46
2006	Playa Baracoa	257	18	12
2006	Playa Baracoa	258	58	47
2006	Playa Baracoa	259	8	3
2006	Playa Baracoa	260	25	4
2006	Playa Baracoa	261	4	1
2006	Playa Baracoa	262	10	2
2006	Playa Baracoa	263	10	3
2006	Playa Baracoa	264	7	2
2006	Playa Baracoa	265	21	16
2006	Playa Baracoa	266	12	3
2006	Playa Baracoa	267	81	42
2006	Playa Baracoa	268	21	12
2006	Playa Baracoa	269	19	10
2006	Playa Baracoa	270	6	1
2006	Playa Baracoa	271	11	4
2006	Playa Baracoa	272	51	34
2006	Playa Baracoa	273	70	53
2006	Playa Baracoa	274	81	42
2006	Playa Baracoa	275	16	11
2006	Playa Baracoa	276	77	49
2006	Playa Baracoa	277	68	33
2006	Playa Baracoa	278	78	58
2006	Playa Baracoa	279	51	45
2006	Playa Baracoa	280	26	7
2006	Playa Baracoa	281	180	66
2006	Playa Baracoa	282	22	16
2006	Playa Baracoa	283	10	13
2006	Playa Baracoa	284	108	50
2006	Playa Baracoa	285	90	34
2006	Playa Baracoa	286	10	10
2006	Playa Baracoa	287	6	5
2006	Playa Baracoa	288	38	41
2006	Playa Baracoa	289	39	26
2006	Playa Baracoa	290	25	26
2006	Playa Baracoa	291	34	25
2006	Playa Baracoa	292	15	8
2006	Playa Baracoa	293	30	36
2006	Playa Baracoa	294	63	41
2006	Playa Baracoa	295	24	18
2006	Playa Baracoa	296	19	12
2006	Playa Baracoa	297	22	18
2006	Playa Baracoa	298	122	86
2006	Playa Baracoa	299	49	26
2006	Playa Baracoa	300	65	48
2006	Playa Baracoa	301	37	29
2006	Playa Baracoa	302	13	7
2006	Playa Baracoa	303	10	3
2006	Playa Baracoa	304	22	20
2006	Playa Baracoa	305	26	9
2006	Playa Baracoa	306	1	1
2006	Playa Baracoa	307	28	8
2006	Playa Baracoa	308	32	34
2006	Playa Baracoa	309	109	42
2006	Playa Baracoa	310	22	6
2006	Playa Baracoa	311	15	4
2006	Playa Baracoa	312	17	5
2006	Playa Baracoa	313	21	8
2006	Playa Baracoa	314	57	14
2006	Playa Baracoa	315	22	14
2006	Playa Baracoa	316	8	2
2006	Playa Baracoa	317	58	49
2006	Playa Baracoa	318	6	1
2006	Playa Baracoa	319	9	2
2006	Playa Baracoa	320	4	1
2006	Playa Baracoa	321	66	34
2006	Playa Baracoa	322	33	22
2006	Playa Baracoa	323	21	10
2006	Playa Baracoa	324	77	47
2006	Playa Baracoa	325	92	37
2006	Playa Baracoa	326	236	83
2006	Playa Baracoa	327	151	23
2006	Playa Baracoa	328	9	3
2006	Playa Baracoa	329	53	14
2006	Playa Baracoa	330	9	4
2006	Playa Baracoa	331	41	15
2006	Playa Baracoa	332	13	3
2006	Playa Baracoa	333	72	50
2006	Playa Baracoa	334	10	1
2006	Playa Baracoa	335	8	3
2006	Playa Baracoa	336	9	2
2006	Playa Baracoa	337	64	38
2006	Playa Baracoa	338	18	5
2006	Playa Baracoa	339	6	2
2006	Playa Baracoa	340	13	7
2006	Playa Baracoa	341	47	16
2006	Playa Baracoa	342	84	13
2006	Playa Baracoa	343	9	3
2006	Playa Baracoa	344	10	7
2006	Playa Baracoa	345	71	42
2006	Playa Baracoa	346	13	4
2006	Playa Baracoa	347	73	24
2006	Playa Baracoa	348	35	23
2006	Playa Baracoa	349	103	57
2006	Playa Baracoa	350	12	3
2006	Playa Baracoa	351	46	15
2006	Playa Baracoa	352	10	4
2006	Playa Baracoa	353	47	26
2006	Playa Baracoa	354	35	12
2006	Playa Baracoa	355	115	40
2006	Playa Baracoa	356	40	10
2006	Playa Baracoa	357	6	2
2006	Playa Baracoa	358	5	2
2006	Playa Baracoa	359	20	2
2006	Playa Baracoa	360	47	17
2006	Playa Baracoa	361	140	55
2006	Playa Baracoa	362	48	30
2006	Playa Baracoa	363	190	65
2006	Playa Baracoa	364	90	70
2006	Playa Baracoa	365	125	40
2006	Playa Baracoa	366	44	36
2006	Playa Baracoa	367	22	20
2006	Playa Baracoa	368	30	20
2006	Playa Baracoa	369	76	26
2006	Playa Baracoa	370	122	70
2006	Playa Baracoa	371	39	20
2006	Playa Baracoa	372	14	7
2006	Playa Baracoa	373	8	2
2006	Playa Baracoa	374	19	5
2006	Playa Baracoa	375	145	10
2006	Playa Baracoa	376	112	63
2006	Playa Baracoa	377	121	83
2006	Playa Baracoa	378	124	57
2006	Playa Baracoa	379	4	2
2006	Playa Baracoa	380	90	61
2006	Playa Baracoa	381	14	10
2006	Playa Baracoa	382	13	4
2006	Playa Baracoa	383	11	2
2006	Playa Baracoa	384	6	4
2006	Playa Baracoa	385	75	27
2006	Playa Baracoa	386	49	7
2006	Playa Baracoa	387	9	5
2006	Playa Baracoa	388	18	22
2006	Playa Baracoa	389	18	10
2006	Playa Baracoa	390	35	28
2006	Playa Baracoa	391	7	1
2006	Playa Baracoa	392	89	32
2006	Playa Baracoa	393	39	27
2006	Playa Baracoa	394	68	36
2006	Playa Baracoa	395	14	8
2006	Playa Baracoa	396	7	2
2006	Playa Baracoa	397	3	1
2006	Playa Baracoa	398	14	2
2006	Playa Baracoa	399	5	1
2006	Playa Baracoa	400	18	3
2006	Playa Baracoa	401	10	6
2006	Playa Baracoa	402	9	3
2006	Playa Baracoa	403	10	2
2006	Playa Baracoa	404	53	14
2006	Playa Baracoa	405	8	2
2006	Playa Baracoa	406	38	35
2006	Playa Baracoa	407	13	2
2006	Playa Baracoa	408	19	6
2006	Playa Baracoa	409	7	3
2006	Playa Baracoa	410	65	24
2006	Playa Baracoa	411	46	23
2006	Playa Baracoa	412	18	8
2006	Playa Baracoa	413	10	6
2006	Playa Baracoa	414	12	15
2006	Playa Baracoa	415	24	18
2006	Playa Baracoa	416	98	43
2006	Playa Baracoa	417	51	28
2006	Playa Baracoa	418	65	19
2006	Playa Baracoa	419	251	65
2006	Playa Baracoa	420	16	3
2006	Playa Baracoa	421	27	3
2006	Playa Baracoa	422	14	5
2006	Playa Baracoa	423	3	33
2006	Playa Baracoa	424	133	59
2006	Playa Baracoa	425	31	20
2006	Playa Baracoa	426	125	44
2006	Playa Baracoa	427	39	27
2006	Playa Baracoa	428	125	49
2006	Playa Baracoa	429	115	60
2006	Playa Baracoa	430	92	53
2006	Playa Baracoa	431	50	29
2006	Playa Baracoa	432	32	27
2006	Playa Baracoa	433	150	60
2006	Playa Baracoa	434	115	40
2006	Playa Baracoa	435	31	22
2006	Playa Baracoa	436	27	27
2006	Playa Baracoa	437	57	40
2006	Playa Baracoa	438	52	22
2006	Playa Baracoa	439	105	42
2006	Playa Baracoa	440	13	20
2006	Playa Baracoa	441	16	10
2006	Playa Baracoa	442	19	9
2006	Playa Baracoa	443	24	15
2006	Playa Baracoa	444	35	10
2006	Playa Baracoa	445	34	25
2006	Playa Baracoa	446	144	43
2006	Playa Baracoa	447	68	33
2006	Playa Baracoa	448	14	10
2006	Playa Baracoa	449	78	39
2006	Playa Baracoa	450	19	5
2006	Playa Baracoa	451	118	33
2006	Playa Baracoa	452	120	67
2006	Playa Baracoa	453	12	11
2006	Playa Baracoa	454	34	15
2006	Playa Baracoa	455	21	17
2006	Playa Baracoa	456	7	4
2012	Playa Baracoa	1	176	84
2012	Playa Baracoa	2	83	46
2012	Playa Baracoa	3	146	46
2012	Playa Baracoa	4	170	54
2012	Playa Baracoa	5	260	63
2012	Playa Baracoa	6	238	90
2012	Playa Baracoa	7	258	86
2012	Playa Baracoa	8	200	81
2012	Playa Baracoa	9	45	29
2012	Playa Baracoa	10	39	10
2012	Playa Baracoa	11	240	70
2012	Playa Baracoa	12	20	9
2012	Playa Baracoa	13	124	40
2012	Playa Baracoa	14	30	17
2012	Playa Baracoa	15	50	15
2012	Playa Baracoa	16	70	25
2012	Playa Baracoa	17	350	92
2012	Playa Baracoa	18	91	63
2012	Playa Baracoa	19	300	115
2012	Playa Baracoa	20	162	60
2012	Playa Baracoa	21	280	86
2012	Playa Baracoa	22	157	63
2012	Playa Baracoa	23	78	20
2012	Playa Baracoa	24	275	130
2012	Playa Baracoa	25	38	38
2012	Playa Baracoa	26	60	52
2012	Playa Baracoa	27	38	41
2012	Playa Baracoa	28	128	70
2012	Playa Baracoa	29	26	22
2012	Playa Baracoa	30	178	78
2012	Playa Baracoa	31	163	52
2012	Playa Baracoa	32	48	24
2012	Playa Baracoa	33	126	76
2012	Playa Baracoa	34	72	56
2012	Playa Baracoa	35	74	50
2012	Playa Baracoa	36	109	74
2012	Playa Baracoa	37	104	65
2012	Playa Baracoa	38	25	18
2012	Playa Baracoa	39	12	11
2012	Playa Baracoa	40	16	4
2012	Playa Baracoa	41	95	59
2012	Playa Baracoa	42	81	40
2012	Playa Baracoa	43	20	16
2012	Playa Baracoa	44	10	7
2012	Playa Baracoa	45	10	6
2012	Playa Baracoa	46	20	79
2012	Playa Baracoa	47	69	40
2012	Playa Baracoa	48	38	25
2012	Playa Baracoa	49	122	75
2012	Playa Baracoa	50	98	50
2012	Playa Baracoa	51	149	80
2012	Playa Baracoa	52	52	14
2012	Playa Baracoa	53	22	12
2012	Playa Baracoa	54	200	42
2012	Playa Baracoa	55	354	100
2012	Playa Baracoa	56	161	56
2012	Playa Baracoa	57	130	54
2012	Playa Baracoa	58	37	5
2012	Playa Baracoa	59	135	35
2012	Playa Baracoa	60	118	36
2012	Playa Baracoa	61	85	36
2012	Playa Baracoa	62	8	7
2012	Playa Baracoa	63	8	5
2012	Playa Baracoa	64	20	8
2012	Playa Baracoa	65	75	24
2012	Playa Baracoa	66	19	6
2012	Playa Baracoa	67	142	80
2012	Playa Baracoa	68	74	30
2012	Playa Baracoa	69	250	79
2012	Playa Baracoa	70	190	94
2012	Playa Baracoa	71	85	54
2012	Playa Baracoa	72	220	80
2012	Playa Baracoa	73	125	37
2012	Playa Baracoa	74	51	18
2012	Playa Baracoa	75	160	57
2012	Playa Baracoa	76	220	74
2012	Playa Baracoa	77	240	72
2012	Playa Baracoa	78	170	64
2012	Playa Baracoa	79	106	66
2012	Playa Baracoa	80	115	60
2012	Playa Baracoa	81	173	82
2012	Playa Baracoa	82	425	12
2012	Playa Baracoa	83	60	22
2012	Playa Baracoa	84	12	2
2012	Playa Baracoa	85	10	2
2012	Playa Baracoa	86	10	1
2012	Playa Baracoa	87	30	1
2012	Playa Baracoa	88	20	1
2012	Playa Baracoa	89	12	3
2012	Playa Baracoa	90	10	1
2012	Playa Baracoa	91	5	1
2012	Playa Baracoa	92	8	6
2012	Playa Baracoa	93	20	1
2012	Playa Baracoa	94	10	4
2012	Playa Baracoa	95	30	8
2012	Playa Baracoa	96	26	5
2012	Playa Baracoa	97	40	16
2012	Playa Baracoa	98	34	12
2012	Playa Baracoa	99	6	1
2012	Playa Baracoa	100	23	6
2012	Playa Baracoa	101	14	1
2012	Playa Baracoa	102	10	1
2012	Playa Baracoa	103	80	1
2012	Playa Baracoa	104	24	1
2012	Playa Baracoa	105	35	5
2012	Playa Baracoa	106	11	1
2012	Playa Baracoa	107	17	1
2012	Playa Baracoa	108	73	23
2012	Playa Baracoa	109	20	3
2012	Playa Baracoa	110	14	7
2012	Playa Baracoa	111	31	10
2012	Playa Baracoa	112	14	8
2012	Playa Baracoa	113	105	64
2012	Playa Baracoa	114	8	1
2012	Playa Baracoa	115	14	2
2012	Playa Baracoa	116	19	15
2012	Playa Baracoa	117	30	1
2012	Playa Baracoa	118	22	12
2012	Playa Baracoa	119	12	10
2012	Playa Baracoa	120	17	10
2012	Playa Baracoa	121	8	3
2012	Playa Baracoa	122	12	3
2012	Playa Baracoa	123	15	10
2012	Playa Baracoa	124	17	1
2012	Playa Baracoa	125	17	1
2012	Playa Baracoa	126	5	1
2012	Playa Baracoa	127	5	1
2012	Playa Baracoa	128	36	1
2012	Playa Baracoa	129	18	1
2012	Playa Baracoa	130	24	5
2012	Playa Baracoa	131	23	3
2012	Playa Baracoa	132	8	1
2012	Playa Baracoa	133	5	1
2012	Playa Baracoa	134	6	1
2012	Playa Baracoa	135	26	8
2012	Playa Baracoa	136	3	1
2012	Playa Baracoa	137	8	1
2012	Playa Baracoa	138	15	1
2012	Playa Baracoa	139	30	20
2012	Playa Baracoa	140	80	27
2012	Playa Baracoa	141	14	1
2012	Playa Baracoa	142	14	1
2012	Playa Baracoa	143	8	1
2012	Playa Baracoa	144	2	1
2012	Playa Baracoa	145	15	4
2012	Playa Baracoa	146	14	5
2012	Playa Baracoa	147	10	1
2012	Playa Baracoa	148	14	3
2012	Playa Baracoa	149	44	8
2012	Playa Baracoa	150	14	3
2012	Playa Baracoa	151	89	5
2012	Playa Baracoa	152	3	6
2012	Playa Baracoa	153	13	10
2012	Playa Baracoa	154	8	2
2012	Playa Baracoa	155	10	1
2012	Playa Baracoa	156	18	1
2012	Playa Baracoa	157	7	1
2012	Playa Baracoa	158	5	2
2012	Playa Baracoa	159	13	4
2012	Playa Baracoa	160	60	30
2012	Playa Baracoa	161	16	3
2012	Playa Baracoa	162	8	1
2012	Playa Baracoa	163	14	6
2012	Playa Baracoa	164	11	4
2012	Playa Baracoa	165	3	1
2012	Playa Baracoa	166	5	1
2012	Playa Baracoa	167	10	1
2012	Playa Baracoa	168	5	1
2012	Playa Baracoa	169	4	1
2012	Playa Baracoa	170	6	8
2012	Playa Baracoa	171	2	2
2012	Playa Baracoa	172	1	1
2012	Playa Baracoa	173	30	20
2012	Playa Baracoa	174	125	40
2012	Playa Baracoa	175	190	77
2012	Playa Baracoa	176	210	80
2012	Playa Baracoa	177	230	60
2012	Playa Baracoa	178	220	30
2012	Playa Baracoa	179	13	1
2012	Playa Baracoa	180	9	1
2012	Playa Baracoa	181	5	1
2012	Playa Baracoa	182	7	1
2012	Playa Baracoa	183	14	1
2012	Playa Baracoa	184	11	1
2012	Playa Baracoa	185	6	1
2013	Playa Baracoa	1	52	40
2013	Playa Baracoa	2	71	52
2013	Playa Baracoa	3	63	22
2013	Playa Baracoa	4	45	73
2013	Playa Baracoa	5	19	4
2013	Playa Baracoa	6	51	4
2013	Playa Baracoa	7	94	10
2013	Playa Baracoa	8	46	13
2013	Playa Baracoa	9	6	2
2013	Playa Baracoa	10	17	3
2013	Playa Baracoa	11	9	3
2013	Playa Baracoa	12	20	2
2013	Playa Baracoa	13	11	3
2013	Playa Baracoa	14	4	12
2013	Playa Baracoa	15	3	1
2013	Playa Baracoa	16	26	11
2013	Playa Baracoa	17	233	68
2013	Playa Baracoa	18	12	3
2013	Playa Baracoa	19	13	4
2013	Playa Baracoa	20	216	63
2013	Playa Baracoa	21	3	2
2013	Playa Baracoa	22	27	6
2013	Playa Baracoa	23	52	36
2013	Playa Baracoa	24	70	16
2013	Playa Baracoa	25	12	3
2013	Playa Baracoa	26	16	6
2013	Playa Baracoa	27	70	21
2013	Playa Baracoa	28	51	6
2013	Playa Baracoa	29	10	3
2013	Playa Baracoa	30	9	2
2013	Playa Baracoa	31	48	22
2013	Playa Baracoa	32	207	29
2013	Playa Baracoa	33	5	3
2013	Playa Baracoa	34	3	1
2013	Playa Baracoa	35	6	2
2013	Playa Baracoa	36	206	100
2013	Playa Baracoa	37	42	16
2013	Playa Baracoa	38	24	9
2013	Playa Baracoa	39	77	21
2013	Playa Baracoa	40	3	1
2013	Playa Baracoa	41	7	3
2013	Playa Baracoa	42	9	3
2013	Playa Baracoa	43	13	3
2013	Playa Baracoa	44	37	4
2013	Playa Baracoa	45	12	6
2013	Playa Baracoa	46	5	2
2013	Playa Baracoa	47	10	2
2013	Playa Baracoa	48	72	14
2013	Playa Baracoa	49	96	20
2013	Playa Baracoa	50	10	2
2013	Playa Baracoa	51	16	3
2013	Playa Baracoa	52	10	2
2013	Playa Baracoa	53	38	5
2013	Playa Baracoa	54	54	16
2013	Playa Baracoa	55	2	1
2013	Playa Baracoa	56	7	2
2013	Playa Baracoa	57	14	3
2013	Playa Baracoa	58	55	50
2013	Playa Baracoa	59	30	6
2013	Playa Baracoa	60	10	3
2013	Playa Baracoa	61	23	5
2013	Playa Baracoa	62	26	12
2013	Playa Baracoa	63	10	2
2013	Playa Baracoa	64	120	18
2013	Playa Baracoa	65	139	72
2013	Playa Baracoa	66	9	1
2013	Playa Baracoa	67	7	3
2013	Playa Baracoa	68	2	1
2013	Playa Baracoa	69	5	1
2013	Playa Baracoa	70	25	3
2013	Playa Baracoa	71	55	12
2013	Playa Baracoa	72	6	3
2013	Playa Baracoa	73	31	7
2013	Playa Baracoa	74	50	1
2013	Playa Baracoa	75	16	1
2013	Playa Baracoa	76	2	1
2013	Playa Baracoa	77	4	1
2013	Playa Baracoa	78	17	1
2013	Playa Baracoa	79	21	10
2013	Playa Baracoa	80	4	1
2013	Playa Baracoa	81	21	1
2013	Playa Baracoa	82	29	3
2013	Playa Baracoa	83	36	1
2013	Playa Baracoa	84	74	45
2013	Playa Baracoa	85	32	28
2013	Playa Baracoa	86	13	1
2013	Playa Baracoa	87	3	1
2013	Playa Baracoa	88	4	1
2013	Playa Baracoa	89	25	5
2013	Playa Baracoa	90	14	1
2013	Playa Baracoa	91	20	3
2013	Playa Baracoa	92	10	1
2013	Playa Baracoa	93	14	1
2013	Playa Baracoa	94	11	1
2013	Playa Baracoa	95	6	1
2013	Playa Baracoa	96	5	1
2013	Playa Baracoa	97	3	1
2013	Playa Baracoa	98	2	1
2013	Playa Baracoa	99	5	1
2013	Playa Baracoa	100	5	1
2013	Playa Baracoa	101	23	8
2013	Playa Baracoa	102	14	10
2013	Playa Baracoa	103	12	1
2013	Playa Baracoa	104	20	5
2013	Playa Baracoa	105	21	6
2013	Playa Baracoa	106	22	6
2013	Playa Baracoa	107	7	1
2013	Playa Baracoa	108	9	6
2013	Playa Baracoa	109	147	19
2013	Playa Baracoa	110	38	5
2013	Playa Baracoa	111	60	20
2013	Playa Baracoa	112	40	3
2013	Playa Baracoa	113	12	4
2013	Playa Baracoa	114	24	1
2013	Playa Baracoa	115	18	1
2013	Playa Baracoa	116	20	4
2013	Playa Baracoa	117	70	43
2013	Playa Baracoa	118	1	1
2013	Playa Baracoa	119	1	5
2013	Playa Baracoa	120	4	1
2013	Playa Baracoa	121	7	1
2013	Playa Baracoa	122	29	3
2013	Playa Baracoa	123	280	100
2013	Playa Baracoa	124	62	25
2013	Playa Baracoa	125	131	83
2013	Playa Baracoa	126	57	27
2013	Playa Baracoa	127	320	70
2013	Playa Baracoa	128	22	12
2013	Playa Baracoa	129	67	10
2013	Playa Baracoa	130	36	7
2013	Playa Baracoa	131	48	14
2013	Playa Baracoa	132	9	5
2013	Playa Baracoa	133	10	3
2013	Playa Baracoa	134	11	3
2013	Playa Baracoa	135	22	6
2013	Playa Baracoa	136	36	11
2013	Playa Baracoa	137	12	3
2013	Playa Baracoa	138	15	6
2013	Playa Baracoa	139	10	6
2013	Playa Baracoa	140	6	3
2013	Playa Baracoa	141	26	6
2013	Playa Baracoa	142	53	7
2013	Playa Baracoa	143	2	1
2013	Playa Baracoa	144	3	2
2013	Playa Baracoa	145	6	2
2013	Playa Baracoa	146	7	3
2013	Playa Baracoa	147	37	14
2013	Playa Baracoa	148	9	4
2013	Playa Baracoa	149	19	5
2013	Playa Baracoa	150	8	3
2013	Playa Baracoa	151	90	38
2013	Playa Baracoa	152	221	23
2013	Playa Baracoa	153	2	1
2013	Playa Baracoa	154	2	1
2013	Playa Baracoa	155	25	4
2013	Playa Baracoa	156	32	6
2013	Playa Baracoa	157	8	2
2013	Playa Baracoa	158	3	3
2013	Playa Baracoa	159	11	4
2013	Playa Baracoa	160	5	2
2013	Playa Baracoa	161	9	3
2013	Playa Baracoa	162	4	2
2013	Playa Baracoa	163	13	4
2013	Playa Baracoa	164	29	12
2013	Playa Baracoa	165	17	9
2013	Playa Baracoa	166	13	3
2013	Playa Baracoa	167	26	4
2013	Playa Baracoa	168	19	4
2013	Playa Baracoa	169	10	3
2013	Playa Baracoa	170	29	5
2013	Playa Baracoa	171	5	2
2013	Playa Baracoa	172	13	3
2013	Playa Baracoa	173	26	13
2013	Playa Baracoa	174	64	31
2013	Playa Baracoa	175	3	1
2013	Playa Baracoa	176	191	33
2013	Playa Baracoa	177	54	27
2013	Playa Baracoa	178	86	31
2013	Playa Baracoa	179	65	21
2013	Playa Baracoa	180	77	50
2013	Playa Baracoa	181	16	4
2013	Playa Baracoa	182	79	35
2013	Playa Baracoa	183	37	22
2013	Playa Baracoa	184	43	17
2013	Playa Baracoa	185	29	11
2013	Playa Baracoa	186	213	46
2013	Playa Baracoa	187	16	5
2013	Playa Baracoa	188	22	5
2013	Playa Baracoa	189	1	1
2013	Playa Baracoa	190	3	1
2013	Playa Baracoa	191	17	4
2013	Playa Baracoa	192	6	5
2013	Playa Baracoa	193	39	11
2013	Playa Baracoa	194	17	6
2013	Playa Baracoa	195	25	7
2013	Playa Baracoa	196	36	21
2013	Playa Baracoa	197	208	42
2013	Playa Baracoa	198	40	20
2013	Playa Baracoa	199	6	3
2013	Playa Baracoa	200	29	12
2013	Playa Baracoa	201	18	20
2013	Playa Baracoa	202	35	13
2013	Playa Baracoa	203	20	19
2013	Playa Baracoa	204	49	26
2013	Playa Baracoa	205	36	20
2013	Playa Baracoa	206	12	5
2013	Playa Baracoa	207	21	9
2013	Playa Baracoa	208	42	50
2013	Playa Baracoa	209	43	24
2013	Playa Baracoa	210	21	16
2013	Playa Baracoa	211	49	16
2013	Playa Baracoa	212	35	16
2013	Playa Baracoa	213	6	4
2013	Playa Baracoa	214	10	3
2013	Playa Baracoa	215	91	44
2013	Playa Baracoa	216	16	19
2013	Playa Baracoa	217	13	4
2013	Playa Baracoa	218	10	1
2013	Playa Baracoa	219	29	10
2013	Playa Baracoa	220	13	3
2013	Playa Baracoa	221	242	14
2013	Playa Baracoa	222	12	4
2013	Playa Baracoa	223	90	50
2013	Playa Baracoa	224	11	3
2013	Playa Baracoa	225	15	3
2013	Playa Baracoa	226	10	1
2013	Playa Baracoa	227	19	3
2013	Playa Baracoa	228	6	1
2013	Playa Baracoa	229	10	3
2013	Playa Baracoa	230	13	1
2013	Playa Baracoa	231	11	1
2013	Playa Baracoa	232	250	80
2013	Playa Baracoa	233	26	8
2013	Playa Baracoa	234	10	4
2013	Playa Baracoa	235	33	26
2013	Playa Baracoa	236	64	18
2013	Playa Baracoa	237	31	1
2013	Playa Baracoa	238	19	2
2013	Playa Baracoa	239	31	9
2013	Playa Baracoa	240	14	1
2013	Playa Baracoa	241	10	1
2013	Playa Baracoa	242	7	3
2013	Playa Baracoa	243	5	1
2013	Playa Baracoa	244	34	12
2013	Playa Baracoa	245	17	1
2013	Playa Baracoa	246	8	1
2013	Playa Baracoa	247	8	1
2013	Playa Baracoa	248	8	1
2013	Playa Baracoa	249	3	1
2013	Playa Baracoa	250	7	1
2013	Playa Baracoa	251	12	1
2013	Playa Baracoa	252	13	1
2013	Playa Baracoa	253	6	1
2013	Playa Baracoa	254	25	9
2013	Playa Baracoa	255	22	10
2013	Playa Baracoa	256	5	1
2013	Playa Baracoa	257	50	27
2013	Playa Baracoa	258	25	5
2013	Playa Baracoa	259	10	3
2013	Playa Baracoa	260	224	5
2013	Playa Baracoa	261	104	48
2013	Playa Baracoa	262	144	47
2013	Playa Baracoa	263	121	70
2013	Playa Baracoa	264	27	12
2013	Playa Baracoa	265	40	22
2013	Playa Baracoa	266	20	1
2013	Playa Baracoa	267	41	6
2013	Playa Baracoa	268	110	49
2013	Playa Baracoa	269	40	15
2013	Playa Baracoa	270	5	1
2013	Playa Baracoa	271	86	23
2013	Playa Baracoa	272	150	87
2013	Playa Baracoa	273	66	3
2013	Playa Baracoa	274	94	12
2013	Playa Baracoa	275	52	13
2013	Playa Baracoa	276	40	14
2013	Playa Baracoa	277	8	1
2013	Playa Baracoa	278	14	1
2013	Playa Baracoa	279	40	11
2013	Playa Baracoa	280	10	3
2013	Playa Baracoa	281	2	1
2013	Playa Baracoa	282	50	9
2013	Playa Baracoa	283	42	8
2013	Playa Baracoa	284	7	1
2013	Playa Baracoa	285	43	14
2013	Playa Baracoa	286	41	15
2013	Playa Baracoa	287	25	10
2013	Playa Baracoa	288	48	20
2013	Playa Baracoa	289	5	1
2013	Playa Baracoa	290	77	11
2013	Playa Baracoa	291	44	21
2013	Playa Baracoa	292	110	20
2013	Playa Baracoa	293	54	15
2013	Playa Baracoa	294	35	10
2013	Playa Baracoa	295	51	1
2013	Playa Baracoa	296	22	1
2013	Playa Baracoa	297	19	12
2013	Playa Baracoa	298	42	1
2013	Playa Baracoa	299	56	17
2013	Playa Baracoa	300	50	14
2013	Playa Baracoa	301	19	3
2013	Playa Baracoa	302	8	1
2013	Playa Baracoa	303	9	1
2013	Playa Baracoa	304	6	1
2013	Playa Baracoa	305	39	12
2013	Playa Baracoa	306	20	15
2013	Playa Baracoa	307	7	1
2013	Playa Baracoa	308	62	14
2013	Playa Baracoa	309	37	10
2013	Playa Baracoa	310	10	1
2013	Playa Baracoa	311	10	1
2013	Playa Baracoa	312	15	1
2013	Playa Baracoa	313	16	1
2013	Playa Baracoa	314	40	17
2013	Playa Baracoa	315	8	1
2013	Playa Baracoa	316	20	9
2013	Playa Baracoa	317	22	1
2013	Playa Baracoa	318	29	1
2013	Playa Baracoa	319	15	1
2013	Playa Baracoa	320	10	1
2013	Playa Baracoa	321	12	1
2013	Playa Baracoa	322	8	1
2013	Playa Baracoa	323	10	1
2013	Playa Baracoa	324	20	1
2013	Playa Baracoa	325	34	10
2013	Playa Baracoa	326	28	2
2013	Playa Baracoa	327	15	7
2013	Playa Baracoa	328	14	9
2013	Playa Baracoa	329	14	7
2013	Playa Baracoa	330	18	1
2013	Playa Baracoa	331	52	24
2013	Playa Baracoa	332	12	2
2013	Playa Baracoa	333	12	3
2013	Playa Baracoa	334	20	11
2013	Playa Baracoa	335	35	10
2013	Playa Baracoa	336	20	11
2013	Playa Baracoa	337	7	1
2013	Playa Baracoa	338	10	1
2013	Playa Baracoa	339	14	8
2013	Playa Baracoa	340	5	1
2013	Playa Baracoa	341	12	1
2013	Playa Baracoa	342	13	1
2013	Playa Baracoa	343	13	7
2013	Playa Baracoa	344	14	1
2013	Playa Baracoa	345	29	14
2013	Playa Baracoa	346	20	5
2013	Playa Baracoa	347	12	1
2013	Playa Baracoa	348	5	1
2013	Playa Baracoa	349	7	1
2013	Playa Baracoa	350	57	24
2013	Playa Baracoa	351	34	10
2013	Playa Baracoa	352	30	15
2013	Playa Baracoa	353	7	1
2013	Playa Baracoa	354	24	1
2013	Playa Baracoa	355	47	18
2013	Playa Baracoa	356	120	50
2013	Playa Baracoa	357	100	5
2013	Playa Baracoa	358	30	1
2013	Playa Baracoa	359	18	1
2013	Playa Baracoa	360	67	1
2013	Playa Baracoa	361	71	27
2013	Playa Baracoa	362	125	22
2013	Playa Baracoa	363	22	14
2013	Playa Baracoa	364	12	1
2013	Playa Baracoa	365	9	13
2013	Playa Baracoa	366	19	14
2013	Playa Baracoa	367	7	3
2013	Playa Baracoa	368	13	4
2013	Playa Baracoa	369	7	6
2013	Playa Baracoa	370	19	12
2013	Playa Baracoa	371	15	9
2013	Playa Baracoa	372	11	4
2013	Playa Baracoa	373	33	9
2013	Playa Baracoa	374	20	14
2013	Playa Baracoa	375	2	8
2013	Playa Baracoa	376	4	12
2013	Playa Baracoa	377	3	2
2013	Playa Baracoa	378	8	6
2013	Playa Baracoa	379	12	10
2013	Playa Baracoa	380	3	1
2013	Playa Baracoa	381	4	3
2013	Playa Baracoa	382	22	13
2013	Playa Baracoa	383	17	9
2013	Playa Baracoa	384	33	22
2013	Playa Baracoa	385	4	2
2013	Playa Baracoa	386	12	7
2013	Playa Baracoa	387	18	8
2013	Playa Baracoa	388	21	13
2013	Playa Baracoa	389	6	2
2013	Playa Baracoa	390	8	4
2013	Playa Baracoa	391	17	9
2013	Playa Baracoa	392	66	23
2013	Playa Baracoa	393	44	49
2013	Playa Baracoa	394	250	87
2013	Playa Baracoa	395	39	17
2013	Playa Baracoa	396	44	45
2013	Playa Baracoa	397	31	7
2013	Playa Baracoa	398	8	1
2013	Playa Baracoa	399	10	1
2013	Playa Baracoa	400	8	1
2013	Playa Baracoa	401	13	1
2013	Playa Baracoa	402	23	7
2013	Playa Baracoa	403	39	24
2013	Playa Baracoa	404	10	1
2013	Playa Baracoa	405	8	10
2013	Playa Baracoa	406	70	14
2013	Playa Baracoa	407	11	2
2013	Playa Baracoa	408	16	1
2013	Playa Baracoa	409	16	1
2013	Playa Baracoa	410	20	9
2013	Playa Baracoa	411	33	8
2013	Playa Baracoa	412	55	26
2013	Playa Baracoa	413	25	8
2013	Playa Baracoa	414	31	12
2013	Playa Baracoa	415	57	21
2013	Playa Baracoa	416	17	8
2013	Playa Baracoa	417	31	8
2013	Playa Baracoa	418	20	1
2013	Playa Baracoa	419	36	12
2013	Playa Baracoa	420	4	1
2013	Playa Baracoa	421	13	1
2013	Playa Baracoa	422	15	2
2013	Playa Baracoa	423	10	1
2013	Playa Baracoa	424	10	1
2013	Playa Baracoa	425	17	1
2013	Playa Baracoa	426	12	1
2013	Playa Baracoa	427	74	43
2013	Playa Baracoa	428	58	25
2013	Playa Baracoa	429	8	1
2013	Playa Baracoa	430	16	1
2013	Playa Baracoa	431	10	1
2013	Playa Baracoa	432	34	17
2015	Playa Baracoa	1	120	30
2015	Playa Baracoa	2	55	10
2015	Playa Baracoa	3	40	10
2015	Playa Baracoa	4	40	20
2015	Playa Baracoa	5	60	20
2015	Playa Baracoa	6	10	1
2015	Playa Baracoa	7	20	1
2015	Playa Baracoa	8	55	30
2015	Playa Baracoa	9	20	1
2015	Playa Baracoa	10	50	55
2015	Playa Baracoa	11	100	30
2015	Playa Baracoa	12	140	40
2015	Playa Baracoa	13	20	1
2015	Playa Baracoa	14	40	1
2015	Playa Baracoa	15	170	90
2015	Playa Baracoa	16	4	1
2015	Playa Baracoa	17	56	4
2015	Playa Baracoa	18	30	5
2015	Playa Baracoa	19	4	12
2015	Playa Baracoa	20	57	22
2015	Playa Baracoa	21	20	12
2015	Playa Baracoa	22	85	50
2015	Playa Baracoa	23	14	1
2015	Playa Baracoa	24	57	22
2015	Playa Baracoa	25	130	120
2015	Playa Baracoa	26	60	20
2015	Playa Baracoa	27	130	10
2015	Playa Baracoa	28	110	30
2015	Playa Baracoa	29	10	3
2015	Playa Baracoa	30	65	20
2015	Playa Baracoa	31	44	16
2015	Playa Baracoa	32	24	1
2015	Playa Baracoa	33	35	11
2015	Playa Baracoa	34	24	15
2015	Playa Baracoa	35	54	1
2015	Playa Baracoa	36	19	1
2015	Playa Baracoa	37	85	31
2015	Playa Baracoa	38	9	1
2015	Playa Baracoa	39	19	11
2015	Playa Baracoa	40	29	1
2015	Playa Baracoa	41	28	2
2015	Playa Baracoa	42	24	11
2015	Playa Baracoa	43	32	12
2015	Playa Baracoa	44	18	1
2015	Playa Baracoa	45	9	1
2015	Playa Baracoa	46	13	1
2015	Playa Baracoa	47	23	1
2015	Playa Baracoa	48	83	1
2015	Playa Baracoa	49	62	2
2015	Playa Baracoa	50	43	1
2015	Playa Baracoa	51	19	1
2015	Playa Baracoa	52	2	1
2015	Playa Baracoa	53	49	1
2015	Playa Baracoa	54	5	1
2015	Playa Baracoa	55	74	2
2015	Playa Baracoa	56	56	1
2015	Playa Baracoa	57	33	1
2015	Playa Baracoa	58	5	1
2015	Playa Baracoa	59	8	1
2015	Playa Baracoa	60	16	1
2015	Playa Baracoa	61	3	1
2015	Playa Baracoa	62	19	1
2015	Playa Baracoa	63	6	1
2015	Playa Baracoa	64	3	1
2015	Playa Baracoa	65	22	1
2015	Playa Baracoa	66	78	4
2015	Playa Baracoa	67	7	1
2015	Playa Baracoa	68	7	1
2015	Playa Baracoa	69	175	62
2015	Playa Baracoa	70	26	11
2015	Playa Baracoa	71	8	1
2015	Playa Baracoa	72	7	1
2015	Playa Baracoa	73	19	6
2015	Playa Baracoa	74	36	1
2015	Playa Baracoa	75	15	1
2015	Playa Baracoa	76	19	1
2015	Playa Baracoa	77	13	1
2015	Playa Baracoa	78	11	1
2015	Playa Baracoa	79	4	1
2015	Playa Baracoa	80	24	1
2015	Playa Baracoa	81	38	4
2015	Playa Baracoa	82	22	4
2015	Playa Baracoa	83	39	1
2015	Playa Baracoa	84	22	1
2015	Playa Baracoa	85	32	1
2015	Playa Baracoa	86	2	1
2015	Playa Baracoa	87	5	1
2015	Playa Baracoa	88	4	1
2015	Playa Baracoa	89	8	1
2015	Playa Baracoa	90	15	1
2015	Playa Baracoa	91	35	1
2015	Playa Baracoa	92	26	2
2015	Playa Baracoa	93	18	1
2015	Playa Baracoa	94	6	2
2015	Playa Baracoa	95	7	1
2015	Playa Baracoa	96	13	1
2015	Playa Baracoa	97	17	1
2015	Playa Baracoa	98	25	1
2015	Playa Baracoa	99	12	1
2015	Playa Baracoa	100	14	1
2015	Playa Baracoa	101	19	1
2015	Playa Baracoa	102	16	1
2015	Playa Baracoa	103	4	1
2015	Playa Baracoa	104	36	2
2015	Playa Baracoa	105	57	1
2015	Playa Baracoa	106	6	1
2015	Playa Baracoa	107	6	1
2015	Playa Baracoa	108	5	1
2015	Playa Baracoa	109	17	2
2015	Playa Baracoa	110	18	1
2015	Playa Baracoa	111	10	1
2015	Playa Baracoa	112	8	1
2015	Playa Baracoa	113	67	1
2015	Playa Baracoa	114	140	38
2015	Playa Baracoa	115	33	1
2015	Playa Baracoa	116	160	59
2015	Playa Baracoa	117	69	31
2015	Playa Baracoa	118	14	9
2015	Playa Baracoa	119	110	56
2015	Playa Baracoa	120	24	4
2015	Playa Baracoa	121	19	3
2015	Playa Baracoa	122	13	7
2015	Playa Baracoa	123	26	4
2015	Playa Baracoa	124	4	2
2015	Playa Baracoa	125	15	1
2015	Playa Baracoa	126	2	1
2015	Playa Baracoa	127	17	2
2015	Playa Baracoa	128	4	1
2015	Playa Baracoa	129	20	1
2015	Playa Baracoa	130	12	1
2015	Playa Baracoa	131	30	3
2015	Playa Baracoa	132	28	2
2015	Playa Baracoa	133	20	5
2015	Playa Baracoa	134	20	1
2015	Playa Baracoa	135	25	10
2015	Playa Baracoa	136	28	16
2015	Playa Baracoa	137	66	5
2015	Playa Baracoa	138	50	10
2015	Playa Baracoa	139	40	20
2015	Playa Baracoa	140	4	1
2015	Playa Baracoa	141	15	2
2015	Playa Baracoa	142	10	1
2015	Playa Baracoa	143	2	1
2015	Playa Baracoa	144	13	2
2015	Playa Baracoa	145	6	1
2015	Playa Baracoa	146	20	1
2015	Playa Baracoa	147	5	1
2015	Playa Baracoa	148	15	1
2015	Playa Baracoa	149	18	8
2015	Playa Baracoa	150	31	14
2015	Playa Baracoa	151	6	1
2015	Playa Baracoa	152	10	1
2015	Playa Baracoa	153	10	1
2015	Playa Baracoa	154	15	6
2015	Playa Baracoa	155	15	8
2015	Playa Baracoa	156	13	4
2015	Playa Baracoa	157	14	1
2015	Playa Baracoa	158	4	1
2015	Playa Baracoa	159	3	1
2015	Playa Baracoa	160	16	5
2015	Playa Baracoa	161	10	5
2015	Playa Baracoa	162	4	1
2015	Playa Baracoa	163	7	1
2015	Playa Baracoa	164	8	1
2015	Playa Baracoa	165	19	2
2015	Playa Baracoa	166	50	15
2015	Playa Baracoa	167	140	30
2015	Playa Baracoa	168	4	1
2015	Playa Baracoa	169	13	1
2015	Playa Baracoa	170	24	2
2015	Playa Baracoa	171	12	8
2015	Playa Baracoa	172	6	1
2015	Playa Baracoa	173	8	1
2015	Playa Baracoa	174	11	1
2015	Playa Baracoa	175	60	33
2015	Playa Baracoa	176	25	15
2015	Playa Baracoa	177	10	1
2015	Playa Baracoa	178	22	8
2015	Playa Baracoa	179	35	5
2015	Playa Baracoa	180	38	10
2015	Playa Baracoa	181	120	30
2015	Playa Baracoa	182	6	1
2015	Playa Baracoa	183	2	1
2015	Playa Baracoa	184	7	1
2015	Playa Baracoa	185	13	2
2015	Playa Baracoa	186	14	3
2015	Playa Baracoa	187	3	1
2015	Playa Baracoa	188	17	2
2015	Playa Baracoa	189	33	8
2015	Playa Baracoa	190	4	1
2015	Playa Baracoa	191	9	1
2015	Playa Baracoa	192	42	11
2015	Playa Baracoa	193	93	68
2015	Playa Baracoa	194	22	13
2015	Playa Baracoa	195	5	1
2015	Playa Baracoa	196	14	1
2015	Playa Baracoa	197	27	2
2015	Playa Baracoa	198	43	5
2015	Playa Baracoa	199	19	2
2015	Playa Baracoa	200	8	1
2015	Playa Baracoa	201	4	1
2015	Playa Baracoa	202	100	20
2015	Playa Baracoa	203	26	2
2015	Playa Baracoa	204	12	1
2015	Playa Baracoa	205	8	21
2015	Playa Baracoa	206	3	1
2015	Playa Baracoa	207	14	6
2015	Playa Baracoa	208	5	1
2015	Playa Baracoa	209	7	14
2015	Playa Baracoa	210	56	12
2015	Playa Baracoa	211	29	3
2015	Playa Baracoa	212	11	2
2015	Playa Baracoa	213	23	1
2015	Playa Baracoa	214	43	20
2015	Playa Baracoa	215	10	1
2015	Playa Baracoa	216	26	23
2015	Playa Baracoa	217	22	5
2015	Playa Baracoa	218	6	1
2015	Playa Baracoa	219	10	9
2015	Playa Baracoa	220	15	11
2015	Playa Baracoa	221	12	5
2015	Playa Baracoa	222	21	8
2015	Playa Baracoa	223	20	2
2015	Playa Baracoa	224	18	7
2015	Playa Baracoa	225	9	4
2015	Playa Baracoa	226	14	1
2015	Playa Baracoa	227	14	6
2015	Playa Baracoa	228	6	4
2015	Playa Baracoa	229	6	12
2015	Playa Baracoa	230	2	1
2015	Playa Baracoa	231	32	13
2015	Playa Baracoa	232	24	4
2015	Playa Baracoa	233	11	5
2015	Playa Baracoa	234	21	4
2015	Playa Baracoa	235	4	1
2015	Playa Baracoa	236	16	6
2015	Playa Baracoa	237	27	8
2015	Playa Baracoa	238	19	5
2015	Playa Baracoa	239	5	5
2015	Playa Baracoa	240	23	7
2015	Playa Baracoa	241	13	6
2015	Playa Baracoa	242	20	15
2015	Playa Baracoa	243	12	1
2015	Playa Baracoa	244	8	1
2015	Playa Baracoa	245	4	4
2015	Playa Baracoa	246	53	1
2015	Playa Baracoa	247	13	12
2015	Playa Baracoa	248	9	2
2015	Playa Baracoa	249	66	1
2015	Playa Baracoa	250	10	12
2015	Playa Baracoa	251	43	10
2015	Playa Baracoa	252	30	5
2015	Playa Baracoa	253	27	1
2015	Playa Baracoa	254	51	15
2015	Playa Baracoa	255	5	1
2015	Playa Baracoa	256	15	2
2015	Playa Baracoa	257	3	1
2015	Playa Baracoa	258	30	12
2015	Playa Baracoa	259	6	1
2015	Playa Baracoa	260	46	15
2015	Playa Baracoa	261	2	1
2015	Playa Baracoa	262	53	29
2015	Playa Baracoa	263	26	11
2015	Playa Baracoa	264	7	1
2015	Playa Baracoa	265	54	17
2015	Playa Baracoa	266	16	4
2015	Playa Baracoa	267	24	8
2015	Playa Baracoa	268	20	10
2015	Playa Baracoa	269	15	2
2015	Playa Baracoa	270	8	1
2015	Playa Baracoa	271	20	5
2015	Playa Baracoa	272	53	13
2015	Playa Baracoa	273	3	1
2015	Playa Baracoa	274	30	8
2015	Playa Baracoa	275	9	1
2015	Playa Baracoa	276	40	5
2015	Playa Baracoa	277	24	10
2015	Playa Baracoa	278	8	1
2015	Playa Baracoa	279	25	5
2015	Playa Baracoa	280	37	4
2015	Playa Baracoa	281	160	60
2015	Playa Baracoa	282	27	8
2015	Playa Baracoa	283	18	3
2015	Playa Baracoa	284	20	10
2015	Playa Baracoa	285	110	40
2015	Playa Baracoa	286	6	1
2015	Playa Baracoa	287	120	40
2015	Playa Baracoa	288	4	1
2015	Playa Baracoa	289	130	5
2015	Playa Baracoa	290	14	2
2015	Playa Baracoa	291	40	4
2015	Playa Baracoa	292	52	1
2015	Playa Baracoa	293	65	30
2015	Playa Baracoa	294	10	4
2015	Playa Baracoa	295	5	1
2015	Playa Baracoa	296	16	12
2015	Playa Baracoa	297	11	5
2015	Playa Baracoa	298	32	15
2015	Playa Baracoa	299	25	7
2015	Playa Baracoa	300	43	1
2015	Playa Baracoa	301	2	1
2015	Playa Baracoa	302	22	10
2015	Playa Baracoa	303	160	120
2015	Playa Baracoa	304	4	1
2015	Playa Baracoa	305	8	1
2015	Playa Baracoa	306	20	5
2015	Playa Baracoa	307	34	12
2015	Playa Baracoa	308	3	1
2015	Playa Baracoa	309	15	2
2015	Playa Baracoa	310	4	2
2015	Playa Baracoa	311	44	20
2015	Playa Baracoa	312	4	1
2015	Playa Baracoa	313	38	19
2015	Playa Baracoa	314	44	15
2015	Playa Baracoa	315	4	1
2015	Playa Baracoa	316	43	10
2015	Playa Baracoa	317	10	2
2015	Playa Baracoa	318	28	12
2015	Playa Baracoa	319	14	1
2015	Playa Baracoa	320	63	40
2015	Playa Baracoa	321	45	30
2015	Playa Baracoa	322	10	1
2015	Playa Baracoa	323	4	1
2015	Playa Baracoa	324	66	32
2015	Playa Baracoa	325	10	1
2015	Playa Baracoa	326	14	2
2015	Playa Baracoa	327	84	1
2015	Playa Baracoa	328	14	6
2015	Playa Baracoa	329	33	16
2015	Playa Baracoa	330	41	22
2015	Playa Baracoa	331	17	6
2015	Playa Baracoa	332	22	12
2015	Playa Baracoa	333	46	29
2015	Playa Baracoa	334	11	8
2015	Playa Baracoa	335	30	24
2015	Playa Baracoa	336	44	13
2015	Playa Baracoa	337	33	37
2015	Playa Baracoa	338	39	32
2015	Playa Baracoa	339	14	9
2015	Playa Baracoa	340	13	7
2015	Playa Baracoa	341	8	1
2015	Playa Baracoa	342	78	1
2015	Playa Baracoa	343	103	14
2015	Playa Baracoa	344	42	23
2015	Playa Baracoa	345	64	37
2015	Playa Baracoa	346	27	23
2015	Playa Baracoa	347	143	79
2015	Playa Baracoa	348	30	3
2015	Playa Baracoa	349	50	40
2015	Playa Baracoa	350	50	30
2015	Playa Baracoa	351	10	1
2015	Playa Baracoa	352	28	15
2015	Playa Baracoa	353	100	40
2015	Playa Baracoa	354	15	5
2015	Playa Baracoa	355	10	5
2015	Playa Baracoa	356	60	30
2015	Playa Baracoa	357	20	8
2015	Playa Baracoa	358	48	32
2015	Playa Baracoa	359	5	1
2015	Playa Baracoa	360	20	1
2015	Playa Baracoa	361	8	1
2015	Playa Baracoa	362	20	1
2015	Playa Baracoa	363	110	30
2015	Playa Baracoa	364	30	5
2015	Playa Baracoa	365	30	28
2015	Playa Baracoa	366	8	1
2015	Playa Baracoa	367	5	1
2015	Playa Baracoa	368	6	1
2015	Playa Baracoa	369	32	22
2015	Playa Baracoa	370	22	6
2015	Playa Baracoa	371	25	30
2015	Playa Baracoa	372	25	1
2015	Playa Baracoa	373	20	1
2015	Playa Baracoa	374	15	1
2015	Playa Baracoa	375	30	3
2015	Playa Baracoa	376	10	1
2015	Playa Baracoa	377	15	1
2015	Playa Baracoa	378	30	12
2015	Playa Baracoa	379	10	1
2015	Playa Baracoa	380	8	1
2015	Playa Baracoa	381	10	5
2015	Playa Baracoa	382	15	1
2015	Playa Baracoa	383	14	1
2015	Playa Baracoa	384	9	1
2015	Playa Baracoa	385	30	22
2015	Playa Baracoa	386	35	10
2015	Playa Baracoa	387	40	30
2015	Playa Baracoa	388	28	1
2015	Playa Baracoa	389	52	4
2015	Playa Baracoa	390	48	1
2015	Playa Baracoa	391	100	30
2015	Playa Baracoa	392	55	10
2015	Playa Baracoa	393	76	40
2015	Playa Baracoa	394	63	22
2015	Playa Baracoa	395	8	1
2015	Playa Baracoa	396	16	1
2015	Playa Baracoa	397	72	26
2015	Playa Baracoa	398	38	10
2015	Playa Baracoa	399	66	5
2015	Playa Baracoa	400	12	1
2015	Playa Baracoa	401	8	1
2015	Playa Baracoa	402	18	4
2015	Playa Baracoa	403	22	5
2015	Playa Baracoa	404	22	8
2015	Playa Baracoa	405	10	1
2015	Playa Baracoa	406	34	12
2015	Playa Baracoa	407	28	4
2015	Playa Baracoa	408	3	1
2015	Playa Baracoa	409	4	1
2015	Playa Baracoa	410	20	4
2015	Playa Baracoa	411	3	1
2015	Playa Baracoa	412	4	1
2015	Playa Baracoa	413	5	1
2015	Playa Baracoa	414	2	1
2015	Playa Baracoa	415	22	8
2015	Playa Baracoa	416	6	1
2015	Playa Baracoa	417	4	1
2015	Playa Baracoa	418	30	15
2015	Playa Baracoa	419	12	2
2015	Playa Baracoa	420	22	12
2015	Playa Baracoa	421	36	6
2015	Playa Baracoa	422	2	1
2015	Playa Baracoa	423	56	20
2015	Playa Baracoa	424	6	1
2015	Playa Baracoa	425	4	1
2015	Playa Baracoa	426	110	50
2015	Playa Baracoa	427	14	1
2015	Playa Baracoa	428	20	1
2015	Playa Baracoa	429	2	1
2015	Playa Baracoa	430	3	1
2015	Playa Baracoa	431	3	1
2015	Playa Baracoa	432	16	14
2015	Playa Baracoa	433	37	18
2015	Playa Baracoa	434	16	19
2015	Playa Baracoa	435	48	37
2015	Playa Baracoa	436	16	1
2015	Playa Baracoa	437	28	2
2015	Playa Baracoa	438	36	4
2015	Playa Baracoa	439	69	4
2015	Playa Baracoa	440	21	1
2015	Playa Baracoa	441	12	2
2015	Playa Baracoa	442	143	4
2015	Playa Baracoa	443	18	1
2015	Playa Baracoa	444	9	1
2015	Playa Baracoa	445	5	1
2015	Playa Baracoa	446	15	2
2015	Playa Baracoa	447	78	32
2015	Playa Baracoa	448	57	26
2015	Playa Baracoa	449	46	28
2015	Playa Baracoa	450	80	40
2015	Playa Baracoa	451	40	28
2015	Playa Baracoa	452	5	1
2015	Playa Baracoa	453	75	1
2015	Playa Baracoa	454	8	1
2015	Playa Baracoa	455	7	1
2015	Playa Baracoa	456	60	1
2015	Playa Baracoa	457	7	1
2015	Playa Baracoa	458	25	1
2015	Playa Baracoa	459	15	1
2015	Playa Baracoa	460	50	1
2015	Playa Baracoa	461	30	1
2015	Playa Baracoa	462	10	1
2015	Playa Baracoa	463	24	1
2015	Playa Baracoa	464	14	1
2015	Playa Baracoa	465	45	40
2015	Playa Baracoa	466	60	28
2015	Playa Baracoa	467	7	1
2015	Playa Baracoa	468	7	1
2015	Playa Baracoa	469	90	50
2015	Playa Baracoa	470	25	1
2015	Playa Baracoa	471	110	70
2015	Playa Baracoa	472	90	1
2015	Playa Baracoa	473	4	1
2015	Playa Baracoa	474	12	1
2015	Playa Baracoa	475	4	1
2015	Playa Baracoa	476	7	1
2015	Playa Baracoa	477	4	1
2015	Playa Baracoa	478	10	1
2015	Playa Baracoa	479	20	1
2015	Playa Baracoa	480	4	1
2015	Playa Baracoa	481	12	1
2015	Playa Baracoa	482	6	1
2015	Playa Baracoa	483	15	1
2015	Playa Baracoa	484	7	1
2015	Playa Baracoa	485	15	1
2015	Playa Baracoa	486	20	1
2015	Playa Baracoa	487	3	1
2015	Playa Baracoa	488	9	1
2015	Playa Baracoa	489	32	16
2015	Playa Baracoa	490	56	24
2015	Playa Baracoa	491	43	21
2015	Playa Baracoa	492	22	12
2015	Playa Baracoa	493	16	8
2015	Playa Baracoa	494	2	1
2015	Playa Baracoa	495	85	18
2015	Playa Baracoa	496	26	14
2015	Playa Baracoa	497	17	8
2015	Playa Baracoa	498	28	26
2015	Playa Baracoa	499	25	1
2015	Playa Baracoa	500	20	13
2015	Playa Baracoa	501	33	12
2015	Playa Baracoa	502	2	1
2015	Playa Baracoa	503	30	17
2015	Playa Baracoa	504	8	1
2015	Playa Baracoa	505	3	1
2015	Playa Baracoa	506	9	1
2015	Playa Baracoa	507	5	4
2015	Playa Baracoa	508	10	1
2015	Playa Baracoa	509	27	11
2015	Playa Baracoa	510	3	2
2015	Playa Baracoa	511	11	1
2015	Playa Baracoa	512	51	28
2015	Playa Baracoa	513	19	19
2015	Playa Baracoa	514	30	14
2015	Playa Baracoa	515	43	27
2015	Playa Baracoa	516	54	1
2015	Playa Baracoa	517	29	16
2015	Playa Baracoa	518	69	22
2015	Playa Baracoa	519	16	7
2015	Playa Baracoa	520	64	21
2015	Playa Baracoa	521	23	19
2015	Playa Baracoa	522	18	19
2015	Playa Baracoa	523	21	12
2015	Playa Baracoa	524	12	1
2015	Playa Baracoa	525	4	14
2015	Playa Baracoa	526	8	9
2015	Playa Baracoa	527	91	24
2015	Playa Baracoa	528	17	2
2015	Playa Baracoa	529	8	1
2015	Playa Baracoa	530	364	62
2015	Playa Baracoa	531	67	34
2015	Playa Baracoa	532	210	87
2015	Playa Baracoa	533	130	47
2015	Playa Baracoa	534	16	1
2015	Playa Baracoa	535	16	2
2015	Playa Baracoa	536	7	1
2015	Playa Baracoa	537	7	1
2015	Playa Baracoa	538	16	1
2015	Playa Baracoa	539	3	1
2015	Playa Baracoa	540	38	1
2015	Playa Baracoa	541	18	1
2015	Playa Baracoa	542	44	1
2015	Playa Baracoa	543	17	6
2015	Playa Baracoa	544	7	3
2015	Playa Baracoa	545	110	49
2015	Playa Baracoa	546	7	1
2015	Playa Baracoa	547	21	1
2015	Playa Baracoa	548	26	1
2015	Playa Baracoa	549	40	17
2015	Playa Baracoa	550	36	5
2015	Playa Baracoa	551	29	14
2015	Playa Baracoa	552	44	35
2015	Playa Baracoa	553	47	1
2015	Playa Baracoa	554	10	1
2015	Playa Baracoa	555	3	1
2015	Playa Baracoa	556	47	38
2015	Playa Baracoa	557	26	16
2015	Playa Baracoa	558	8	1
2015	Playa Baracoa	559	28	6
2015	Playa Baracoa	560	31	17
2015	Playa Baracoa	561	11	8
2015	Playa Baracoa	562	23	31
2015	Playa Baracoa	563	11	14
2015	Playa Baracoa	564	22	27
2015	Playa Baracoa	565	8	1
2015	Playa Baracoa	566	170	86
2015	Playa Baracoa	567	38	29
2015	Playa Baracoa	568	6	1
2015	Playa Baracoa	569	51	12
2015	Playa Baracoa	570	18	11
2015	Playa Baracoa	571	27	11
2015	Playa Baracoa	572	167	23
2015	Playa Baracoa	573	28	27
2015	Playa Baracoa	574	23	1
2015	Playa Baracoa	575	21	4
2015	Playa Baracoa	576	24	14
2015	Playa Baracoa	577	58	22
2015	Playa Baracoa	578	13	1
2015	Playa Baracoa	579	17	1
2015	Playa Baracoa	580	6	1
2015	Playa Baracoa	581	6	1
2015	Playa Baracoa	582	9	1
2015	Playa Baracoa	583	8	1
2015	Playa Baracoa	584	14	1
2015	Playa Baracoa	585	19	16
2015	Playa Baracoa	586	79	27
2015	Playa Baracoa	587	20	1
2015	Playa Baracoa	588	30	1
2015	Playa Baracoa	589	15	1
2015	Playa Baracoa	590	30	20
2015	Playa Baracoa	591	15	10
2015	Playa Baracoa	592	13	10
2015	Playa Baracoa	593	10	10
2015	Playa Baracoa	594	40	15
2015	Playa Baracoa	595	10	1
2015	Playa Baracoa	596	7	4
2015	Playa Baracoa	597	25	15
2015	Playa Baracoa	598	50	1
2015	Playa Baracoa	599	110	1
2015	Playa Baracoa	600	6	1
2015	Playa Baracoa	601	25	1
2015	Playa Baracoa	602	30	10
2015	Playa Baracoa	603	40	8
2015	Playa Baracoa	604	55	30
2015	Playa Baracoa	605	35	12
2021	Playa Baracoa	1	94	20
2021	Playa Baracoa	2	20	15
2021	Playa Baracoa	3	23	1
2021	Playa Baracoa	4	15	1
2021	Playa Baracoa	5	16	9
2021	Playa Baracoa	6	5	1
2021	Playa Baracoa	7	19	1
2021	Playa Baracoa	8	32	1
2021	Playa Baracoa	9	18	1
2021	Playa Baracoa	10	17	21
2021	Playa Baracoa	11	44	24
2021	Playa Baracoa	12	8	1
2021	Playa Baracoa	13	44	23
2021	Playa Baracoa	14	13	9
2021	Playa Baracoa	15	16	12
2021	Playa Baracoa	16	8	4
2021	Playa Baracoa	17	23	1
2021	Playa Baracoa	18	39	9
2021	Playa Baracoa	19	11	1
2021	Playa Baracoa	20	46	1
2021	Playa Baracoa	21	6	1
2021	Playa Baracoa	22	147	48
2021	Playa Baracoa	23	19	1
2021	Playa Baracoa	24	44	1
2021	Playa Baracoa	25	10.5	5.5
2021	Playa Baracoa	26	15.2	10.1
2021	Playa Baracoa	27	73.2	32.8
2021	Playa Baracoa	28	10.5	3.8
2021	Playa Baracoa	29	3.9	1.3
2021	Playa Baracoa	30	16.1	11
2021	Playa Baracoa	31	19.8	3.4
2021	Playa Baracoa	32	14.2	4.9
2021	Playa Baracoa	33	7.3	2
2021	Playa Baracoa	34	10.1	8.5
2021	Playa Baracoa	35	21.3	9.3
2021	Playa Baracoa	36	7.8	2.5
2021	Playa Baracoa	37	14.8	5
2021	Playa Baracoa	38	26.2	7.1
2021	Playa Baracoa	39	3.2	2.5
2021	Playa Baracoa	40	26.3	10.8
2021	Playa Baracoa	41	10.4	6.8
[truncated: 2,376 more rows]

## Sheet: Relative abundance of A.pal 
Reef	Year	Size rank (cm)	Abundance according diameter	Total colonies	Relative Abundance (%)
Playa Baracoa	2005	≤ 5	32	280	11.4286
Playa Baracoa	2006	≤ 5	20	456	4.38596
Playa Baracoa	2012	≤ 5	15	185	8.10811
Playa Baracoa	2013	≤ 5	49	432	11.3426
Playa Baracoa	2015	≤ 5	76	605	12.562
Playa Baracoa	2021	≤ 5	61	623	9.79133
Rincon de Guanabo	2006	≤ 5	40	456	8.77193
Rincon de Guanabo	2015	≤ 5	62	600	10.3333
Rincon de Guanabo	2021	≤ 5	143	738	19.3767
Playa Baracoa	2005	> 5 - ≤10	58	280	20.7143
Playa Baracoa	2006	> 5 - ≤10	76	456	16.6667
Playa Baracoa	2012	> 5 - ≤10	27	185	14.5946
Playa Baracoa	2013	> 5 - ≤10	81	432	18.75
Playa Baracoa	2015	> 5 - ≤10	103	605	17.0248
Playa Baracoa	2021	> 5 - ≤10	117	623	18.7801
Rincon de Guanabo	2006	> 5 - ≤10	64	456	14.0351
Rincon de Guanabo	2015	> 5 - ≤10	101	600	16.8333
Rincon de Guanabo	2021	> 5 - ≤10	133	738	18.0217
Playa Baracoa	2005	> 10 - ≤50	98	280	35
Playa Baracoa	2006	> 10 - ≤51	235	456	51.5351
Playa Baracoa	2012	> 10 - ≤52	72	185	38.9189
Playa Baracoa	2013	> 10 - ≤53	224	432	51.8519
Playa Baracoa	2015	> 10 - ≤54	327	605	54.0496
Playa Baracoa	2021	> 10 - ≤55	356	623	57.1429
Rincon de Guanabo	2006	> 10 - ≤56	259	456	56.7982
Rincon de Guanabo	2015	> 10 - ≤57	292	600	48.6667
Rincon de Guanabo	2021	> 10 - ≤50	397	738	53.794
Playa Baracoa	2005	> 50	92	280	32.8571
Playa Baracoa	2006	> 50	125	456	27.4123
Playa Baracoa	2012	> 50	71	185	38.3784
Playa Baracoa	2013	> 50	78	432	18.0556
Playa Baracoa	2015	> 50	99	605	16.3636
Playa Baracoa	2021	> 50	89	623	14.2857
Rincon de Guanabo	2006	> 50	93	456	20.3947
Rincon de Guanabo	2015	> 50	145	600	24.1667
Rincon de Guanabo	2021	> 50	65	738	8.80759

## Sheet: Prevalence of unhealthy colonie
Year	Reef	Affectation	Number of affected colonies	Total colonies	Prevalence of affectation
2005	Playa Baracoa	Bl	0	280	0		Bl	Bleaching
2005	Playa Baracoa	OM	78		0.278571		OM	old mortality
2005	Playa Baracoa	RM	0		0		RM	recent mortality
2005	Playa Baracoa	BIO	0		0		BIO	bioeronding
2006	Playa Baracoa	Bl	23	456	0.0504386
2006	Playa Baracoa	OM	152		0.333333
2006	Playa Baracoa	RM	11		0.0241228
2006	Playa Baracoa	BIO	0		0
2012	Playa Baracoa	Bl	0	185	0
2012	Playa Baracoa	OM	69		0.359375
2012	Playa Baracoa	RM	21		0.109375
2012	Playa Baracoa	BIO	0		0
2013	Playa Baracoa	Bl	5	432	0.0114416
2013	Playa Baracoa	OM	104		0.237986
2013	Playa Baracoa	RM	28		0.0640732
2013	Playa Baracoa	BIO	0		0
2015	Playa Baracoa	Bl	22	605	0.0359477
2015	Playa Baracoa	OM	68		0.111111
2015	Playa Baracoa	RM	19		0.0310458
2015	Playa Baracoa	BIO	130		0.212418
2016	Playa Baracoa	Bl	109	600	0.181667
2016	Playa Baracoa	OM	127		0.211667
2016	Playa Baracoa	RM	16		0.0266667
2016	Playa Baracoa	BIO	109		0.181667
2017	Playa Baracoa	Bl	19	742	0.0256065
2017	Playa Baracoa	OM	128		0.172507
2017	Playa Baracoa	RM	41		0.0552561
2017	Playa Baracoa	BIO	148		0.199461
2021	Playa Baracoa	Bl	12	623	0.0192616
2021	Playa Baracoa	OM	27		0.0433387
2021	Playa Baracoa	RM	3		0.00481541
2021	Playa Baracoa	BIO	125		0.200642
2006	Rincon de Guanabo	Bl	13	456	0.0285088
2006	Rincon de Guanabo	OM	54		0.118421
2006	Rincon de Guanabo	RM	6		0.0131579
2006	Rincon de Guanabo	BIO	0		0
2015	Rincon de Guanabo	Bl	50	600	0.0833333
2015	Rincon de Guanabo	OM	76		0.126667
2015	Rincon de Guanabo	RM	21		0.035
2015	Rincon de Guanabo	BIO	84		0.14
2016	Rincon de Guanabo	Bl	110	600	0.183333
2016	Rincon de Guanabo	OM	81		0.135
2016	Rincon de Guanabo	RM	23		0.0383333
2016	Rincon de Guanabo	BIO	117		0.195
2017	Rincon de Guanabo	Bl	111	1442	0.0769764
2017	Rincon de Guanabo	OM	161		0.11165
2017	Rincon de Guanabo	RM	73		0.0506241
2017	Rincon de Guanabo	BIO	216		0.149792
2021	Rincon de Guanabo	Bl	15	738	0.0203252
2021	Rincon de Guanabo	OM	47		0.0636856
2021	Rincon de Guanabo	RM	6		0.00813008
2021	Rincon de Guanabo	BIO	44		0.0596206

## Sheet: Cover
Reef	Year	Category	Station	Transect	Cover
Playa Baracoa	2015	Alga	E1	1	37
Playa Baracoa	2015	Alga	E1	2	25
Playa Baracoa	2015	Alga	E1	3	37
Playa Baracoa	2015	Alga	E1	4	44
Playa Baracoa	2015	Alga	E1	5	49
Playa Baracoa	2015	Alga	E1	6	43
Playa Baracoa	2015	Alga	E1	7	43
Playa Baracoa	2015	Alga	E1	8	26
Playa Baracoa	2015	Alga	E1	9	33
Playa Baracoa	2015	Alga	E1	10	49
Playa Baracoa	2015	Alga	E2	1	50
Playa Baracoa	2015	Alga	E2	2	53
Playa Baracoa	2015	Alga	E2	3	68
Playa Baracoa	2015	Alga	E2	4	68
Playa Baracoa	2015	Alga	E2	5	36
Playa Baracoa	2015	Alga	E2	6	63
Playa Baracoa	2015	Alga	E2	7	53
Playa Baracoa	2015	Alga	E2	8	56
Playa Baracoa	2015	Alga	E2	9	38
Playa Baracoa	2015	Alga	E2	10	48
Playa Baracoa	2015	Alga	E3	1	36
Playa Baracoa	2015	Alga	E3	2	19
Playa Baracoa	2015	Alga	E3	3	57
Playa Baracoa	2015	Alga	E3	4	34
Playa Baracoa	2015	Alga	E3	5	26
Playa Baracoa	2015	Alga	E3	6	33
Playa Baracoa	2015	Alga	E3	7	47
Playa Baracoa	2015	Alga	E3	8	63
Playa Baracoa	2015	Alga	E3	9	75
Playa Baracoa	2015	Alga	E3	10	29
Playa Baracoa	2015	Alga	E4	1	29
Playa Baracoa	2015	Alga	E4	2	55
Playa Baracoa	2015	Alga	E4	3	62
Playa Baracoa	2015	Alga	E4	4	22
Playa Baracoa	2015	Alga	E4	5	77
Playa Baracoa	2015	Alga	E4	6	82
Playa Baracoa	2015	Alga	E4	7	85
Playa Baracoa	2015	Alga	E4	8	53
Playa Baracoa	2015	Alga	E4	9	70
Playa Baracoa	2015	Alga	E4	10	53
Playa Baracoa	2015	Alga	E5	1	70
Playa Baracoa	2015	Alga	E5	2	50
Playa Baracoa	2015	Alga	E5	3	51
Playa Baracoa	2015	Alga	E5	4	46
Playa Baracoa	2015	Alga	E5	5	60
Playa Baracoa	2015	Alga	E5	6	37
Playa Baracoa	2015	Alga	E5	7	18
Playa Baracoa	2015	Alga	E5	8	19
Playa Baracoa	2015	Alga	E5	9	50
Playa Baracoa	2015	Alga	E5	10	29
Playa Baracoa	2015	Alga	E6	1	47
Playa Baracoa	2015	Alga	E6	2	57
Playa Baracoa	2015	Alga	E6	3	49
Playa Baracoa	2015	Alga	E6	4	23
Playa Baracoa	2015	Alga	E6	5	42
Playa Baracoa	2015	Alga	E6	6	15
Playa Baracoa	2015	Alga	E6	7	20
Playa Baracoa	2015	Alga	E6	8	12
Playa Baracoa	2015	Alga	E6	9	26
Playa Baracoa	2015	Alga	E6	10	25
Playa Baracoa	2021	Alga	E1	1	91.2
Playa Baracoa	2021	Alga	E1	2	93.5
Playa Baracoa	2021	Alga	E1	3	88.8
Playa Baracoa	2021	Alga	E1	4	95.6
Playa Baracoa	2021	Alga	E1	5	91.7
Playa Baracoa	2021	Alga	E1	6	87
Playa Baracoa	2021	Alga	E1	7	83.5
Playa Baracoa	2021	Alga	E1	8	86
Playa Baracoa	2021	Alga	E1	9	89
Playa Baracoa	2021	Alga	E1	10	91
Playa Baracoa	2021	Alga	E2	1	88.5
Playa Baracoa	2021	Alga	E2	2	89
Playa Baracoa	2021	Alga	E2	3	64.2
Playa Baracoa	2021	Alga	E2	4	91.2
Playa Baracoa	2021	Alga	E2	5	91
Playa Baracoa	2021	Alga	E2	6	87.4
Playa Baracoa	2021	Alga	E2	7	84.3
Playa Baracoa	2021	Alga	E2	8	94
Playa Baracoa	2021	Alga	E2	9	92
Playa Baracoa	2021	Alga	E2	10	92
Playa Baracoa	2021	Alga	E3	1	97.5
Playa Baracoa	2021	Alga	E3	2	82.4
Playa Baracoa	2021	Alga	E3	3	90.2
Playa Baracoa	2021	Alga	E3	4	81.8
Playa Baracoa	2021	Alga	E3	5	79
Playa Baracoa	2021	Alga	E3	6	75
Playa Baracoa	2021	Alga	E3	7	90.3
Playa Baracoa	2021	Alga	E3	8	89
Playa Baracoa	2021	Alga	E3	9	89
Playa Baracoa	2021	Alga	E3	10	83
Playa Baracoa	2021	Alga	E4	1	83
Playa Baracoa	2021	Alga	E4	2	79
Playa Baracoa	2021	Alga	E4	3	78
Playa Baracoa	2021	Alga	E4	4	94.9
Playa Baracoa	2021	Alga	E4	5	91.4
Playa Baracoa	2021	Alga	E4	6	91
Playa Baracoa	2021	Alga	E4	7	72.9
Playa Baracoa	2021	Alga	E4	8	89
Playa Baracoa	2021	Alga	E4	9	94
Playa Baracoa	2021	Alga	E4	10	86.5
Playa Baracoa	2021	Alga	E5	1	78.3
Playa Baracoa	2021	Alga	E5	2	91
Playa Baracoa	2021	Alga	E5	3	69.2
Playa Baracoa	2021	Alga	E5	4	85.9
Playa Baracoa	2021	Alga	E5	5	83.9
Playa Baracoa	2021	Alga	E5	6	91.8
Playa Baracoa	2021	Alga	E5	7	90.5
Playa Baracoa	2021	Alga	E5	8	86
Playa Baracoa	2021	Alga	E5	9	89.5
Playa Baracoa	2021	Alga	E5	10	89.5
Playa Baracoa	2021	Alga	E6	1	83
Playa Baracoa	2021	Alga	E6	2	92.5
Playa Baracoa	2021	Alga	E6	3	90.3
Playa Baracoa	2021	Alga	E6	4	92.1
Playa Baracoa	2021	Alga	E6	5	98.1
Playa Baracoa	2021	Alga	E6	6	82.9
Playa Baracoa	2021	Alga	E6	7	90.5
Playa Baracoa	2021	Alga	E6	8	79.7
Playa Baracoa	2021	Alga	E6	9	95.5
Playa Baracoa	2021	Alga	E6	10	78.5
Playa Baracoa	2015	Coral	E1	1	6
Playa Baracoa	2015	Coral	E1	2	13
Playa Baracoa	2015	Coral	E1	3	15
Playa Baracoa	2015	Coral	E1	4	17
Playa Baracoa	2015	Coral	E1	5	19
Playa Baracoa	2015	Coral	E1	6	13
Playa Baracoa	2015	Coral	E1	7	24
Playa Baracoa	2015	Coral	E1	8	20
Playa Baracoa	2015	Coral	E1	9	24
Playa Baracoa	2015	Coral	E1	10	7
Playa Baracoa	2015	Coral	E2	1	6
Playa Baracoa	2015	Coral	E2	2	18
Playa Baracoa	2015	Coral	E2	3	15
Playa Baracoa	2015	Coral	E2	4	9
Playa Baracoa	2015	Coral	E2	5	11
Playa Baracoa	2015	Coral	E2	6	8
Playa Baracoa	2015	Coral	E2	7	10
Playa Baracoa	2015	Coral	E2	8	8
Playa Baracoa	2015	Coral	E2	9	19
Playa Baracoa	2015	Coral	E2	10	20
Playa Baracoa	2015	Coral	E3	1	11
Playa Baracoa	2015	Coral	E3	2	24
Playa Baracoa	2015	Coral	E3	3	23
Playa Baracoa	2015	Coral	E3	4	31
Playa Baracoa	2015	Coral	E3	5	24
Playa Baracoa	2015	Coral	E3	6	17
Playa Baracoa	2015	Coral	E3	7	10
Playa Baracoa	2015	Coral	E3	8	6
Playa Baracoa	2015	Coral	E3	9	12
Playa Baracoa	2015	Coral	E3	10	32
Playa Baracoa	2015	Coral	E4	1	24
Playa Baracoa	2015	Coral	E4	2	15
Playa Baracoa	2015	Coral	E4	3	16
Playa Baracoa	2015	Coral	E4	4	24
Playa Baracoa	2015	Coral	E4	5	12
Playa Baracoa	2015	Coral	E4	6	4
Playa Baracoa	2015	Coral	E4	7	10
Playa Baracoa	2015	Coral	E4	8	3
Playa Baracoa	2015	Coral	E4	9	11
Playa Baracoa	2015	Coral	E4	10	7
Playa Baracoa	2015	Coral	E5	1	12
Playa Baracoa	2015	Coral	E5	2	25
Playa Baracoa	2015	Coral	E5	3	20
Playa Baracoa	2015	Coral	E5	4	24
Playa Baracoa	2015	Coral	E5	5	14
Playa Baracoa	2015	Coral	E5	6	6
Playa Baracoa	2015	Coral	E5	7	8
Playa Baracoa	2015	Coral	E5	8	10
Playa Baracoa	2015	Coral	E5	9	10
Playa Baracoa	2015	Coral	E5	10	6
Playa Baracoa	2015	Coral	E6	1	34
Playa Baracoa	2015	Coral	E6	2	21
Playa Baracoa	2015	Coral	E6	3	16
Playa Baracoa	2015	Coral	E6	4	10
Playa Baracoa	2015	Coral	E6	5	19
Playa Baracoa	2015	Coral	E6	6	22
Playa Baracoa	2015	Coral	E6	7	21
Playa Baracoa	2015	Coral	E6	8	6
Playa Baracoa	2015	Coral	E6	9	2
Playa Baracoa	2015	Coral	E6	10	15
Playa Baracoa	2021	Coral	E1	1	5.8
Playa Baracoa	2021	Coral	E1	2	6.5
Playa Baracoa	2021	Coral	E1	3	8.2
Playa Baracoa	2021	Coral	E1	4	4.4
Playa Baracoa	2021	Coral	E1	5	7.3
Playa Baracoa	2021	Coral	E1	6	6.5
Playa Baracoa	2021	Coral	E1	7	10.5
Playa Baracoa	2021	Coral	E1	8	13
Playa Baracoa	2021	Coral	E1	9	9.5
Playa Baracoa	2021	Coral	E1	10	5.5
Playa Baracoa	2021	Coral	E2	1	8.5
Playa Baracoa	2021	Coral	E2	2	8.5
Playa Baracoa	2021	Coral	E2	3	5.8
Playa Baracoa	2021	Coral	E2	4	5.3
Playa Baracoa	2021	Coral	E2	5	9
Playa Baracoa	2021	Coral	E2	6	12.6
Playa Baracoa	2021	Coral	E2	7	6.4
Playa Baracoa	2021	Coral	E2	8	6
Playa Baracoa	2021	Coral	E2	9	3
Playa Baracoa	2021	Coral	E2	10	8
Playa Baracoa	2021	Coral	E3	1	2.5
Playa Baracoa	2021	Coral	E3	2	17.6
Playa Baracoa	2021	Coral	E3	3	8.3
Playa Baracoa	2021	Coral	E3	4	8.3
Playa Baracoa	2021	Coral	E3	5	1
Playa Baracoa	2021	Coral	E3	6	18
Playa Baracoa	2021	Coral	E3	7	2.2
Playa Baracoa	2021	Coral	E3	8	5
Playa Baracoa	2021	Coral	E3	9	4.5
Playa Baracoa	2021	Coral	E3	10	15
Playa Baracoa	2021	Coral	E4	1	3.5
Playa Baracoa	2021	Coral	E4	2	10
Playa Baracoa	2021	Coral	E4	3	9
Playa Baracoa	2021	Coral	E4	4	5.1
Playa Baracoa	2021	Coral	E4	5	8.6
Playa Baracoa	2021	Coral	E4	6	4.7
Playa Baracoa	2021	Coral	E4	7	27.1
Playa Baracoa	2021	Coral	E4	8	4.5
Playa Baracoa	2021	Coral	E4	9	5
Playa Baracoa	2021	Coral	E4	10	12.5
Playa Baracoa	2021	Coral	E5	1	21.7
Playa Baracoa	2021	Coral	E5	2	4
Playa Baracoa	2021	Coral	E5	3	26.3
Playa Baracoa	2021	Coral	E5	4	5.8
Playa Baracoa	2021	Coral	E5	5	16.1
Playa Baracoa	2021	Coral	E5	6	8.2
Playa Baracoa	2021	Coral	E5	7	8.7
Playa Baracoa	2021	Coral	E5	8	14
Playa Baracoa	2021	Coral	E5	9	9.5
Playa Baracoa	2021	Coral	E5	10	8.5
Playa Baracoa	2021	Coral	E6	1	1.5
Playa Baracoa	2021	Coral	E6	2	1.5
Playa Baracoa	2021	Coral	E6	3	7.2
Playa Baracoa	2021	Coral	E6	4	7.9
Playa Baracoa	2021	Coral	E6	5	1.4
Playa Baracoa	2021	Coral	E6	6	9.9
Playa Baracoa	2021	Coral	E6	7	9.5
Playa Baracoa	2021	Coral	E6	8	10.5
Playa Baracoa	2021	Coral	E6	9	4.5
Playa Baracoa	2021	Coral	E6	10	19.5
Rincon de Guanabo	2015	Algae	E1	1	33
Rincon de Guanabo	2015	Algae	E1	2	21
Rincon de Guanabo	2015	Algae	E1	3	36
Rincon de Guanabo	2015	Algae	E1	4	15
Rincon de Guanabo	2015	Algae	E1	5	30
Rincon de Guanabo	2015	Algae	E1	6	7
Rincon de Guanabo	2015	Algae	E1	7	22
Rincon de Guanabo	2015	Algae	E1	8	19
Rincon de Guanabo	2015	Algae	E1	9	28
Rincon de Guanabo	2015	Algae	E1	10	17
Rincon de Guanabo	2015	Algae	E2	1	20
Rincon de Guanabo	2015	Algae	E2	2	14
Rincon de Guanabo	2015	Algae	E2	3	13
Rincon de Guanabo	2015	Algae	E2	4	7
Rincon de Guanabo	2015	Algae	E2	5	16
Rincon de Guanabo	2015	Algae	E2	6	12
Rincon de Guanabo	2015	Algae	E2	7	29
Rincon de Guanabo	2015	Algae	E2	8	23
Rincon de Guanabo	2015	Algae	E2	9	44
Rincon de Guanabo	2015	Algae	E2	10	43
Rincon de Guanabo	2015	Algae	E3	1	21
Rincon de Guanabo	2015	Algae	E3	2	17
Rincon de Guanabo	2015	Algae	E3	3	34
Rincon de Guanabo	2015	Algae	E3	4	38
Rincon de Guanabo	2015	Algae	E3	5	51
Rincon de Guanabo	2015	Algae	E3	6	17
Rincon de Guanabo	2015	Algae	E3	7	24
Rincon de Guanabo	2015	Algae	E3	8	14
Rincon de Guanabo	2015	Algae	E3	9	33
Rincon de Guanabo	2015	Algae	E3	10	29
Rincon de Guanabo	2015	Algae	E4	1	6
Rincon de Guanabo	2015	Algae	E4	2	6
Rincon de Guanabo	2015	Algae	E4	3	4
Rincon de Guanabo	2015	Algae	E4	4	2
Rincon de Guanabo	2015	Algae	E4	5	32
Rincon de Guanabo	2015	Algae	E4	6	19
Rincon de Guanabo	2015	Algae	E4	7	7
Rincon de Guanabo	2015	Algae	E4	8	24
Rincon de Guanabo	2015	Algae	E4	9	29
Rincon de Guanabo	2015	Algae	E4	10	20
Rincon de Guanabo	2015	Algae	E5	1	25
Rincon de Guanabo	2015	Algae	E5	2	40
Rincon de Guanabo	2015	Algae	E5	3	29
Rincon de Guanabo	2015	Algae	E5	4	44
Rincon de Guanabo	2015	Algae	E5	5	29
Rincon de Guanabo	2015	Algae	E5	6	0
Rincon de Guanabo	2015	Algae	E5	7	8
Rincon de Guanabo	2015	Algae	E5	8	23
Rincon de Guanabo	2015	Algae	E5	9	10
Rincon de Guanabo	2015	Algae	E5	10	23
Rincon de Guanabo	2015	Algae	E6	1	45
Rincon de Guanabo	2015	Algae	E6	2	53
Rincon de Guanabo	2015	Algae	E6	3	40
Rincon de Guanabo	2015	Algae	E6	4	30
Rincon de Guanabo	2015	Algae	E6	5	5
Rincon de Guanabo	2015	Algae	E6	6	13
Rincon de Guanabo	2015	Algae	E6	7	7
Rincon de Guanabo	2015	Algae	E6	8	18
Rincon de Guanabo	2015	Algae	E6	9	14
Rincon de Guanabo	2015	Algae	E6	10	5
Rincon de Guanabo	2021	Algae	E1	1	70.5
Rincon de Guanabo	2021	Algae	E1	2	78.4
Rincon de Guanabo	2021	Algae	E1	3	63.2
Rincon de Guanabo	2021	Algae	E1	4	64.7
Rincon de Guanabo	2021	Algae	E1	5	89
Rincon de Guanabo	2021	Algae	E1	6	97.6
Rincon de Guanabo	2021	Algae	E1	7	87.2
Rincon de Guanabo	2021	Algae	E1	8	85.5
Rincon de Guanabo	2021	Algae	E1	9	81.5
Rincon de Guanabo	2021	Algae	E1	10	93.7
Rincon de Guanabo	2021	Algae	E2	1	58.5
Rincon de Guanabo	2021	Algae	E2	2	87
Rincon de Guanabo	2021	Algae	E2	3	87
Rincon de Guanabo	2021	Algae	E2	4	91.9
Rincon de Guanabo	2021	Algae	E2	5	84.5
Rincon de Guanabo	2021	Algae	E2	6	96
Rincon de Guanabo	2021	Algae	E2	7	89.3
Rincon de Guanabo	2021	Algae	E2	8	92.5
Rincon de Guanabo	2021	Algae	E2	9	89.5
Rincon de Guanabo	2021	Algae	E2	10	60
Rincon de Guanabo	2021	Algae	E3	1	70
Rincon de Guanabo	2021	Algae	E3	2	84.1
Rincon de Guanabo	2021	Algae	E3	3	94.5
Rincon de Guanabo	2021	Algae	E3	4	34.5
Rincon de Guanabo	2021	Algae	E3	5	27
Rincon de Guanabo	2021	Algae	E3	6	77
Rincon de Guanabo	2021	Algae	E3	7	82
Rincon de Guanabo	2021	Algae	E3	8	57.5
Rincon de Guanabo	2021	Algae	E3	9	51.5
Rincon de Guanabo	2021	Algae	E3	10	38
Rincon de Guanabo	2021	Algae	E4	1	48.7
Rincon de Guanabo	2021	Algae	E4	2	88
Rincon de Guanabo	2021	Algae	E4	3	71.5
Rincon de Guanabo	2021	Algae	E4	4	72.6
Rincon de Guanabo	2021	Algae	E4	5	47.8
Rincon de Guanabo	2021	Algae	E4	6	78.6
Rincon de Guanabo	2021	Algae	E4	7	90
Rincon de Guanabo	2021	Algae	E4	8	76
Rincon de Guanabo	2021	Algae	E4	9	89
Rincon de Guanabo	2021	Algae	E4	10	64.5
Rincon de Guanabo	2021	Algae	E5	1	81.5
Rincon de Guanabo	2021	Algae	E5	2	85.2
Rincon de Guanabo	2021	Algae	E5	3	75.4
Rincon de Guanabo	2021	Algae	E5	4	76.1
Rincon de Guanabo	2021	Algae	E5	5	79.3
Rincon de Guanabo	2021	Algae	E5	6	90.3
Rincon de Guanabo	2021	Algae	E5	7	49.6
Rincon de Guanabo	2021	Algae	E5	8	73.5
Rincon de Guanabo	2021	Algae	E5	9	98
Rincon de Guanabo	2021	Algae	E5	10	75
Rincon de Guanabo	2021	Algae	E6	1	86.5
Rincon de Guanabo	2021	Algae	E6	2	87.5
Rincon de Guanabo	2021	Algae	E6	3	74.2
Rincon de Guanabo	2021	Algae	E6	4	79.9
Rincon de Guanabo	2021	Algae	E6	5	91.9
Rincon de Guanabo	2021	Algae	E6	6	83.1
Rincon de Guanabo	2021	Algae	E6	7	84.4
Rincon de Guanabo	2021	Algae	E6	8	89.5
Rincon de Guanabo	2021	Algae	E6	9	89
Rincon de Guanabo	2021	Algae	E6	10	89.5
Rincon de Guanabo	2015	Coral	E1	1	8
Rincon de Guanabo	2015	Coral	E1	2	17
Rincon de Guanabo	2015	Coral	E1	3	18
Rincon de Guanabo	2015	Coral	E1	4	41
Rincon de Guanabo	2015	Coral	E1	5	32
Rincon de Guanabo	2015	Coral	E1	6	43
Rincon de Guanabo	2015	Coral	E1	7	30
Rincon de Guanabo	2015	Coral	E1	8	17
Rincon de Guanabo	2015	Coral	E1	9	12
Rincon de Guanabo	2015	Coral	E1	10	49
Rincon de Guanabo	2015	Coral	E2	1	13
Rincon de Guanabo	2015	Coral	E2	2	15
Rincon de Guanabo	2015	Coral	E2	3	27
Rincon de Guanabo	2015	Coral	E2	4	28
Rincon de Guanabo	2015	Coral	E2	5	36
Rincon de Guanabo	2015	Coral	E2	6	20
Rincon de Guanabo	2015	Coral	E2	7	11
Rincon de Guanabo	2015	Coral	E2	8	25
Rincon de Guanabo	2015	Coral	E2	9	30
Rincon de Guanabo	2015	Coral	E2	10	19
Rincon de Guanabo	2015	Coral	E3	1	4
Rincon de Guanabo	2015	Coral	E3	2	35
Rincon de Guanabo	2015	Coral	E3	3	25
Rincon de Guanabo	2015	Coral	E3	4	19
Rincon de Guanabo	2015	Coral	E3	5	24
Rincon de Guanabo	2015	Coral	E3	6	5
Rincon de Guanabo	2015	Coral	E3	7	9
Rincon de Guanabo	2015	Coral	E3	8	22
Rincon de Guanabo	2015	Coral	E3	9	20
Rincon de Guanabo	2015	Coral	E3	10	19
Rincon de Guanabo	2015	Coral	E4	1	31
Rincon de Guanabo	2015	Coral	E4	2	36
Rincon de Guanabo	2015	Coral	E4	3	27
Rincon de Guanabo	2015	Coral	E4	4	18
Rincon de Guanabo	2015	Coral	E4	5	45
Rincon de Guanabo	2015	Coral	E4	6	45
Rincon de Guanabo	2015	Coral	E4	7	47
Rincon de Guanabo	2015	Coral	E4	8	23
Rincon de Guanabo	2015	Coral	E4	9	32
Rincon de Guanabo	2015	Coral	E4	10	29
Rincon de Guanabo	2015	Coral	E5	1	57
Rincon de Guanabo	2015	Coral	E5	2	29
Rincon de Guanabo	2015	Coral	E5	3	21
Rincon de Guanabo	2015	Coral	E5	4	12
Rincon de Guanabo	2015	Coral	E5	5	29
Rincon de Guanabo	2015	Coral	E5	6	34
Rincon de Guanabo	2015	Coral	E5	7	25
Rincon de Guanabo	2015	Coral	E5	8	32
Rincon de Guanabo	2015	Coral	E5	9	36
Rincon de Guanabo	2015	Coral	E5	10	15
Rincon de Guanabo	2015	Coral	E6	1	39
Rincon de Guanabo	2015	Coral	E6	2	27
Rincon de Guanabo	2015	Coral	E6	3	40
Rincon de Guanabo	2015	Coral	E6	4	28
Rincon de Guanabo	2015	Coral	E6	5	40
Rincon de Guanabo	2015	Coral	E6	6	42
Rincon de Guanabo	2015	Coral	E6	7	44
Rincon de Guanabo	2015	Coral	E6	8	34
Rincon de Guanabo	2015	Coral	E6	9	27
Rincon de Guanabo	2015	Coral	E6	10	31
Rincon de Guanabo	2021	Coral	E1	1	27.5
Rincon de Guanabo	2021	Coral	E1	2	21.6
Rincon de Guanabo	2021	Coral	E1	3	36.8
Rincon de Guanabo	2021	Coral	E1	4	35.3
Rincon de Guanabo	2021	Coral	E1	5	11
Rincon de Guanabo	2021	Coral	E1	6	2.4
Rincon de Guanabo	2021	Coral	E1	7	12.8
Rincon de Guanabo	2021	Coral	E1	8	10
Rincon de Guanabo	2021	Coral	E1	9	15.5
Rincon de Guanabo	2021	Coral	E1	10	5.8
Rincon de Guanabo	2021	Coral	E2	1	41
Rincon de Guanabo	2021	Coral	E2	2	5
Rincon de Guanabo	2021	Coral	E2	3	13
Rincon de Guanabo	2021	Coral	E2	4	7.6
Rincon de Guanabo	2021	Coral	E2	5	15.5
Rincon de Guanabo	2021	Coral	E2	6	4
Rincon de Guanabo	2021	Coral	E2	7	10.7
Rincon de Guanabo	2021	Coral	E2	8	3.5
Rincon de Guanabo	2021	Coral	E2	9	10
Rincon de Guanabo	2021	Coral	E2	10	39.5
Rincon de Guanabo	2021	Coral	E3	1	29.5
Rincon de Guanabo	2021	Coral	E3	2	15.9
Rincon de Guanabo	2021	Coral	E3	3	5.5
Rincon de Guanabo	2021	Coral	E3	4	13.5
Rincon de Guanabo	2021	Coral	E3	5	9
Rincon de Guanabo	2021	Coral	E3	6	12.5
Rincon de Guanabo	2021	Coral	E3	7	13.5
Rincon de Guanabo	2021	Coral	E3	8	25.5
Rincon de Guanabo	2021	Coral	E3	9	15
Rincon de Guanabo	2021	Coral	E3	10	18
Rincon de Guanabo	2021	Coral	E4	1	51.3
Rincon de Guanabo	2021	Coral	E4	2	6
Rincon de Guanabo	2021	Coral	E4	3	23.5
Rincon de Guanabo	2021	Coral	E4	4	24.7
Rincon de Guanabo	2021	Coral	E4	5	45.2
Rincon de Guanabo	2021	Coral	E4	6	21.4
Rincon de Guanabo	2021	Coral	E4	7	10
Rincon de Guanabo	2021	Coral	E4	8	19.5
Rincon de Guanabo	2021	Coral	E4	9	10.5
Rincon de Guanabo	2021	Coral	E4	10	35.5
Rincon de Guanabo	2021	Coral	E5	1	17.5
Rincon de Guanabo	2021	Coral	E5	2	13.3
Rincon de Guanabo	2021	Coral	E5	3	20.6
Rincon de Guanabo	2021	Coral	E5	4	18.1
Rincon de Guanabo	2021	Coral	E5	5	4.1
Rincon de Guanabo	2021	Coral	E5	6	9.7
Rincon de Guanabo	2021	Coral	E5	7	10.4
Rincon de Guanabo	2021	Coral	E5	8	26.5
Rincon de Guanabo	2021	Coral	E5	9	1.5
Rincon de Guanabo	2021	Coral	E5	10	20
Rincon de Guanabo	2021	Coral	E6	1	10.5
Rincon de Guanabo	2021	Coral	E6	2	10
Rincon de Guanabo	2021	Coral	E6	3	24.3
Rincon de Guanabo	2021	Coral	E6	4	20.1
Rincon de Guanabo	2021	Coral	E6	5	5.3
Rincon de Guanabo	2021	Coral	E6	6	16.9
Rincon de Guanabo	2021	Coral	E6	7	15.6
Rincon de Guanabo	2021	Coral	E6	8	10
Rincon de Guanabo	2021	Coral	E6	9	6
Rincon de Guanabo	2021	Coral	E6	10	10.5

## Sheet: morphofuncional groups of algae
Reef	Station	Transect	Category	Abundance
Baracoa	1	1	Turf	8
Baracoa	1	2	Turf	9
Baracoa	1	3	Turf	6
Baracoa	1	4	Turf	9
Baracoa	1	5	Turf	3
Baracoa	1	6	Turf	3
Baracoa	1	7	Turf	4
Baracoa	1	8	Turf	11
Baracoa	1	9	Turf	7
Baracoa	1	10	Turf	1
Baracoa	1	1	TAS	12
Baracoa	1	2	TAS	13
Baracoa	1	3	TAS	22
Baracoa	1	4	TAS	13
Baracoa	1	5	TAS	17
Baracoa	1	6	TAS	1
Baracoa	1	7	TAS	12
Baracoa	1	8	TAS	4
Baracoa	1	9	TAS	2
Baracoa	1	10	TAS	10
Baracoa	1	1	fleshy macroalgae	37
Baracoa	1	2	fleshy macroalgae	43
Baracoa	1	3	fleshy macroalgae	32
Baracoa	1	4	fleshy macroalgae	32
Baracoa	1	5	fleshy macroalgae	34
Baracoa	1	6	fleshy macroalgae	29
Baracoa	1	7	fleshy macroalgae	36
Baracoa	1	8	fleshy macroalgae	35
Baracoa	1	9	fleshy macroalgae	29
Baracoa	1	10	fleshy macroalgae	39
Baracoa	1	1	filamentous algae	8
Baracoa	1	2	filamentous algae	9
Baracoa	1	3	filamentous algae	11
Baracoa	1	4	filamentous algae	12
Baracoa	1	5	filamentous algae	13
Baracoa	1	6	filamentous algae	7
Baracoa	1	7	filamentous algae	4
Baracoa	1	8	filamentous algae	16
Baracoa	1	9	filamentous algae	1
Baracoa	1	10	filamentous algae	6
Baracoa	1	1	articulated calcareous algae	5
Baracoa	1	2	articulated calcareous algae	5
Baracoa	1	3	articulated calcareous algae	8
Baracoa	1	4	articulated calcareous algae	6
Baracoa	1	5	articulated calcareous algae	9
Baracoa	1	6	articulated calcareous algae	15
Baracoa	1	7	articulated calcareous algae	7
Baracoa	1	8	articulated calcareous algae	3
Baracoa	1	9	articulated calcareous algae	7
Baracoa	1	10	articulated calcareous algae	13
Baracoa	1	1	Dictyota	3
Baracoa	1	2	Dictyota	0
Baracoa	1	3	Dictyota	1
Baracoa	1	4	Dictyota	1
Baracoa	1	5	Dictyota	0
Baracoa	1	6	Dictyota	1
Baracoa	1	7	Dictyota	0
Baracoa	1	8	Dictyota	0
Baracoa	1	9	Dictyota	0
Baracoa	1	10	Dictyota	0
Baracoa	1	1	encrusting red algae	14
Baracoa	1	2	encrusting red algae	6
Baracoa	1	3	encrusting red algae	1
Baracoa	1	4	encrusting red algae	8
Baracoa	1	5	encrusting red algae	6
Baracoa	1	6	encrusting red algae	11
Baracoa	1	7	encrusting red algae	9
Baracoa	1	8	encrusting red algae	8
Baracoa	1	9	encrusting red algae	8
Baracoa	1	10	encrusting red algae	2
Baracoa	2	1	Turf	13
Baracoa	2	2	Turf	16
Baracoa	2	3	Turf	3
Baracoa	2	4	Turf	10
Baracoa	2	5	Turf	26
Baracoa	2	6	Turf	10
Baracoa	2	7	Turf	10
Baracoa	2	8	Turf	8
Baracoa	2	9	Turf	22
Baracoa	2	10	Turf	23
Baracoa	2	1	TAS	9
Baracoa	2	2	TAS	11
Baracoa	2	3	TAS	18
Baracoa	2	4	TAS	9
Baracoa	2	5	TAS	9
Baracoa	2	6	TAS	12
Baracoa	2	7	TAS	10
Baracoa	2	8	TAS	41
Baracoa	2	9	TAS	19
Baracoa	2	10	TAS	0
Baracoa	2	1	fleshy macroalgae	6
Baracoa	2	2	fleshy macroalgae	14
Baracoa	2	3	fleshy macroalgae	26
Baracoa	2	4	fleshy macroalgae	12
Baracoa	2	5	fleshy macroalgae	2
Baracoa	2	6	fleshy macroalgae	19
Baracoa	2	7	fleshy macroalgae	14
Baracoa	2	8	fleshy macroalgae	2
Baracoa	2	9	fleshy macroalgae	11
Baracoa	2	10	fleshy macroalgae	7
Baracoa	2	1	filamentous algae	1
Baracoa	2	2	filamentous algae	7
Baracoa	2	3	filamentous algae	7
Baracoa	2	4	filamentous algae	1
Baracoa	2	5	filamentous algae	0
Baracoa	2	6	filamentous algae	4
Baracoa	2	7	filamentous algae	4
Baracoa	2	8	filamentous algae	0
Baracoa	2	9	filamentous algae	1
Baracoa	2	10	filamentous algae	0
Baracoa	2	1	articulated calcareous algae	10
Baracoa	2	2	articulated calcareous algae	16
Baracoa	2	3	articulated calcareous algae	7
Baracoa	2	4	articulated calcareous algae	11
Baracoa	2	5	articulated calcareous algae	15
Baracoa	2	6	articulated calcareous algae	10
Baracoa	2	7	articulated calcareous algae	12
Baracoa	2	8	articulated calcareous algae	19
Baracoa	2	9	articulated calcareous algae	14
Baracoa	2	10	articulated calcareous algae	4
Baracoa	2	1	Dictyota	1
Baracoa	2	2	Dictyota	9
Baracoa	2	3	Dictyota	17
Baracoa	2	4	Dictyota	13
Baracoa	2	5	Dictyota	4
Baracoa	2	6	Dictyota	7
Baracoa	2	7	Dictyota	23
Baracoa	2	8	Dictyota	3
Baracoa	2	9	Dictyota	8
Baracoa	2	10	Dictyota	4
Baracoa	2	1	encrusting red algae	20
Baracoa	2	2	encrusting red algae	5
Baracoa	2	3	encrusting red algae	1
Baracoa	2	4	encrusting red algae	20
Baracoa	2	5	encrusting red algae	14
Baracoa	2	6	encrusting red algae	19
Baracoa	2	7	encrusting red algae	7
Baracoa	2	8	encrusting red algae	7
Baracoa	2	9	encrusting red algae	12
Baracoa	2	10	encrusting red algae	23
Baracoa	3	1	Turf	16
Baracoa	3	2	Turf	12
Baracoa	3	3	Turf	9
Baracoa	3	4	Turf	37
Baracoa	3	5	Turf	31
Baracoa	3	6	Turf	7
Baracoa	3	7	Turf	40
Baracoa	3	8	Turf	26
Baracoa	3	9	Turf	26
Baracoa	3	10	Turf	8
Baracoa	3	1	TAS	7
Baracoa	3	2	TAS	7
Baracoa	3	3	TAS	1
Baracoa	3	4	TAS	3
Baracoa	3	5	TAS	6
Baracoa	3	6	TAS	35
Baracoa	3	7	TAS	0
Baracoa	3	8	TAS	7
Baracoa	3	9	TAS	0
Baracoa	3	10	TAS	41
Baracoa	3	1	fleshy macroalgae	8
Baracoa	3	2	fleshy macroalgae	6
Baracoa	3	3	fleshy macroalgae	11
Baracoa	3	4	fleshy macroalgae	8
Baracoa	3	5	fleshy macroalgae	12
Baracoa	3	6	fleshy macroalgae	4
Baracoa	3	7	fleshy macroalgae	4
Baracoa	3	8	fleshy macroalgae	1
Baracoa	3	9	fleshy macroalgae	4
Baracoa	3	10	fleshy macroalgae	8
Baracoa	3	1	filamentous algae	4
Baracoa	3	2	filamentous algae	1
Baracoa	3	3	filamentous algae	0
Baracoa	3	4	filamentous algae	3
Baracoa	3	5	filamentous algae	0
Baracoa	3	6	filamentous algae	1
Baracoa	3	7	filamentous algae	0
Baracoa	3	8	filamentous algae	0
Baracoa	3	9	filamentous algae	0
Baracoa	3	10	filamentous algae	0
Baracoa	3	1	articulated calcareous algae	7
Baracoa	3	2	articulated calcareous algae	7
Baracoa	3	3	articulated calcareous algae	5
Baracoa	3	4	articulated calcareous algae	12
Baracoa	3	5	articulated calcareous algae	19
Baracoa	3	6	articulated calcareous algae	15
Baracoa	3	7	articulated calcareous algae	4
Baracoa	3	8	articulated calcareous algae	25
Baracoa	3	9	articulated calcareous algae	5
Baracoa	3	10	articulated calcareous algae	17
Baracoa	3	1	Dictyota	14
Baracoa	3	2	Dictyota	12
Baracoa	3	3	Dictyota	10
Baracoa	3	4	Dictyota	1
Baracoa	3	5	Dictyota	11
Baracoa	3	6	Dictyota	10
Baracoa	3	7	Dictyota	5
Baracoa	3	8	Dictyota	2
Baracoa	3	9	Dictyota	4
Baracoa	3	10	Dictyota	8
Baracoa	3	1	encrusting red algae	24
Baracoa	3	2	encrusting red algae	20
Baracoa	3	3	encrusting red algae	34
Baracoa	3	4	encrusting red algae	25
Baracoa	3	5	encrusting red algae	10
Baracoa	3	6	encrusting red algae	4
Baracoa	3	7	encrusting red algae	25
Baracoa	3	8	encrusting red algae	17
Baracoa	3	9	encrusting red algae	32
Baracoa	3	10	encrusting red algae	0
Baracoa	4	1	Turf	13
Baracoa	4	2	Turf	15
Baracoa	4	3	Turf	22
Baracoa	4	4	Turf	3
Baracoa	4	5	Turf	15
Baracoa	4	6	Turf	30
Baracoa	4	7	Turf	30
Baracoa	4	8	Turf	25
Baracoa	4	9	Turf	7
Baracoa	4	10	Turf	8
Baracoa	4	1	TAS	2
Baracoa	4	2	TAS	13
Baracoa	4	3	TAS	11
Baracoa	4	4	TAS	19
Baracoa	4	5	TAS	13
Baracoa	4	6	TAS	3
Baracoa	4	7	TAS	2
Baracoa	4	8	TAS	3
Baracoa	4	9	TAS	33
Baracoa	4	10	TAS	28
Baracoa	4	1	fleshy macroalgae	11
Baracoa	4	2	fleshy macroalgae	16
Baracoa	4	3	fleshy macroalgae	15
Baracoa	4	4	fleshy macroalgae	11
Baracoa	4	5	fleshy macroalgae	4
Baracoa	4	6	fleshy macroalgae	11
Baracoa	4	7	fleshy macroalgae	4
Baracoa	4	8	fleshy macroalgae	5
Baracoa	4	9	fleshy macroalgae	14
Baracoa	4	10	fleshy macroalgae	5
Baracoa	4	1	filamentous algae	2
Baracoa	4	2	filamentous algae	1
Baracoa	4	3	filamentous algae	3
Baracoa	4	4	filamentous algae	0
Baracoa	4	5	filamentous algae	1
Baracoa	4	6	filamentous algae	0
Baracoa	4	7	filamentous algae	0
Baracoa	4	8	filamentous algae	0
Baracoa	4	9	filamentous algae	0
Baracoa	4	10	filamentous algae	0
Baracoa	4	1	articulated calcareous algae	13
Baracoa	4	2	articulated calcareous algae	16
Baracoa	4	3	articulated calcareous algae	7
Baracoa	4	4	articulated calcareous algae	10
Baracoa	4	5	articulated calcareous algae	12
Baracoa	4	6	articulated calcareous algae	6
Baracoa	4	7	articulated calcareous algae	12
Baracoa	4	8	articulated calcareous algae	16
Baracoa	4	9	articulated calcareous algae	13
Baracoa	4	10	articulated calcareous algae	3
Baracoa	4	1	Dictyota	11
Baracoa	4	2	Dictyota	7
Baracoa	4	3	Dictyota	25
Baracoa	4	4	Dictyota	19
Baracoa	4	5	Dictyota	9
Baracoa	4	6	Dictyota	13
Baracoa	4	7	Dictyota	12
Baracoa	4	8	Dictyota	8
Baracoa	4	9	Dictyota	8
Baracoa	4	10	Dictyota	11
Baracoa	4	1	encrusting red algae	25
Baracoa	4	2	encrusting red algae	8
Baracoa	4	3	encrusting red algae	7
Baracoa	4	4	encrusting red algae	18
Baracoa	4	5	encrusting red algae	29
Baracoa	4	6	encrusting red algae	22
Baracoa	4	7	encrusting red algae	28
Baracoa	4	8	encrusting red algae	22
Baracoa	4	9	encrusting red algae	12
Baracoa	4	10	encrusting red algae	33
Baracoa	5	1	Turf	19
Baracoa	5	2	Turf	4
Baracoa	5	3	Turf	4
Baracoa	5	4	Turf	28
Baracoa	5	5	Turf	5
Baracoa	5	6	Turf	5
Baracoa	5	7	Turf	2
Baracoa	5	8	Turf	26
Baracoa	5	9	Turf	4
Baracoa	5	10	Turf	0
Baracoa	5	1	TAS	2
Baracoa	5	2	TAS	32
Baracoa	5	3	TAS	32
Baracoa	5	4	TAS	0
Baracoa	5	5	TAS	22
Baracoa	5	6	TAS	43
Baracoa	5	7	TAS	42
Baracoa	5	8	TAS	6
Baracoa	5	9	TAS	30
Baracoa	5	10	TAS	74
Baracoa	5	1	fleshy macroalgae	8
Baracoa	5	2	fleshy macroalgae	34
Baracoa	5	3	fleshy macroalgae	34
Baracoa	5	4	fleshy macroalgae	10
Baracoa	5	5	fleshy macroalgae	33
Baracoa	5	6	fleshy macroalgae	19
Baracoa	5	7	fleshy macroalgae	32
Baracoa	5	8	fleshy macroalgae	7
Baracoa	5	9	fleshy macroalgae	25
Baracoa	5	10	fleshy macroalgae	21
Baracoa	5	1	filamentous algae	0
Baracoa	5	2	filamentous algae	0
Baracoa	5	3	filamentous algae	1
Baracoa	5	4	filamentous algae	0
Baracoa	5	5	filamentous algae	5
Baracoa	5	6	filamentous algae	5
Baracoa	5	7	filamentous algae	0
Baracoa	5	8	filamentous algae	0
Baracoa	5	9	filamentous algae	12
Baracoa	5	10	filamentous algae	0
Baracoa	5	1	articulated calcareous algae	1
Baracoa	5	2	articulated calcareous algae	7
Baracoa	5	3	articulated calcareous algae	6
Baracoa	5	4	articulated calcareous algae	3
Baracoa	5	5	articulated calcareous algae	12
Baracoa	5	6	articulated calcareous algae	3
Baracoa	5	7	articulated calcareous algae	5
Baracoa	5	8	articulated calcareous algae	4
Baracoa	5	9	articulated calcareous algae	7
Baracoa	5	10	articulated calcareous algae	0
Baracoa	5	1	Dictyota	8
Baracoa	5	2	Dictyota	5
Baracoa	5	3	Dictyota	12
Baracoa	5	4	Dictyota	8
Baracoa	5	5	Dictyota	10
Baracoa	5	6	Dictyota	10
Baracoa	5	7	Dictyota	5
Baracoa	5	8	Dictyota	11
Baracoa	5	9	Dictyota	13
Baracoa	5	10	Dictyota	4
Baracoa	5	1	encrusting red algae	28
Baracoa	5	2	encrusting red algae	9
Baracoa	5	3	encrusting red algae	5
Baracoa	5	4	encrusting red algae	39
Baracoa	5	5	encrusting red algae	4
Baracoa	5	6	encrusting red algae	1
Baracoa	5	7	encrusting red algae	2
Baracoa	5	8	encrusting red algae	25
Baracoa	5	9	encrusting red algae	0
Baracoa	5	10	encrusting red algae	0
Baracoa	6	1	Turf	38
Baracoa	6	2	Turf	21
Baracoa	6	3	Turf	49
Baracoa	6	4	Turf	5
Baracoa	6	5	Turf	10
Baracoa	6	6	Turf	15
Baracoa	6	7	Turf	10
Baracoa	6	8	Turf	1
Baracoa	6	9	Turf	0
Baracoa	6	10	Turf	10
Baracoa	6	1	TAS	0
Baracoa	6	2	TAS	23
Baracoa	6	3	TAS	0
Baracoa	6	4	TAS	39
Baracoa	6	5	TAS	11
Baracoa	6	6	TAS	32
Baracoa	6	7	TAS	29
Baracoa	6	8	TAS	31
Baracoa	6	9	TAS	30
Baracoa	6	10	TAS	23
Baracoa	6	1	fleshy macroalgae	18
Baracoa	6	2	fleshy macroalgae	24
Baracoa	6	3	fleshy macroalgae	12
Baracoa	6	4	fleshy macroalgae	23
Baracoa	6	5	fleshy macroalgae	31
Baracoa	6	6	fleshy macroalgae	18
Baracoa	6	7	fleshy macroalgae	49
Baracoa	6	8	fleshy macroalgae	44
Baracoa	6	9	fleshy macroalgae	54
Baracoa	6	10	fleshy macroalgae	49
Baracoa	6	1	filamentous algae	0
Baracoa	6	2	filamentous algae	0
Baracoa	6	3	filamentous algae	0
Baracoa	6	4	filamentous algae	0
Baracoa	6	5	filamentous algae	0
Baracoa	6	6	filamentous algae	0
Baracoa	6	7	filamentous algae	0
Baracoa	6	8	filamentous algae	0
Baracoa	6	9	filamentous algae	0
Baracoa	6	10	filamentous algae	0
Baracoa	6	1	articulated calcareous algae	1
Baracoa	6	2	articulated calcareous algae	4
Baracoa	6	3	articulated calcareous algae	1
Baracoa	6	4	articulated calcareous algae	7
Baracoa	6	5	articulated calcareous algae	3
Baracoa	6	6	articulated calcareous algae	9
Baracoa	6	7	articulated calcareous algae	2
Baracoa	6	8	articulated calcareous algae	1
Baracoa	6	9	articulated calcareous algae	1
Baracoa	6	10	articulated calcareous algae	0
Baracoa	6	1	Dictyota	7
Baracoa	6	2	Dictyota	4
Baracoa	6	3	Dictyota	1
Baracoa	6	4	Dictyota	4
Baracoa	6	5	Dictyota	1
Baracoa	6	6	Dictyota	1
Baracoa	6	7	Dictyota	1
Baracoa	6	8	Dictyota	4
Baracoa	6	9	Dictyota	1
Baracoa	6	10	Dictyota	3
Baracoa	6	1	encrusting red algae	12
Baracoa	6	2	encrusting red algae	5
Baracoa	6	3	encrusting red algae	23
Baracoa	6	4	encrusting red algae	5
Baracoa	6	5	encrusting red algae	31
Baracoa	6	6	encrusting red algae	19
Baracoa	6	7	encrusting red algae	2
Baracoa	6	8	encrusting red algae	1
Baracoa	6	9	encrusting red algae	1
Baracoa	6	10	encrusting red algae	0
Rincon de Guanabo	1	1	Turf	14
Rincon de Guanabo	1	2	Turf	3
Rincon de Guanabo	1	3	Turf	4
Rincon de Guanabo	1	4	Turf	8
Rincon de Guanabo	1	5	Turf	14
Rincon de Guanabo	1	6	Turf	18
Rincon de Guanabo	1	7	Turf	8
Rincon de Guanabo	1	8	Turf	16
Rincon de Guanabo	1	9	Turf	3
Rincon de Guanabo	1	10	Turf	11
Rincon de Guanabo	1	1	TAS	0
Rincon de Guanabo	1	2	TAS	8
Rincon de Guanabo	1	3	TAS	0
Rincon de Guanabo	1	4	TAS	2
Rincon de Guanabo	1	5	TAS	7
Rincon de Guanabo	1	6	TAS	4
Rincon de Guanabo	1	7	TAS	3
Rincon de Guanabo	1	8	TAS	5
Rincon de Guanabo	1	9	TAS	33
Rincon de Guanabo	1	10	TAS	0
Rincon de Guanabo	1	1	fleshy macroalgae	37
Rincon de Guanabo	1	2	fleshy macroalgae	39
Rincon de Guanabo	1	3	fleshy macroalgae	27
Rincon de Guanabo	1	4	fleshy macroalgae	19
Rincon de Guanabo	1	5	fleshy macroalgae	33
Rincon de Guanabo	1	6	fleshy macroalgae	21
Rincon de Guanabo	1	7	fleshy macroalgae	28
Rincon de Guanabo	1	8	fleshy macroalgae	49
Rincon de Guanabo	1	9	fleshy macroalgae	40
Rincon de Guanabo	1	10	fleshy macroalgae	33
Rincon de Guanabo	1	1	Dictyota	15
Rincon de Guanabo	1	2	Dictyota	23
Rincon de Guanabo	1	3	Dictyota	20
Rincon de Guanabo	1	4	Dictyota	16
Rincon de Guanabo	1	5	Dictyota	18
Rincon de Guanabo	1	6	Dictyota	13
Rincon de Guanabo	1	7	Dictyota	15
Rincon de Guanabo	1	8	Dictyota	28
Rincon de Guanabo	1	9	Dictyota	17
Rincon de Guanabo	1	10	Dictyota	20
Rincon de Guanabo	1	1	encrusting red algae	40
Rincon de Guanabo	1	2	encrusting red algae	20
Rincon de Guanabo	1	3	encrusting red algae	38
Rincon de Guanabo	1	4	encrusting red algae	52
Rincon de Guanabo	1	5	encrusting red algae	23
Rincon de Guanabo	1	6	encrusting red algae	41
Rincon de Guanabo	1	7	encrusting red algae	33
Rincon de Guanabo	1	8	encrusting red algae	18
Rincon de Guanabo	1	9	encrusting red algae	20
Rincon de Guanabo	1	10	encrusting red algae	33
Rincon de Guanabo	1	1	filamentous algae	4
Rincon de Guanabo	1	2	filamentous algae	0
Rincon de Guanabo	1	3	filamentous algae	1
Rincon de Guanabo	1	4	filamentous algae	1
Rincon de Guanabo	1	5	filamentous algae	4
Rincon de Guanabo	1	6	filamentous algae	1
Rincon de Guanabo	1	7	filamentous algae	3
Rincon de Guanabo	1	8	filamentous algae	1
Rincon de Guanabo	1	9	filamentous algae	12
Rincon de Guanabo	1	10	filamentous algae	6
Rincon de Guanabo	1	1	articulated calcareous algae	17
Rincon de Guanabo	1	2	articulated calcareous algae	3
Rincon de Guanabo	1	3	articulated calcareous algae	3
Rincon de Guanabo	1	4	articulated calcareous algae	2
Rincon de Guanabo	1	5	articulated calcareous algae	4
Rincon de Guanabo	1	6	articulated calcareous algae	6
Rincon de Guanabo	1	7	articulated calcareous algae	5
Rincon de Guanabo	1	8	articulated calcareous algae	15
Rincon de Guanabo	1	9	articulated calcareous algae	6
Rincon de Guanabo	1	10	articulated calcareous algae	6
Rincon de Guanabo	2	1	Turf	5
Rincon de Guanabo	2	2	Turf	10
Rincon de Guanabo	2	3	Turf	4
Rincon de Guanabo	2	4	Turf	5
Rincon de Guanabo	2	5	Turf	13
Rincon de Guanabo	2	6	Turf	7
Rincon de Guanabo	2	7	Turf	14
Rincon de Guanabo	2	8	Turf	9
Rincon de Guanabo	2	9	Turf	24
Rincon de Guanabo	2	10	Turf	5
Rincon de Guanabo	2	1	TAS	0
Rincon de Guanabo	2	2	TAS	13
Rincon de Guanabo	2	3	TAS	0
Rincon de Guanabo	2	4	TAS	0
Rincon de Guanabo	2	5	TAS	0
Rincon de Guanabo	2	6	TAS	0
Rincon de Guanabo	2	7	TAS	5
Rincon de Guanabo	2	8	TAS	6
Rincon de Guanabo	2	9	TAS	0
Rincon de Guanabo	2	10	TAS	0
Rincon de Guanabo	2	1	fleshy macroalgae	13
Rincon de Guanabo	2	2	fleshy macroalgae	41
Rincon de Guanabo	2	3	fleshy macroalgae	29
Rincon de Guanabo	2	4	fleshy macroalgae	10
Rincon de Guanabo	2	5	fleshy macroalgae	34
Rincon de Guanabo	2	6	fleshy macroalgae	22
Rincon de Guanabo	2	7	fleshy macroalgae	40
Rincon de Guanabo	2	8	fleshy macroalgae	15
Rincon de Guanabo	2	9	fleshy macroalgae	30
Rincon de Guanabo	2	10	fleshy macroalgae	36
Rincon de Guanabo	2	1	Dictyota	13
Rincon de Guanabo	2	2	Dictyota	28
Rincon de Guanabo	2	3	Dictyota	23
Rincon de Guanabo	2	4	Dictyota	9
Rincon de Guanabo	2	5	Dictyota	23
Rincon de Guanabo	2	6	Dictyota	14
Rincon de Guanabo	2	7	Dictyota	28
Rincon de Guanabo	2	8	Dictyota	9
Rincon de Guanabo	2	9	Dictyota	25
Rincon de Guanabo	2	10	Dictyota	30
Rincon de Guanabo	2	1	encrusting red algae	45
Rincon de Guanabo	2	2	encrusting red algae	21
Rincon de Guanabo	2	3	encrusting red algae	42
Rincon de Guanabo	2	4	encrusting red algae	55
Rincon de Guanabo	2	5	encrusting red algae	39
Rincon de Guanabo	2	6	encrusting red algae	28
Rincon de Guanabo	2	7	encrusting red algae	23
Rincon de Guanabo	2	8	encrusting red algae	49
Rincon de Guanabo	2	9	encrusting red algae	36
Rincon de Guanabo	2	10	encrusting red algae	34
Rincon de Guanabo	2	1	filamentous algae	0
Rincon de Guanabo	2	2	filamentous algae	3
Rincon de Guanabo	2	3	filamentous algae	0
Rincon de Guanabo	2	4	filamentous algae	0
Rincon de Guanabo	2	5	filamentous algae	0
Rincon de Guanabo	2	6	filamentous algae	0
Rincon de Guanabo	2	7	filamentous algae	5
Rincon de Guanabo	2	8	filamentous algae	0
Rincon de Guanabo	2	9	filamentous algae	0
Rincon de Guanabo	2	10	filamentous algae	0
Rincon de Guanabo	2	1	articulated calcareous algae	0
Rincon de Guanabo	2	2	articulated calcareous algae	4
Rincon de Guanabo	2	3	articulated calcareous algae	3
Rincon de Guanabo	2	4	articulated calcareous algae	1
Rincon de Guanabo	2	5	articulated calcareous algae	9
Rincon de Guanabo	2	6	articulated calcareous algae	8
Rincon de Guanabo	2	7	articulated calcareous algae	0
Rincon de Guanabo	2	8	articulated calcareous algae	5
Rincon de Guanabo	2	9	articulated calcareous algae	5
Rincon de Guanabo	2	10	articulated calcareous algae	2
Rincon de Guanabo	3	1	Turf	5
Rincon de Guanabo	3	2	Turf	12
Rincon de Guanabo	3	3	Turf	8
Rincon de Guanabo	3	4	Turf	17
Rincon de Guanabo	3	5	Turf	15
Rincon de Guanabo	3	6	Turf	6
Rincon de Guanabo	3	7	Turf	19
Rincon de Guanabo	3	8	Turf	6
Rincon de Guanabo	3	9	Turf	16
Rincon de Guanabo	3	10	Turf	10
Rincon de Guanabo	3	1	TAS	0
Rincon de Guanabo	3	2	TAS	3
Rincon de Guanabo	3	3	TAS	0
Rincon de Guanabo	3	4	TAS	4
Rincon de Guanabo	3	5	TAS	13
Rincon de Guanabo	3	6	TAS	22
Rincon de Guanabo	3	7	TAS	0
Rincon de Guanabo	3	8	TAS	5
Rincon de Guanabo	3	9	TAS	2
Rincon de Guanabo	3	10	TAS	0
Rincon de Guanabo	3	1	fleshy macroalgae	31
Rincon de Guanabo	3	2	fleshy macroalgae	40
Rincon de Guanabo	3	3	fleshy macroalgae	36
Rincon de Guanabo	3	4	fleshy macroalgae	57
Rincon de Guanabo	3	5	fleshy macroalgae	18
Rincon de Guanabo	3	6	fleshy macroalgae	39
Rincon de Guanabo	3	7	fleshy macroalgae	27
Rincon de Guanabo	3	8	fleshy macroalgae	42
Rincon de Guanabo	3	9	fleshy macroalgae	25
Rincon de Guanabo	3	10	fleshy macroalgae	31
Rincon de Guanabo	3	1	Dictyota	26
Rincon de Guanabo	3	2	Dictyota	22
Rincon de Guanabo	3	3	Dictyota	22
Rincon de Guanabo	3	4	Dictyota	25
Rincon de Guanabo	3	5	Dictyota	8
Rincon de Guanabo	3	6	Dictyota	13
Rincon de Guanabo	3	7	Dictyota	17
Rincon de Guanabo	3	8	Dictyota	23
Rincon de Guanabo	3	9	Dictyota	18
Rincon de Guanabo	3	10	Dictyota	23
Rincon de Guanabo	3	1	encrusting red algae	31
Rincon de Guanabo	3	2	encrusting red algae	23
Rincon de Guanabo	3	3	encrusting red algae	22
Rincon de Guanabo	3	4	encrusting red algae	11
Rincon de Guanabo	3	5	encrusting red algae	18
Rincon de Guanabo	3	6	encrusting red algae	4
Rincon de Guanabo	3	7	encrusting red algae	16
Rincon de Guanabo	3	8	encrusting red algae	25
Rincon de Guanabo	3	9	encrusting red algae	35
Rincon de Guanabo	3	10	encrusting red algae	32
Rincon de Guanabo	3	1	filamentous algae	0
Rincon de Guanabo	3	2	filamentous algae	3
Rincon de Guanabo	3	3	filamentous algae	2
Rincon de Guanabo	3	4	filamentous algae	7
Rincon de Guanabo	3	5	filamentous algae	2
Rincon de Guanabo	3	6	filamentous algae	9
Rincon de Guanabo	3	7	filamentous algae	0
Rincon de Guanabo	3	8	filamentous algae	4
Rincon de Guanabo	3	9	filamentous algae	0
Rincon de Guanabo	3	10	filamentous algae	0
Rincon de Guanabo	3	1	articulated calcareous algae	2
Rincon de Guanabo	3	2	articulated calcareous algae	13
Rincon de Guanabo	3	3	articulated calcareous algae	8
Rincon de Guanabo	3	4	articulated calcareous algae	12
Rincon de Guanabo	3	5	articulated calcareous algae	4
Rincon de Guanabo	3	6	articulated calcareous algae	4
Rincon de Guanabo	3	7	articulated calcareous algae	4
Rincon de Guanabo	3	8	articulated calcareous algae	9
Rincon de Guanabo	3	9	articulated calcareous algae	6
Rincon de Guanabo	3	10	articulated calcareous algae	4
Rincon de Guanabo	4	1	Turf	0
Rincon de Guanabo	4	2	Turf	2
Rincon de Guanabo	4	3	Turf	2
Rincon de Guanabo	4	4	Turf	9
Rincon de Guanabo	4	5	Turf	8
Rincon de Guanabo	4	6	Turf	2
Rincon de Guanabo	4	7	Turf	7
Rincon de Guanabo	4	8	Turf	12
Rincon de Guanabo	4	9	Turf	6
Rincon de Guanabo	4	10	Turf	14
Rincon de Guanabo	4	1	TAS	0
Rincon de Guanabo	4	2	TAS	0
Rincon de Guanabo	4	3	TAS	0
Rincon de Guanabo	4	4	TAS	14
Rincon de Guanabo	4	5	TAS	1
Rincon de Guanabo	4	6	TAS	0
Rincon de Guanabo	4	7	TAS	0
Rincon de Guanabo	4	8	TAS	8
Rincon de Guanabo	4	9	TAS	2
Rincon de Guanabo	4	10	TAS	11
Rincon de Guanabo	4	1	fleshy macroalgae	32
Rincon de Guanabo	4	2	fleshy macroalgae	43
Rincon de Guanabo	4	3	fleshy macroalgae	53
Rincon de Guanabo	4	4	fleshy macroalgae	25
Rincon de Guanabo	4	5	fleshy macroalgae	27
Rincon de Guanabo	4	6	fleshy macroalgae	19
Rincon de Guanabo	4	7	fleshy macroalgae	25
Rincon de Guanabo	4	8	fleshy macroalgae	20
Rincon de Guanabo	4	9	fleshy macroalgae	22
Rincon de Guanabo	4	10	fleshy macroalgae	42
Rincon de Guanabo	4	1	Dictyota	24
Rincon de Guanabo	4	2	Dictyota	22
Rincon de Guanabo	4	3	Dictyota	41
Rincon de Guanabo	4	4	Dictyota	18
Rincon de Guanabo	4	5	Dictyota	12
Rincon de Guanabo	4	6	Dictyota	13
Rincon de Guanabo	4	7	Dictyota	18
Rincon de Guanabo	4	8	Dictyota	14
Rincon de Guanabo	4	9	Dictyota	18
Rincon de Guanabo	4	10	Dictyota	26
Rincon de Guanabo	4	1	encrusting red algae	32
Rincon de Guanabo	4	2	encrusting red algae	24
Rincon de Guanabo	4	3	encrusting red algae	18
Rincon de Guanabo	4	4	encrusting red algae	38
Rincon de Guanabo	4	5	encrusting red algae	36
Rincon de Guanabo	4	6	encrusting red algae	46
Rincon de Guanabo	4	7	encrusting red algae	41
Rincon de Guanabo	4	8	encrusting red algae	42
Rincon de Guanabo	4	9	encrusting red algae	54
Rincon de Guanabo	4	10	encrusting red algae	12
Rincon de Guanabo	4	1	filamentous algae	0
Rincon de Guanabo	4	2	filamentous algae	0
Rincon de Guanabo	4	3	filamentous algae	0
Rincon de Guanabo	4	4	filamentous algae	0
Rincon de Guanabo	4	5	filamentous algae	6
Rincon de Guanabo	4	6	filamentous algae	0
Rincon de Guanabo	4	7	filamentous algae	0
Rincon de Guanabo	4	8	filamentous algae	0
Rincon de Guanabo	4	9	filamentous algae	0
Rincon de Guanabo	4	10	filamentous algae	6
Rincon de Guanabo	4	1	articulated calcareous algae	1
Rincon de Guanabo	4	2	articulated calcareous algae	9
Rincon de Guanabo	4	3	articulated calcareous algae	4
Rincon de Guanabo	4	4	articulated calcareous algae	7
Rincon de Guanabo	4	5	articulated calcareous algae	7
Rincon de Guanabo	4	6	articulated calcareous algae	5
Rincon de Guanabo	4	7	articulated calcareous algae	7
Rincon de Guanabo	4	8	articulated calcareous algae	3
Rincon de Guanabo	4	9	articulated calcareous algae	3
Rincon de Guanabo	4	10	articulated calcareous algae	7
Rincon de Guanabo	5	1	Turf	6
Rincon de Guanabo	5	2	Turf	3
Rincon de Guanabo	5	3	Turf	2
Rincon de Guanabo	5	4	Turf	2
Rincon de Guanabo	5	5	Turf	2
Rincon de Guanabo	5	6	Turf	4
Rincon de Guanabo	5	7	Turf	5
Rincon de Guanabo	5	8	Turf	3
Rincon de Guanabo	5	9	Turf	2
Rincon de Guanabo	5	10	Turf	5
Rincon de Guanabo	5	1	TAS	1
Rincon de Guanabo	5	2	TAS	22
Rincon de Guanabo	5	3	TAS	28
Rincon de Guanabo	5	4	TAS	31
Rincon de Guanabo	5	5	TAS	27
Rincon de Guanabo	5	6	TAS	17
Rincon de Guanabo	5	7	TAS	16
Rincon de Guanabo	5	8	TAS	12
Rincon de Guanabo	5	9	TAS	26
Rincon de Guanabo	5	10	TAS	0
Rincon de Guanabo	5	1	fleshy macroalgae	53
Rincon de Guanabo	5	2	fleshy macroalgae	44
Rincon de Guanabo	5	3	fleshy macroalgae	39
Rincon de Guanabo	5	4	fleshy macroalgae	45
Rincon de Guanabo	5	5	fleshy macroalgae	25
Rincon de Guanabo	5	6	fleshy macroalgae	38
Rincon de Guanabo	5	7	fleshy macroalgae	55
Rincon de Guanabo	5	8	fleshy macroalgae	29
Rincon de Guanabo	5	9	fleshy macroalgae	36
Rincon de Guanabo	5	10	fleshy macroalgae	28
Rincon de Guanabo	5	1	Dictyota	10
Rincon de Guanabo	5	2	Dictyota	18
Rincon de Guanabo	5	3	Dictyota	14
Rincon de Guanabo	5	4	Dictyota	4
Rincon de Guanabo	5	5	Dictyota	17
Rincon de Guanabo	5	6	Dictyota	8
Rincon de Guanabo	5	7	Dictyota	9
Rincon de Guanabo	5	8	Dictyota	22
Rincon de Guanabo	5	9	Dictyota	19
Rincon de Guanabo	5	10	Dictyota	20
Rincon de Guanabo	5	1	encrusting red algae	20
Rincon de Guanabo	5	2	encrusting red algae	13
Rincon de Guanabo	5	3	encrusting red algae	9
Rincon de Guanabo	5	4	encrusting red algae	4
Rincon de Guanabo	5	5	encrusting red algae	28
Rincon de Guanabo	5	6	encrusting red algae	19
Rincon de Guanabo	5	7	encrusting red algae	16
Rincon de Guanabo	5	8	encrusting red algae	26
Rincon de Guanabo	5	9	encrusting red algae	12
Rincon de Guanabo	5	10	encrusting red algae	34
Rincon de Guanabo	5	1	filamentous algae	22
Rincon de Guanabo	5	2	filamentous algae	21
Rincon de Guanabo	5	3	filamentous algae	21
Rincon de Guanabo	5	4	filamentous algae	16
Rincon de Guanabo	5	5	filamentous algae	2
Rincon de Guanabo	5	6	filamentous algae	14
Rincon de Guanabo	5	7	filamentous algae	30
Rincon de Guanabo	5	8	filamentous algae	2
Rincon de Guanabo	5	9	filamentous algae	7
Rincon de Guanabo	5	10	filamentous algae	0
Rincon de Guanabo	5	1	articulated calcareous algae	6
Rincon de Guanabo	5	2	articulated calcareous algae	0
Rincon de Guanabo	5	3	articulated calcareous algae	1
Rincon de Guanabo	5	4	articulated calcareous algae	14
Rincon de Guanabo	5	5	articulated calcareous algae	4
Rincon de Guanabo	5	6	articulated calcareous algae	9
Rincon de Guanabo	5	7	articulated calcareous algae	10
Rincon de Guanabo	5	8	articulated calcareous algae	4
Rincon de Guanabo	5	9	articulated calcareous algae	4
Rincon de Guanabo	5	10	articulated calcareous algae	8
Rincon de Guanabo	6	1	Turf	5
Rincon de Guanabo	6	2	Turf	12
Rincon de Guanabo	6	3	Turf	9
Rincon de Guanabo	6	4	Turf	0
Rincon de Guanabo	6	5	Turf	0
Rincon de Guanabo	6	6	Turf	17
Rincon de Guanabo	6	7	Turf	2
Rincon de Guanabo	6	8	Turf	6
Rincon de Guanabo	6	9	Turf	13
Rincon de Guanabo	6	10	Turf	0
Rincon de Guanabo	6	1	TAS	33
Rincon de Guanabo	6	2	TAS	17
Rincon de Guanabo	6	3	TAS	13
Rincon de Guanabo	6	4	TAS	2
Rincon de Guanabo	6	5	TAS	30
Rincon de Guanabo	6	6	TAS	9
Rincon de Guanabo	6	7	TAS	24
Rincon de Guanabo	6	8	TAS	1
Rincon de Guanabo	6	9	TAS	4
Rincon de Guanabo	6	10	TAS	16
Rincon de Guanabo	6	1	fleshy macroalgae	36
Rincon de Guanabo	6	2	fleshy macroalgae	54
Rincon de Guanabo	6	3	fleshy macroalgae	50
Rincon de Guanabo	6	4	fleshy macroalgae	34
Rincon de Guanabo	6	5	fleshy macroalgae	55
Rincon de Guanabo	6	6	fleshy macroalgae	46
Rincon de Guanabo	6	7	fleshy macroalgae	40
Rincon de Guanabo	6	8	fleshy macroalgae	46
Rincon de Guanabo	6	9	fleshy macroalgae	35
Rincon de Guanabo	6	10	fleshy macroalgae	45
Rincon de Guanabo	6	1	Dictyota	0
Rincon de Guanabo	6	2	Dictyota	7
Rincon de Guanabo	6	3	Dictyota	3
Rincon de Guanabo	6	4	Dictyota	29
Rincon de Guanabo	6	5	Dictyota	5
Rincon de Guanabo	6	6	Dictyota	16
Rincon de Guanabo	6	7	Dictyota	8
Rincon de Guanabo	6	8	Dictyota	11
Rincon de Guanabo	6	9	Dictyota	11
Rincon de Guanabo	6	10	Dictyota	18
Rincon de Guanabo	6	1	encrusting red algae	3
Rincon de Guanabo	6	2	encrusting red algae	3
Rincon de Guanabo	6	3	encrusting red algae	8
Rincon de Guanabo	6	4	encrusting red algae	31
Rincon de Guanabo	6	5	encrusting red algae	5
Rincon de Guanabo	6	6	encrusting red algae	12
Rincon de Guanabo	6	7	encrusting red algae	11
Rincon de Guanabo	6	8	encrusting red algae	21
Rincon de Guanabo	6	9	encrusting red algae	32
Rincon de Guanabo	6	10	encrusting red algae	31
Rincon de Guanabo	6	1	filamentous algae	24
Rincon de Guanabo	6	2	filamentous algae	33
Rincon de Guanabo	6	3	filamentous algae	25
Rincon de Guanabo	6	4	filamentous algae	0
Rincon de Guanabo	6	5	filamentous algae	37
Rincon de Guanabo	6	6	filamentous algae	12
Rincon de Guanabo	6	7	filamentous algae	21
Rincon de Guanabo	6	8	filamentous algae	26
Rincon de Guanabo	6	9	filamentous algae	15
Rincon de Guanabo	6	10	filamentous algae	17
Rincon de Guanabo	6	1	articulated calcareous algae	6
Rincon de Guanabo	6	2	articulated calcareous algae	6
Rincon de Guanabo	6	3	articulated calcareous algae	8
Rincon de Guanabo	6	4	articulated calcareous algae	4
Rincon de Guanabo	6	5	articulated calcareous algae	7
Rincon de Guanabo	6	6	articulated calcareous algae	14
Rincon de Guanabo	6	7	articulated calcareous algae	2
Rincon de Guanabo	6	8	articulated calcareous algae	6
Rincon de Guanabo	6	9	articulated calcareous algae	6
Rincon de Guanabo	6	10	articulated calcareous algae	5

## Sheet: density of D. antillarum 
Year	Reef	Station	Transect	Density of D. antillarum (ind. 10 m-2)
2005	Playa Baracoa	E1	1	46
2005	Playa Baracoa	E1	2	35
2005	Playa Baracoa	E1	3	22
2005	Playa Baracoa	E1	4	40
2005	Playa Baracoa	E1	5	55
2005	Playa Baracoa	E1	6	26
2005	Playa Baracoa	E1	7	40
2005	Playa Baracoa	E1	8	49
2005	Playa Baracoa	E1	9	28
2005	Playa Baracoa	E1	10	62
2005	Playa Baracoa	E2	1	35
2005	Playa Baracoa	E2	2	28
2005	Playa Baracoa	E2	3	36
2005	Playa Baracoa	E2	4	36
2005	Playa Baracoa	E2	5	34
2005	Playa Baracoa	E2	6	43
2005	Playa Baracoa	E2	7	27
2005	Playa Baracoa	E2	8	35
2005	Playa Baracoa	E2	9	19
2005	Playa Baracoa	E2	10	17
2005	Playa Baracoa	E3	1	21
2005	Playa Baracoa	E3	2	38
2005	Playa Baracoa	E3	3	19
2005	Playa Baracoa	E3	4	26
2005	Playa Baracoa	E3	5	17
2005	Playa Baracoa	E3	6	24
2005	Playa Baracoa	E3	7	36
2005	Playa Baracoa	E3	8	14
2005	Playa Baracoa	E3	9	13
2005	Playa Baracoa	E3	10	11
2005	Playa Baracoa	E4	1	26
2005	Playa Baracoa	E4	2	9
2005	Playa Baracoa	E4	3	12
2005	Playa Baracoa	E4	4	4
2005	Playa Baracoa	E4	5	25
2005	Playa Baracoa	E4	6	26
2005	Playa Baracoa	E4	7	20
2005	Playa Baracoa	E4	8	18
2005	Playa Baracoa	E4	9	27
2005	Playa Baracoa	E4	10	24
2008	Playa Baracoa	E1	1	5
2008	Playa Baracoa	E1	2	10
2008	Playa Baracoa	E1	3	8
2008	Playa Baracoa	E1	4	7
2008	Playa Baracoa	E1	5	20
2008	Playa Baracoa	E1	6	12
2008	Playa Baracoa	E1	7	9
2008	Playa Baracoa	E1	8	23
2008	Playa Baracoa	E1	9	17
2008	Playa Baracoa	E1	10	19
2008	Playa Baracoa	E2	1	29
2008	Playa Baracoa	E2	2	19
2008	Playa Baracoa	E2	3	21
2008	Playa Baracoa	E2	4	30
2008	Playa Baracoa	E2	5	27
2008	Playa Baracoa	E2	6	16
2008	Playa Baracoa	E2	7	20
2008	Playa Baracoa	E2	8	15
2008	Playa Baracoa	E2	9	16
2008	Playa Baracoa	E2	10	21
2008	Playa Baracoa	E2	1	16
2008	Playa Baracoa	E2	2	12
2008	Playa Baracoa	E3	3	10
2008	Playa Baracoa	E3	4	19
2008	Playa Baracoa	E3	5	14
2008	Playa Baracoa	E3	6	12
2008	Playa Baracoa	E3	7	29
2008	Playa Baracoa	E3	8	21
2008	Playa Baracoa	E3	9	16
2008	Playa Baracoa	E3	10	20
2008	Playa Baracoa	E3	1	17
2008	Playa Baracoa	E3	2	12
2008	Playa Baracoa	E4	3	12
2008	Playa Baracoa	E4	4	8
2008	Playa Baracoa	E4	5	15
2008	Playa Baracoa	E4	6	23
2008	Playa Baracoa	E4	7	19
2008	Playa Baracoa	E4	8	21
2008	Playa Baracoa	E4	9	20
2008	Playa Baracoa	E4	10	10
2008	Playa Baracoa	E4	1	13
2008	Playa Baracoa	E4	2	12
2008	Playa Baracoa	E5	3	3
2008	Playa Baracoa	E5	4	8
2008	Playa Baracoa	E5	5	23
2008	Playa Baracoa	E5	6	17
2008	Playa Baracoa	E5	7	19
2008	Playa Baracoa	E5	8	15
2008	Playa Baracoa	E5	9	20
2008	Playa Baracoa	E5	10	13
2008	Playa Baracoa	E5	1	17
2008	Playa Baracoa	E5	2	12
2008	Playa Baracoa	E6	3	6
2008	Playa Baracoa	E6	4	12
2008	Playa Baracoa	E6	5	30
2008	Playa Baracoa	E6	6	21
2008	Playa Baracoa	E6	7	30
2008	Playa Baracoa	E6	8	25
2008	Playa Baracoa	E6	9	34
2008	Playa Baracoa	E6	10	29
2015	Playa Baracoa	E1	1	18
2015	Playa Baracoa	E1	2	14
2015	Playa Baracoa	E1	3	22
2015	Playa Baracoa	E1	4	16
2015	Playa Baracoa	E1	5	23
2015	Playa Baracoa	E1	6	39
2015	Playa Baracoa	E1	7	21
2015	Playa Baracoa	E1	8	11
2015	Playa Baracoa	E1	9	8
2015	Playa Baracoa	E1	10	12
2015	Playa Baracoa	E2	1	24
2015	Playa Baracoa	E2	2	24
2015	Playa Baracoa	E2	3	15
2015	Playa Baracoa	E2	4	7
2015	Playa Baracoa	E2	5	26
2015	Playa Baracoa	E2	6	17
2015	Playa Baracoa	E2	7	13
2015	Playa Baracoa	E2	8	8
2015	Playa Baracoa	E2	9	8
2015	Playa Baracoa	E2	10	6
2015	Playa Baracoa	E3	1	24
2015	Playa Baracoa	E3	2	27
2015	Playa Baracoa	E3	3	10
2015	Playa Baracoa	E3	4	9
2015	Playa Baracoa	E3	5	4
2015	Playa Baracoa	E3	6	36
2015	Playa Baracoa	E3	7	20
2015	Playa Baracoa	E3	8	5
2015	Playa Baracoa	E3	9	1
2015	Playa Baracoa	E3	10	2
2015	Playa Baracoa	E4	1	0
2015	Playa Baracoa	E4	2	1
2015	Playa Baracoa	E4	3	1
2015	Playa Baracoa	E4	4	0
2015	Playa Baracoa	E4	5	15
2015	Playa Baracoa	E4	6	1
2015	Playa Baracoa	E4	7	3
2015	Playa Baracoa	E4	8	0
2015	Playa Baracoa	E4	9	0
2015	Playa Baracoa	E4	10	12
2015	Playa Baracoa	E5	1	10
2015	Playa Baracoa	E5	2	24
2015	Playa Baracoa	E5	3	13
2015	Playa Baracoa	E5	4	16
2015	Playa Baracoa	E5	5	11
2015	Playa Baracoa	E5	6	13
2015	Playa Baracoa	E5	7	38
2015	Playa Baracoa	E5	8	35
2015	Playa Baracoa	E5	9	2
2015	Playa Baracoa	E5	10	9
2015	Playa Baracoa	E6	1	22
2015	Playa Baracoa	E6	2	8
2015	Playa Baracoa	E6	3	25
2015	Playa Baracoa	E6	4	14
2015	Playa Baracoa	E6	5	17
2015	Playa Baracoa	E6	6	24
2015	Playa Baracoa	E6	7	12
2015	Playa Baracoa	E6	8	19
2015	Playa Baracoa	E6	9	11
2015	Playa Baracoa	E6	10	16
2021	Playa Baracoa	E1	1	21
2021	Playa Baracoa	E1	2	22
2021	Playa Baracoa	E1	3	28
2021	Playa Baracoa	E1	4	18
2021	Playa Baracoa	E1	5	13
2021	Playa Baracoa	E1	6	14
2021	Playa Baracoa	E1	7	10
2021	Playa Baracoa	E1	8	25
2021	Playa Baracoa	E1	9	31
2021	Playa Baracoa	E1	10	48
2021	Playa Baracoa	E2	1	25
2021	Playa Baracoa	E2	2	28
2021	Playa Baracoa	E2	3	26
2021	Playa Baracoa	E2	4	17
2021	Playa Baracoa	E2	5	1
2021	Playa Baracoa	E2	6	6
2021	Playa Baracoa	E2	7	60
2021	Playa Baracoa	E2	8	26
2021	Playa Baracoa	E2	9	15
2021	Playa Baracoa	E2	10	16
2021	Playa Baracoa	E3	1	30
2021	Playa Baracoa	E3	2	9
2021	Playa Baracoa	E3	3	5
2021	Playa Baracoa	E3	4	35
2021	Playa Baracoa	E3	5	8
2021	Playa Baracoa	E3	6	24
2021	Playa Baracoa	E3	7	34
2021	Playa Baracoa	E3	8	3
2021	Playa Baracoa	E3	9	47
2021	Playa Baracoa	E3	10	24
2021	Playa Baracoa	E4	1	15
2021	Playa Baracoa	E4	2	9
2021	Playa Baracoa	E4	3	2
2021	Playa Baracoa	E4	4	7
2021	Playa Baracoa	E4	5	20
2021	Playa Baracoa	E4	6	24
2021	Playa Baracoa	E4	7	47
2021	Playa Baracoa	E4	8	18
2021	Playa Baracoa	E4	9	15
2021	Playa Baracoa	E4	10	32
2021	Playa Baracoa	E5	1	19
2021	Playa Baracoa	E5	2	3
2021	Playa Baracoa	E5	3	19
2021	Playa Baracoa	E5	4	7
2021	Playa Baracoa	E5	5	13
2021	Playa Baracoa	E5	6	64
2021	Playa Baracoa	E5	7	2
2021	Playa Baracoa	E5	8	10
2021	Playa Baracoa	E5	9	5
2021	Playa Baracoa	E5	10	9
2021	Playa Baracoa	E6	1	15
2021	Playa Baracoa	E6	2	46
2021	Playa Baracoa	E6	3	21
2021	Playa Baracoa	E6	4	27
2021	Playa Baracoa	E6	5	5
2021	Playa Baracoa	E6	6	11
2021	Playa Baracoa	E6	7	8
2021	Playa Baracoa	E6	8	5
2021	Playa Baracoa	E6	9	5
2021	Playa Baracoa	E6	10	5
2008	Rincon de Guanabo	E1	1	4
2008	Rincon de Guanabo	E1	2	3
2008	Rincon de Guanabo	E1	3	2
2008	Rincon de Guanabo	E1	4	5
2008	Rincon de Guanabo	E1	5	2
2008	Rincon de Guanabo	E1	6	8
2008	Rincon de Guanabo	E1	7	10
2008	Rincon de Guanabo	E1	8	9
2008	Rincon de Guanabo	E1	9	7
2008	Rincon de Guanabo	E1	10	5
2008	Rincon de Guanabo	E2	1	3
2008	Rincon de Guanabo	E2	2	2
2008	Rincon de Guanabo	E2	3	2
2008	Rincon de Guanabo	E2	4	3
2008	Rincon de Guanabo	E2	5	0
2008	Rincon de Guanabo	E2	6	5
2008	Rincon de Guanabo	E2	7	7
2008	Rincon de Guanabo	E2	8	0
2008	Rincon de Guanabo	E2	9	3
2008	Rincon de Guanabo	E2	10	1
2008	Rincon de Guanabo	E3	1	0
2008	Rincon de Guanabo	E3	2	0
2008	Rincon de Guanabo	E3	3	2
2008	Rincon de Guanabo	E3	4	0
2008	Rincon de Guanabo	E3	5	0
2008	Rincon de Guanabo	E3	6	0
2008	Rincon de Guanabo	E3	7	2
2008	Rincon de Guanabo	E3	8	0
2008	Rincon de Guanabo	E3	9	1
2008	Rincon de Guanabo	E3	10	0
2008	Rincon de Guanabo	E4	1	0
2008	Rincon de Guanabo	E4	2	0
2008	Rincon de Guanabo	E4	3	0
2008	Rincon de Guanabo	E4	4	0
2008	Rincon de Guanabo	E4	5	0
2008	Rincon de Guanabo	E4	6	0
2008	Rincon de Guanabo	E4	7	0
2008	Rincon de Guanabo	E4	8	0
2008	Rincon de Guanabo	E4	9	0
2008	Rincon de Guanabo	E4	10	0
2008	Rincon de Guanabo	E5	1	0
2008	Rincon de Guanabo	E5	2	0
2008	Rincon de Guanabo	E5	3	0
2008	Rincon de Guanabo	E5	4	0
2008	Rincon de Guanabo	E5	5	0
2008	Rincon de Guanabo	E5	6	0
2008	Rincon de Guanabo	E5	7	0
2008	Rincon de Guanabo	E5	8	0
2008	Rincon de Guanabo	E5	9	0
2008	Rincon de Guanabo	E5	10	0
2008	Rincon de Guanabo	E6	1	0
2008	Rincon de Guanabo	E6	2	0
2008	Rincon de Guanabo	E6	3	0
2008	Rincon de Guanabo	E6	4	0
2008	Rincon de Guanabo	E6	5	0
2008	Rincon de Guanabo	E6	6	0
2008	Rincon de Guanabo	E6	7	0
2008	Rincon de Guanabo	E6	8	0
2008	Rincon de Guanabo	E6	9	0
2008	Rincon de Guanabo	E6	10	0
2015	Rincon de Guanabo	E1	1	0
2015	Rincon de Guanabo	E1	2	0
2015	Rincon de Guanabo	E1	3	0
2015	Rincon de Guanabo	E1	4	0
2015	Rincon de Guanabo	E1	5	0
2015	Rincon de Guanabo	E1	6	0
2015	Rincon de Guanabo	E1	7	0
2015	Rincon de Guanabo	E1	8	0
2015	Rincon de Guanabo	E1	9	0
2015	Rincon de Guanabo	E1	10	0
2015	Rincon de Guanabo	E2	1	0
2015	Rincon de Guanabo	E2	2	0
2015	Rincon de Guanabo	E2	3	0
2015	Rincon de Guanabo	E2	4	0
2015	Rincon de Guanabo	E2	5	0
2015	Rincon de Guanabo	E2	6	0
2015	Rincon de Guanabo	E2	7	0
2015	Rincon de Guanabo	E2	8	0
2015	Rincon de Guanabo	E2	9	0
2015	Rincon de Guanabo	E2	10	0
2015	Rincon de Guanabo	E3	1	0
2015	Rincon de Guanabo	E3	2	0
2015	Rincon de Guanabo	E3	3	0
2015	Rincon de Guanabo	E3	4	0
2015	Rincon de Guanabo	E3	5	0
2015	Rincon de Guanabo	E3	6	0
2015	Rincon de Guanabo	E3	7	0
2015	Rincon de Guanabo	E3	8	0
2015	Rincon de Guanabo	E3	9	0
2015	Rincon de Guanabo	E3	10	0
2015	Rincon de Guanabo	E4	1	0
2015	Rincon de Guanabo	E4	2	0
2015	Rincon de Guanabo	E4	3	0
2015	Rincon de Guanabo	E4	4	0
2015	Rincon de Guanabo	E4	5	0
2015	Rincon de Guanabo	E4	6	0
2015	Rincon de Guanabo	E4	7	0
2015	Rincon de Guanabo	E4	8	0
2015	Rincon de Guanabo	E4	9	0
2015	Rincon de Guanabo	E4	10	0
2015	Rincon de Guanabo	E5	1	0
2015	Rincon de Guanabo	E5	2	0
2015	Rincon de Guanabo	E5	3	0
2015	Rincon de Guanabo	E5	4	1
2015	Rincon de Guanabo	E5	5	0
2015	Rincon de Guanabo	E5	6	0
2015	Rincon de Guanabo	E5	7	0
2015	Rincon de Guanabo	E5	8	0
2015	Rincon de Guanabo	E5	9	1
2015	Rincon de Guanabo	E5	10	0
2015	Rincon de Guanabo	E6	1	0
2015	Rincon de Guanabo	E6	2	0
2015	Rincon de Guanabo	E6	3	0
2015	Rincon de Guanabo	E6	4	0
2015	Rincon de Guanabo	E6	5	0
2015	Rincon de Guanabo	E6	6	0
2015	Rincon de Guanabo	E6	7	0
2015	Rincon de Guanabo	E6	8	0
2015	Rincon de Guanabo	E6	9	0
2015	Rincon de Guanabo	E6	10	0
2021	Rincon de Guanabo	E1	1	0
2021	Rincon de Guanabo	E1	2	1
2021	Rincon de Guanabo	E1	3	1
2021	Rincon de Guanabo	E1	4	0
2021	Rincon de Guanabo	E1	5	3
2021	Rincon de Guanabo	E1	6	0
2021	Rincon de Guanabo	E1	7	0
2021	Rincon de Guanabo	E1	8	0
2021	Rincon de Guanabo	E1	9	0
2021	Rincon de Guanabo	E1	10	0
2021	Rincon de Guanabo	E2	1	2
2021	Rincon de Guanabo	E2	2	1
2021	Rincon de Guanabo	E2	3	1
2021	Rincon de Guanabo	E2	4	0
2021	Rincon de Guanabo	E2	5	0
2021	Rincon de Guanabo	E2	6	0
2021	Rincon de Guanabo	E2	7	0
2021	Rincon de Guanabo	E2	8	0
2021	Rincon de Guanabo	E2	9	0
2021	Rincon de Guanabo	E2	10	0
2021	Rincon de Guanabo	E3	1	2
2021	Rincon de Guanabo	E3	2	0
2021	Rincon de Guanabo	E3	3	2
2021	Rincon de Guanabo	E3	4	0
2021	Rincon de Guanabo	E3	5	0
2021	Rincon de Guanabo	E3	6	0
2021	Rincon de Guanabo	E3	7	0
2021	Rincon de Guanabo	E3	8	0
2021	Rincon de Guanabo	E3	9	0
2021	Rincon de Guanabo	E3	10	0
2021	Rincon de Guanabo	E4	1	0
2021	Rincon de Guanabo	E4	2	0
2021	Rincon de Guanabo	E4	3	0
2021	Rincon de Guanabo	E4	4	0
2021	Rincon de Guanabo	E4	5	0
2021	Rincon de Guanabo	E4	6	0
2021	Rincon de Guanabo	E4	7	0
2021	Rincon de Guanabo	E4	8	0
2021	Rincon de Guanabo	E4	9	0
2021	Rincon de Guanabo	E4	10	0
2021	Rincon de Guanabo	E5	1	0
2021	Rincon de Guanabo	E5	2	0
2021	Rincon de Guanabo	E5	3	0
2021	Rincon de Guanabo	E5	4	0
2021	Rincon de Guanabo	E5	5	0
2021	Rincon de Guanabo	E5	6	0
2021	Rincon de Guanabo	E5	7	0
2021	Rincon de Guanabo	E5	8	0
2021	Rincon de Guanabo	E5	9	0
2021	Rincon de Guanabo	E5	10	0
2021	Rincon de Guanabo	E6	1	2
2021	Rincon de Guanabo	E6	2	0
2021	Rincon de Guanabo	E6	3	1
2021	Rincon de Guanabo	E6	4	0
2021	Rincon de Guanabo	E6	5	0
2021	Rincon de Guanabo	E6	6	0
2021	Rincon de Guanabo	E6	7	0
2021	Rincon de Guanabo	E6	8	0
2021	Rincon de Guanabo	E6	9	0
2021	Rincon de Guanabo	E6	10	0

## Sheet: Temperature
Site	Year	Month	Temperature
Playa Baracoa	2012	June	27.961
Playa Baracoa	2012	June	27.961
Playa Baracoa	2012	June	27.961
Playa Baracoa	2012	June	27.961
Playa Baracoa	2012	June	28.06
Playa Baracoa	2012	June	28.06
Playa Baracoa	2012	June	28.06
Playa Baracoa	2012	June	27.961
Playa Baracoa	2012	June	27.961
Playa Baracoa	2012	June	27.961
Playa Baracoa	2012	June	27.862
Playa Baracoa	2012	June	27.764
Playa Baracoa	2012	June	27.764
Playa Baracoa	2012	June	27.764
Playa Baracoa	2012	June	27.764
Playa Baracoa	2012	June	27.764
Playa Baracoa	2012	June	27.764
Playa Baracoa	2012	June	27.665
Playa Baracoa	2012	June	27.764
Playa Baracoa	2012	June	27.764
Playa Baracoa	2012	June	27.764
Playa Baracoa	2012	June	27.764
Playa Baracoa	2012	June	27.862
Playa Baracoa	2012	June	27.862
Playa Baracoa	2012	June	27.862
Playa Baracoa	2012	June	27.862
Playa Baracoa	2012	June	27.862
Playa Baracoa	2012	June	27.862
Playa Baracoa	2012	June	27.961
Playa Baracoa	2012	June	27.862
Playa Baracoa	2012	June	27.862
Playa Baracoa	2012	June	27.862
Playa Baracoa	2012	June	27.862
Playa Baracoa	2012	June	27.862
Playa Baracoa	2012	June	27.862
Playa Baracoa	2012	June	27.961
Playa Baracoa	2012	June	27.961
Playa Baracoa	2012	June	27.961
Playa Baracoa	2012	June	27.961
Playa Baracoa	2012	June	27.961
Playa Baracoa	2012	June	27.961
Playa Baracoa	2012	June	27.961
Playa Baracoa	2012	June	27.961
Playa Baracoa	2012	June	27.961
Playa Baracoa	2012	June	27.961
Playa Baracoa	2012	June	27.961
Playa Baracoa	2012	June	27.961
Playa Baracoa	2012	June	27.961
Playa Baracoa	2012	June	27.862
Playa Baracoa	2012	June	27.961
Playa Baracoa	2012	June	27.961
Playa Baracoa	2012	June	27.961
Playa Baracoa	2012	June	27.961
Playa Baracoa	2012	June	27.961
Playa Baracoa	2012	June	27.961
Playa Baracoa	2012	June	27.961
Playa Baracoa	2012	June	27.961
Playa Baracoa	2012	June	27.961
Playa Baracoa	2012	June	27.961
Playa Baracoa	2012	June	27.961
Playa Baracoa	2012	June	27.961
Playa Baracoa	2012	June	27.961
Playa Baracoa	2012	June	27.961
Playa Baracoa	2012	June	27.961
Playa Baracoa	2012	June	27.961
Playa Baracoa	2012	June	27.961
Playa Baracoa	2012	June	27.961
Playa Baracoa	2012	June	27.961
Playa Baracoa	2012	June	27.961
Playa Baracoa	2012	June	27.961
Playa Baracoa	2012	June	27.961
Playa Baracoa	2012	June	27.961
Playa Baracoa	2012	June	27.961
Playa Baracoa	2012	June	28.06
Playa Baracoa	2012	June	28.06
Playa Baracoa	2012	June	27.961
Playa Baracoa	2012	June	28.06
Playa Baracoa	2012	June	28.06
Playa Baracoa	2012	June	28.06
Playa Baracoa	2012	June	28.06
Playa Baracoa	2012	June	28.06
Playa Baracoa	2012	June	27.961
Playa Baracoa	2012	June	28.06
Playa Baracoa	2012	June	27.961
Playa Baracoa	2012	June	28.06
Playa Baracoa	2012	June	28.06
Playa Baracoa	2012	June	28.06
Playa Baracoa	2012	June	28.06
Playa Baracoa	2012	June	27.961
Playa Baracoa	2012	June	27.961
Playa Baracoa	2012	June	28.06
Playa Baracoa	2012	June	28.06
Playa Baracoa	2012	June	28.06
Playa Baracoa	2012	June	28.06
Playa Baracoa	2012	June	28.159
Playa Baracoa	2012	June	28.159
Playa Baracoa	2012	June	28.159
Playa Baracoa	2012	June	28.159
Playa Baracoa	2012	June	28.06
Playa Baracoa	2012	June	27.961
Playa Baracoa	2012	June	28.06
Playa Baracoa	2012	June	28.06
Playa Baracoa	2012	June	28.06
Playa Baracoa	2012	June	28.06
Playa Baracoa	2012	June	27.961
Playa Baracoa	2012	June	27.961
Playa Baracoa	2012	June	27.961
Playa Baracoa	2012	June	27.961
Playa Baracoa	2012	June	27.961
Playa Baracoa	2012	June	27.961
Playa Baracoa	2012	June	27.862
Playa Baracoa	2012	June	27.862
Playa Baracoa	2012	June	27.862
Playa Baracoa	2012	June	27.862
Playa Baracoa	2012	June	27.862
Playa Baracoa	2012	June	27.862
Playa Baracoa	2012	June	27.862
Playa Baracoa	2012	June	27.961
Playa Baracoa	2012	June	27.961
Playa Baracoa	2012	June	27.961
Playa Baracoa	2012	June	27.862
Playa Baracoa	2012	June	27.862
Playa Baracoa	2012	June	27.862
Playa Baracoa	2012	June	27.862
Playa Baracoa	2012	June	27.862
Playa Baracoa	2012	June	27.961
Playa Baracoa	2012	June	27.961
Playa Baracoa	2012	June	27.961
Playa Baracoa	2012	June	27.862
Playa Baracoa	2012	June	27.764
Playa Baracoa	2012	June	27.764
Playa Baracoa	2012	June	27.764
Playa Baracoa	2012	June	27.764
Playa Baracoa	2012	June	27.764
Playa Baracoa	2012	June	27.764
Playa Baracoa	2012	June	27.764
Playa Baracoa	2012	June	27.764
Playa Baracoa	2012	June	27.764
Playa Baracoa	2012	June	27.764
Playa Baracoa	2012	June	27.764
Playa Baracoa	2012	June	27.764
Playa Baracoa	2012	June	27.764
Playa Baracoa	2012	June	27.764
Playa Baracoa	2012	June	27.764
Playa Baracoa	2012	June	27.764
Playa Baracoa	2012	June	27.764
Playa Baracoa	2012	June	27.764
Playa Baracoa	2012	June	27.764
Playa Baracoa	2012	June	27.764
Playa Baracoa	2012	June	27.764
Playa Baracoa	2012	June	27.665
Playa Baracoa	2012	June	27.665
Playa Baracoa	2012	June	27.665
Playa Baracoa	2012	June	27.665
Playa Baracoa	2012	June	27.764
Playa Baracoa	2012	June	27.764
Playa Baracoa	2012	June	27.764
Playa Baracoa	2012	June	27.764
Playa Baracoa	2012	June	27.764
Playa Baracoa	2012	June	27.764
Playa Baracoa	2012	June	27.764
Playa Baracoa	2012	June	27.665
Playa Baracoa	2012	June	27.567
Playa Baracoa	2012	June	27.567
Playa Baracoa	2012	June	27.567
Playa Baracoa	2012	June	27.468
Playa Baracoa	2012	June	27.468
Playa Baracoa	2012	June	27.567
Playa Baracoa	2012	June	27.468
Playa Baracoa	2012	June	27.468
Playa Baracoa	2012	June	27.468
Playa Baracoa	2012	June	27.468
Playa Baracoa	2012	June	27.468
Playa Baracoa	2012	June	27.468
Playa Baracoa	2012	June	27.468
Playa Baracoa	2012	June	27.468
Playa Baracoa	2012	June	27.468
Playa Baracoa	2012	June	27.468
Playa Baracoa	2012	June	27.468
Playa Baracoa	2012	June	27.468
Playa Baracoa	2012	June	27.37
Playa Baracoa	2012	June	27.37
Playa Baracoa	2012	June	27.37
Playa Baracoa	2012	June	27.37
Playa Baracoa	2012	June	27.468
Playa Baracoa	2012	June	27.468
Playa Baracoa	2012	June	27.37
Playa Baracoa	2012	June	27.468
Playa Baracoa	2012	June	27.468
Playa Baracoa	2012	June	27.468
Playa Baracoa	2012	June	27.468
Playa Baracoa	2012	June	27.37
Playa Baracoa	2012	June	27.37
Playa Baracoa	2012	June	27.37
Playa Baracoa	2012	June	27.37
Playa Baracoa	2012	June	27.37
Playa Baracoa	2012	June	27.468
Playa Baracoa	2012	June	27.468
Playa Baracoa	2012	June	27.567
Playa Baracoa	2012	June	27.764
Playa Baracoa	2012	June	27.665
Playa Baracoa	2012	June	27.665
Playa Baracoa	2012	June	27.665
Playa Baracoa	2012	June	27.665
Playa Baracoa	2012	June	27.665
Playa Baracoa	2012	June	27.665
Playa Baracoa	2012	June	27.665
Playa Baracoa	2012	June	27.665
Playa Baracoa	2012	June	27.567
Playa Baracoa	2012	June	27.567
Playa Baracoa	2012	June	27.567
Playa Baracoa	2012	June	27.567
Playa Baracoa	2012	June	27.567
Playa Baracoa	2012	June	27.567
Playa Baracoa	2012	June	27.567
Playa Baracoa	2012	June	27.567
Playa Baracoa	2012	June	27.665
Playa Baracoa	2012	June	27.567
Playa Baracoa	2012	June	27.567
Playa Baracoa	2012	June	27.567
Playa Baracoa	2012	June	27.665
Playa Baracoa	2012	June	27.665
Playa Baracoa	2012	June	27.764
Playa Baracoa	2012	June	27.764
Playa Baracoa	2012	June	27.764
Playa Baracoa	2012	June	27.862
Playa Baracoa	2012	June	27.862
Playa Baracoa	2012	June	27.764
Playa Baracoa	2012	June	27.665
Playa Baracoa	2012	June	27.665
Playa Baracoa	2012	June	27.567
Playa Baracoa	2012	June	27.665
Playa Baracoa	2012	June	27.665
Playa Baracoa	2012	June	27.567
Playa Baracoa	2012	June	27.567
Playa Baracoa	2012	June	27.567
Playa Baracoa	2012	June	27.567
Playa Baracoa	2012	June	27.567
Playa Baracoa	2012	June	27.567
Playa Baracoa	2012	June	27.567
Playa Baracoa	2012	June	27.567
Playa Baracoa	2012	June	27.567
Playa Baracoa	2012	June	27.567
Playa Baracoa	2012	June	27.567
Playa Baracoa	2012	June	27.567
Playa Baracoa	2012	June	27.567
Playa Baracoa	2012	June	27.567
Playa Baracoa	2012	June	27.567
Playa Baracoa	2012	June	27.567
Playa Baracoa	2012	June	27.764
Playa Baracoa	2012	June	27.764
Playa Baracoa	2012	June	27.764
Playa Baracoa	2012	June	27.764
Playa Baracoa	2012	June	27.862
Playa Baracoa	2012	June	27.862
Playa Baracoa	2012	June	27.862
Playa Baracoa	2012	June	27.862
Playa Baracoa	2012	June	27.764
Playa Baracoa	2012	June	27.764
Playa Baracoa	2012	June	27.862
Playa Baracoa	2012	June	27.862
Playa Baracoa	2012	June	27.862
Playa Baracoa	2012	June	27.862
Playa Baracoa	2012	June	27.862
Playa Baracoa	2012	June	27.862
Playa Baracoa	2012	June	27.862
Playa Baracoa	2012	June	27.862
Playa Baracoa	2012	June	27.862
Playa Baracoa	2012	June	27.764
Playa Baracoa	2012	June	27.862
Playa Baracoa	2012	June	27.862
Playa Baracoa	2012	June	27.862
Playa Baracoa	2012	June	27.862
Playa Baracoa	2012	June	27.961
Playa Baracoa	2012	June	27.862
Playa Baracoa	2012	June	27.961
Playa Baracoa	2012	June	27.961
Playa Baracoa	2012	June	27.961
Playa Baracoa	2012	June	27.961
Playa Baracoa	2012	June	27.961
Playa Baracoa	2012	June	28.06
Playa Baracoa	2012	June	28.06
Playa Baracoa	2012	June	28.06
Playa Baracoa	2012	June	28.06
Playa Baracoa	2012	June	28.06
Playa Baracoa	2012	June	28.06
Playa Baracoa	2012	June	28.159
Playa Baracoa	2012	June	28.06
Playa Baracoa	2012	June	28.06
Playa Baracoa	2012	June	28.06
Playa Baracoa	2012	June	28.06
Playa Baracoa	2012	June	28.159
Playa Baracoa	2012	June	28.159
Playa Baracoa	2012	June	28.06
Playa Baracoa	2012	June	28.06
Playa Baracoa	2012	June	28.06
Playa Baracoa	2012	June	28.06
Playa Baracoa	2012	June	28.06
Playa Baracoa	2012	June	28.06
Playa Baracoa	2012	June	28.06
Playa Baracoa	2012	June	28.06
Playa Baracoa	2012	June	28.06
Playa Baracoa	2012	June	28.06
Playa Baracoa	2012	June	27.961
Playa Baracoa	2012	June	27.961
Playa Baracoa	2012	June	28.06
Playa Baracoa	2012	June	28.06
Playa Baracoa	2012	June	28.06
Playa Baracoa	2012	June	28.06
Playa Baracoa	2012	June	28.06
Playa Baracoa	2012	June	28.06
Playa Baracoa	2012	June	28.06
Playa Baracoa	2012	June	28.06
Playa Baracoa	2012	June	28.159
Playa Baracoa	2012	June	28.159
Playa Baracoa	2012	June	28.159
Playa Baracoa	2012	June	28.159
Playa Baracoa	2012	June	28.159
Playa Baracoa	2012	June	28.159
Playa Baracoa	2012	June	28.159
Playa Baracoa	2012	June	28.159
Playa Baracoa	2012	June	28.258
Playa Baracoa	2012	June	28.258
Playa Baracoa	2012	June	28.258
Playa Baracoa	2012	June	28.258
Playa Baracoa	2012	June	28.159
Playa Baracoa	2012	June	28.159
Playa Baracoa	2012	June	28.159
Playa Baracoa	2012	June	28.06
Playa Baracoa	2012	June	27.961
Playa Baracoa	2012	June	28.06
Playa Baracoa	2012	June	28.06
Playa Baracoa	2012	June	28.159
Playa Baracoa	2012	June	28.159
Playa Baracoa	2012	June	28.159
Playa Baracoa	2012	June	28.159
Playa Baracoa	2012	June	28.159
Playa Baracoa	2012	June	28.258
Playa Baracoa	2012	June	28.258
Playa Baracoa	2012	June	28.357
Playa Baracoa	2012	June	28.357
Playa Baracoa	2012	June	28.357
Playa Baracoa	2012	June	28.258
Playa Baracoa	2012	June	28.258
Playa Baracoa	2012	June	28.258
Playa Baracoa	2012	June	28.258
Playa Baracoa	2012	June	28.258
Playa Baracoa	2012	June	28.258
Playa Baracoa	2012	June	28.258
Playa Baracoa	2012	June	28.258
Playa Baracoa	2012	June	28.258
Playa Baracoa	2012	June	28.258
Playa Baracoa	2012	June	28.258
Playa Baracoa	2012	June	28.258
Playa Baracoa	2012	June	28.258
Playa Baracoa	2012	June	28.258
Playa Baracoa	2012	June	28.258
Playa Baracoa	2012	June	28.159
Playa Baracoa	2012	June	28.159
Playa Baracoa	2012	June	28.258
Playa Baracoa	2012	June	28.258
Playa Baracoa	2012	June	28.159
Playa Baracoa	2012	June	28.258
Playa Baracoa	2012	June	28.258
Playa Baracoa	2012	June	28.258
Playa Baracoa	2012	June	28.258
Playa Baracoa	2012	June	28.258
Playa Baracoa	2012	June	28.258
Playa Baracoa	2012	June	28.357
Playa Baracoa	2012	June	28.357
Playa Baracoa	2012	June	28.258
Playa Baracoa	2012	June	28.159
Playa Baracoa	2012	June	28.159
Playa Baracoa	2012	June	28.159
Playa Baracoa	2012	June	28.159
Playa Baracoa	2012	June	28.159
Playa Baracoa	2012	June	28.159
Playa Baracoa	2012	June	28.06
Playa Baracoa	2012	June	28.159
Playa Baracoa	2012	June	28.159
Playa Baracoa	2012	June	28.159
Playa Baracoa	2012	June	28.06
Playa Baracoa	2012	June	28.06
Playa Baracoa	2012	June	28.159
Playa Baracoa	2012	June	28.159
Playa Baracoa	2012	June	28.06
Playa Baracoa	2012	June	28.06
Playa Baracoa	2012	June	28.06
Playa Baracoa	2012	June	28.06
Playa Baracoa	2012	June	28.159
Playa Baracoa	2012	June	28.159
Playa Baracoa	2012	June	28.258
Playa Baracoa	2012	June	28.258
Playa Baracoa	2012	June	28.258
Playa Baracoa	2012	June	28.258
Playa Baracoa	2012	June	28.258
Playa Baracoa	2012	June	28.357
Playa Baracoa	2012	June	28.357
Playa Baracoa	2012	June	28.357
Playa Baracoa	2012	June	28.357
Playa Baracoa	2012	June	28.357
Playa Baracoa	2012	June	28.357
Playa Baracoa	2012	June	28.357
Playa Baracoa	2012	June	28.258
Playa Baracoa	2012	June	28.258
Playa Baracoa	2012	June	28.357
Playa Baracoa	2012	June	28.357
Playa Baracoa	2012	June	28.357
Playa Baracoa	2012	June	28.456
Playa Baracoa	2012	June	28.456
Playa Baracoa	2012	June	28.456
Playa Baracoa	2012	June	28.456
Playa Baracoa	2012	June	28.456
Playa Baracoa	2012	June	28.357
Playa Baracoa	2012	June	28.456
Playa Baracoa	2012	June	28.357
Playa Baracoa	2012	June	28.357
Playa Baracoa	2012	June	28.357
Playa Baracoa	2012	June	28.357
Playa Baracoa	2012	June	28.357
Playa Baracoa	2012	June	28.357
Playa Baracoa	2012	June	28.258
Playa Baracoa	2012	June	28.357
Playa Baracoa	2012	June	28.357
Playa Baracoa	2012	June	28.456
Playa Baracoa	2012	June	28.456
Playa Baracoa	2012	June	28.456
Playa Baracoa	2012	June	28.456
Playa Baracoa	2012	June	28.456
Playa Baracoa	2012	June	28.357
Playa Baracoa	2012	June	28.357
Playa Baracoa	2012	June	28.258
Playa Baracoa	2012	June	28.258
Playa Baracoa	2012	June	28.357
Playa Baracoa	2012	June	28.357
Playa Baracoa	2012	June	28.357
Playa Baracoa	2012	June	28.357
Playa Baracoa	2012	June	28.357
Playa Baracoa	2012	June	28.357
Playa Baracoa	2012	June	28.258
Playa Baracoa	2012	June	28.159
Playa Baracoa	2012	June	28.159
Playa Baracoa	2012	June	28.159
Playa Baracoa	2012	June	28.159
Playa Baracoa	2012	June	28.258
Playa Baracoa	2012	June	28.357
Playa Baracoa	2012	June	28.357
Playa Baracoa	2012	June	28.456
Playa Baracoa	2012	June	28.456
Playa Baracoa	2012	June	28.456
Playa Baracoa	2012	June	28.357
Playa Baracoa	2012	June	28.357
Playa Baracoa	2012	June	28.357
Playa Baracoa	2012	June	28.357
Playa Baracoa	2012	June	28.258
Playa Baracoa	2012	June	28.258
Playa Baracoa	2012	June	28.258
Playa Baracoa	2012	June	28.258
Playa Baracoa	2012	June	28.159
Playa Baracoa	2012	June	28.258
Playa Baracoa	2012	June	28.258
Playa Baracoa	2012	June	28.258
Playa Baracoa	2012	June	28.456
Playa Baracoa	2012	June	28.456
Playa Baracoa	2012	June	28.456
Playa Baracoa	2012	June	28.456
Playa Baracoa	2012	June	28.159
Playa Baracoa	2012	June	28.06
Playa Baracoa	2012	June	27.961
Playa Baracoa	2012	June	27.961
Playa Baracoa	2012	June	27.961
Playa Baracoa	2012	June	27.961
Playa Baracoa	2012	June	27.961
Playa Baracoa	2012	June	27.961
Playa Baracoa	2012	June	27.961
Playa Baracoa	2012	June	27.961
Playa Baracoa	2012	June	27.961
Playa Baracoa	2012	June	27.961
Playa Baracoa	2012	June	27.961
Playa Baracoa	2012	June	27.862
Playa Baracoa	2012	June	27.862
Playa Baracoa	2012	June	27.862
Playa Baracoa	2012	June	27.862
Playa Baracoa	2012	June	27.862
Playa Baracoa	2012	June	27.764
Playa Baracoa	2012	June	27.764
Playa Baracoa	2012	June	27.764
Playa Baracoa	2012	June	27.764
Playa Baracoa	2012	June	27.764
Playa Baracoa	2012	June	27.764
Playa Baracoa	2012	June	27.764
Playa Baracoa	2012	June	27.862
Playa Baracoa	2012	June	27.961
Playa Baracoa	2012	June	27.961
Playa Baracoa	2012	June	28.06
Playa Baracoa	2012	June	27.764
Playa Baracoa	2012	June	27.862
Playa Baracoa	2012	June	27.862
Playa Baracoa	2012	June	27.961
Playa Baracoa	2012	June	27.961
Playa Baracoa	2012	June	28.06
Playa Baracoa	2012	June	28.06
Playa Baracoa	2012	June	28.06
Playa Baracoa	2012	June	28.06
Playa Baracoa	2012	June	28.06
Playa Baracoa	2012	June	28.06
Playa Baracoa	2012	June	28.06
Playa Baracoa	2012	June	28.06
Playa Baracoa	2012	June	28.159
Playa Baracoa	2012	June	28.159
Playa Baracoa	2012	June	28.258
Playa Baracoa	2012	June	28.258
Playa Baracoa	2012	June	28.258
Playa Baracoa	2012	June	28.357
Playa Baracoa	2012	June	28.357
Playa Baracoa	2012	June	28.258
Playa Baracoa	2012	June	28.258
Playa Baracoa	2012	June	28.159
Playa Baracoa	2012	June	28.06
Playa Baracoa	2012	June	28.159
Playa Baracoa	2012	June	28.159
Playa Baracoa	2012	June	28.159
Playa Baracoa	2012	June	28.258
Playa Baracoa	2012	June	28.06
Playa Baracoa	2012	June	27.961
Playa Baracoa	2012	June	27.862
Playa Baracoa	2012	June	27.862
Playa Baracoa	2012	June	27.862
Playa Baracoa	2012	June	27.961
Playa Baracoa	2012	June	27.862
Playa Baracoa	2012	June	27.862
Playa Baracoa	2012	June	27.961
Playa Baracoa	2012	June	27.961
Playa Baracoa	2012	June	27.961
Playa Baracoa	2012	June	27.961
Playa Baracoa	2012	June	27.961
Playa Baracoa	2012	June	27.862
Playa Baracoa	2012	June	27.961
Playa Baracoa	2012	June	27.862
Playa Baracoa	2012	June	27.862
Playa Baracoa	2012	June	27.862
Playa Baracoa	2012	June	27.862
Playa Baracoa	2012	June	27.862
Playa Baracoa	2012	June	27.862
Playa Baracoa	2012	June	27.961
Playa Baracoa	2012	June	27.961
Playa Baracoa	2012	June	27.961
Playa Baracoa	2012	June	27.961
Playa Baracoa	2012	June	27.961
Playa Baracoa	2012	June	27.961
Playa Baracoa	2012	June	27.961
Playa Baracoa	2012	June	27.961
Playa Baracoa	2012	June	28.06
Playa Baracoa	2012	June	28.06
Playa Baracoa	2012	June	28.06
Playa Baracoa	2012	June	28.159
Playa Baracoa	2012	June	28.159
Playa Baracoa	2012	June	28.258
Playa Baracoa	2012	June	28.258
Playa Baracoa	2012	June	28.258
Playa Baracoa	2012	June	28.258
Playa Baracoa	2012	June	28.06
Playa Baracoa	2012	June	28.06
Playa Baracoa	2012	June	27.961
Playa Baracoa	2012	June	27.862
Playa Baracoa	2012	June	27.862
Playa Baracoa	2012	June	27.862
Playa Baracoa	2012	June	27.961
Playa Baracoa	2012	June	27.862
Playa Baracoa	2012	June	27.862
Playa Baracoa	2012	June	27.961
Playa Baracoa	2012	June	27.862
Playa Baracoa	2012	June	27.961
Playa Baracoa	2012	June	27.961
Playa Baracoa	2012	June	27.961
Playa Baracoa	2012	June	27.961
Playa Baracoa	2012	June	27.862
Playa Baracoa	2012	June	27.862
Playa Baracoa	2012	June	27.764
Playa Baracoa	2012	June	27.764
Playa Baracoa	2012	June	27.764
Playa Baracoa	2012	June	27.764
Playa Baracoa	2012	June	27.764
Playa Baracoa	2012	June	27.764
Playa Baracoa	2012	June	27.764
Playa Baracoa	2012	June	27.764
Playa Baracoa	2012	June	27.764
Playa Baracoa	2012	June	27.764
Playa Baracoa	2012	June	27.764
Playa Baracoa	2012	June	27.764
Playa Baracoa	2012	June	27.764
Playa Baracoa	2012	June	27.764
Playa Baracoa	2012	June	27.764
Playa Baracoa	2012	June	27.764
Playa Baracoa	2012	June	27.862
Playa Baracoa	2012	June	27.862
Playa Baracoa	2012	June	27.862
Playa Baracoa	2012	June	27.862
Playa Baracoa	2012	June	27.862
Playa Baracoa	2012	June	27.961
Playa Baracoa	2012	June	27.961
Playa Baracoa	2012	June	27.961
Playa Baracoa	2012	June	28.06
Playa Baracoa	2012	June	28.159
Playa Baracoa	2012	June	28.258
Playa Baracoa	2012	June	28.258
Playa Baracoa	2012	June	28.258
Playa Baracoa	2012	June	28.258
Playa Baracoa	2012	June	28.357
Playa Baracoa	2012	June	28.258
Playa Baracoa	2012	June	28.06
Playa Baracoa	2012	June	27.961
Playa Baracoa	2012	June	27.961
Playa Baracoa	2012	June	27.961
Playa Baracoa	2012	June	27.961
Playa Baracoa	2012	June	27.862
Playa Baracoa	2012	June	27.665
Playa Baracoa	2012	June	27.665
Playa Baracoa	2012	June	27.665
Playa Baracoa	2012	June	27.764
Playa Baracoa	2012	June	27.764
Playa Baracoa	2012	June	27.764
Playa Baracoa	2012	June	27.665
Playa Baracoa	2012	June	27.764
Playa Baracoa	2012	June	27.567
Playa Baracoa	2012	June	27.567
Playa Baracoa	2012	June	27.567
Playa Baracoa	2012	June	27.567
Playa Baracoa	2012	June	27.567
Playa Baracoa	2012	June	27.567
Playa Baracoa	2012	June	27.665
Playa Baracoa	2012	June	27.764
Playa Baracoa	2012	June	27.764
Playa Baracoa	2012	June	27.764
Playa Baracoa	2012	June	27.764
Playa Baracoa	2012	June	27.764
Playa Baracoa	2012	June	27.862
Playa Baracoa	2012	June	27.862
Playa Baracoa	2012	June	27.862
Playa Baracoa	2012	June	27.862
Playa Baracoa	2012	June	27.862
Playa Baracoa	2012	June	27.862
Playa Baracoa	2012	June	27.862
Playa Baracoa	2012	June	27.862
Playa Baracoa	2012	June	27.862
Playa Baracoa	2012	June	27.961
Playa Baracoa	2012	June	27.961
Playa Baracoa	2012	June	27.961
Playa Baracoa	2012	June	27.961
Playa Baracoa	2012	June	27.961
Playa Baracoa	2012	June	27.961
Playa Baracoa	2012	June	27.961
Playa Baracoa	2012	June	27.961
Playa Baracoa	2012	June	27.961
Playa Baracoa	2012	June	28.06
Playa Baracoa	2012	June	28.06
Playa Baracoa	2012	June	28.159
Playa Baracoa	2012	June	28.258
Playa Baracoa	2012	June	28.258
Playa Baracoa	2012	June	28.258
Playa Baracoa	2012	June	28.258
Playa Baracoa	2012	June	28.357
Playa Baracoa	2012	June	28.258
Playa Baracoa	2012	June	28.258
Playa Baracoa	2012	June	28.159
Playa Baracoa	2012	June	27.961
Playa Baracoa	2012	June	27.961
Playa Baracoa	2012	June	27.961
Playa Baracoa	2012	June	27.961
Playa Baracoa	2012	June	27.961
Playa Baracoa	2012	June	27.961
Playa Baracoa	2012	June	27.862
Playa Baracoa	2012	June	27.862
Playa Baracoa	2012	June	27.862
Playa Baracoa	2012	June	27.862
Playa Baracoa	2012	June	27.764
Playa Baracoa	2012	June	27.862
Playa Baracoa	2012	June	27.862
Playa Baracoa	2012	June	27.862
Playa Baracoa	2012	June	27.961
Playa Baracoa	2012	June	27.961
Playa Baracoa	2012	June	27.862
Playa Baracoa	2012	June	27.764
Playa Baracoa	2012	June	27.862
Playa Baracoa	2012	June	27.862
Playa Baracoa	2012	June	27.862
Playa Baracoa	2012	June	27.862
Playa Baracoa	2012	June	27.862
Playa Baracoa	2012	June	27.862
Playa Baracoa	2012	June	27.961
Playa Baracoa	2012	June	28.06
Playa Baracoa	2012	June	27.961
Playa Baracoa	2012	June	27.961
Playa Baracoa	2012	June	27.862
Playa Baracoa	2012	June	27.764
Playa Baracoa	2012	June	27.862
Playa Baracoa	2012	June	27.862
Playa Baracoa	2012	June	27.862
Playa Baracoa	2012	June	27.862
Playa Baracoa	2012	June	27.862
Playa Baracoa	2012	June	27.862
Playa Baracoa	2012	June	27.862
Playa Baracoa	2012	June	27.961
Playa Baracoa	2012	June	27.961
Playa Baracoa	2012	June	27.961
Playa Baracoa	2012	June	27.961
Playa Baracoa	2012	June	27.961
Playa Baracoa	2012	June	27.961
Playa Baracoa	2012	June	27.862
Playa Baracoa	2012	June	27.961
Playa Baracoa	2012	June	27.961
Playa Baracoa	2012	June	27.862
Playa Baracoa	2012	June	27.862
Playa Baracoa	2012	June	27.862
Playa Baracoa	2012	June	27.862
Playa Baracoa	2012	June	27.961
Playa Baracoa	2012	June	27.862
Playa Baracoa	2012	June	27.862
Playa Baracoa	2012	June	27.862
Playa Baracoa	2012	June	27.862
Playa Baracoa	2012	June	27.764
Playa Baracoa	2012	June	27.764
Playa Baracoa	2012	June	27.764
Playa Baracoa	2012	June	27.764
Playa Baracoa	2012	June	27.764
Playa Baracoa	2012	June	27.862
Playa Baracoa	2012	June	27.862
Playa Baracoa	2012	June	27.961
Playa Baracoa	2012	June	27.961
Playa Baracoa	2012	June	27.961
Playa Baracoa	2012	June	27.961
Playa Baracoa	2012	June	28.06
Playa Baracoa	2012	June	28.06
Playa Baracoa	2012	June	27.961
Playa Baracoa	2012	June	27.764
Playa Baracoa	2012	June	27.764
Playa Baracoa	2012	June	27.862
Playa Baracoa	2012	June	27.862
Playa Baracoa	2012	June	27.862
Playa Baracoa	2012	June	27.764
Playa Baracoa	2012	June	27.764
Playa Baracoa	2012	June	27.862
Playa Baracoa	2012	June	27.862
Playa Baracoa	2012	June	27.961
Playa Baracoa	2012	June	27.961
Playa Baracoa	2012	June	27.961
Playa Baracoa	2012	June	27.961
Playa Baracoa	2012	June	28.06
Playa Baracoa	2012	June	27.961
Playa Baracoa	2012	June	28.06
Playa Baracoa	2012	June	28.06
Playa Baracoa	2012	June	28.06
Playa Baracoa	2012	June	28.06
Playa Baracoa	2012	June	28.06
Playa Baracoa	2012	June	28.06
Playa Baracoa	2012	June	28.06
Playa Baracoa	2012	June	28.06
Playa Baracoa	2012	June	27.961
Playa Baracoa	2012	June	27.862
Playa Baracoa	2012	June	27.764
Playa Baracoa	2012	June	27.764
Playa Baracoa	2012	June	27.764
Playa Baracoa	2012	June	27.862
Playa Baracoa	2012	June	27.665
Playa Baracoa	2012	June	27.567
Playa Baracoa	2012	June	27.567
Playa Baracoa	2012	June	27.468
Playa Baracoa	2012	June	27.468
Playa Baracoa	2012	June	27.468
Playa Baracoa	2012	June	27.468
Playa Baracoa	2012	June	27.468
Playa Baracoa	2012	June	27.468
Playa Baracoa	2012	June	27.468
Playa Baracoa	2012	June	27.468
Playa Baracoa	2012	June	27.567
Playa Baracoa	2012	June	27.665
Playa Baracoa	2012	June	27.764
Playa Baracoa	2012	June	27.764
Playa Baracoa	2012	June	27.665
Playa Baracoa	2012	June	27.567
Playa Baracoa	2012	June	27.567
Playa Baracoa	2012	June	27.665
Playa Baracoa	2012	June	27.665
Playa Baracoa	2012	June	27.665
Playa Baracoa	2012	June	27.764
Playa Baracoa	2012	June	27.764
Playa Baracoa	2012	June	27.764
Playa Baracoa	2012	June	27.665
Playa Baracoa	2012	June	27.567
Playa Baracoa	2012	June	27.567
Playa Baracoa	2012	June	27.665
Playa Baracoa	2012	June	27.665
Playa Baracoa	2012	June	27.665
Playa Baracoa	2012	June	27.665
Playa Baracoa	2012	June	27.665
Playa Baracoa	2012	June	27.665
Playa Baracoa	2012	June	27.665
Playa Baracoa	2012	June	27.665
Playa Baracoa	2012	June	27.764
Playa Baracoa	2012	June	27.665
Playa Baracoa	2012	June	27.665
Playa Baracoa	2012	June	27.665
Playa Baracoa	2012	June	27.567
Playa Baracoa	2012	June	27.567
Playa Baracoa	2012	June	27.567
Playa Baracoa	2012	June	27.567
Playa Baracoa	2012	June	27.567
Playa Baracoa	2012	June	27.567
Playa Baracoa	2012	June	27.468
Playa Baracoa	2012	June	27.468
Playa Baracoa	2012	June	27.468
Playa Baracoa	2012	June	27.468
Playa Baracoa	2012	June	27.468
Playa Baracoa	2012	June	27.468
Playa Baracoa	2012	June	27.468
Playa Baracoa	2012	June	27.37
Playa Baracoa	2012	June	27.37
Playa Baracoa	2012	June	27.37
Playa Baracoa	2012	June	27.37
Playa Baracoa	2012	June	27.37
Playa Baracoa	2012	June	27.37
Playa Baracoa	2012	June	27.37
Playa Baracoa	2012	June	27.468
Playa Baracoa	2012	June	27.468
Playa Baracoa	2012	June	27.468
Playa Baracoa	2012	June	27.468
Playa Baracoa	2012	June	27.468
Playa Baracoa	2012	June	27.468
Playa Baracoa	2012	June	27.468
Playa Baracoa	2012	June	27.468
Playa Baracoa	2012	June	27.468
Playa Baracoa	2012	June	27.468
Playa Baracoa	2012	June	27.468
Playa Baracoa	2012	June	27.468
Playa Baracoa	2012	June	27.468
Playa Baracoa	2012	June	27.468
Playa Baracoa	2012	June	27.468
Playa Baracoa	2012	June	27.468
Playa Baracoa	2012	June	27.468
Playa Baracoa	2012	June	27.272
Playa Baracoa	2012	June	27.272
Playa Baracoa	2012	June	27.37
Playa Baracoa	2012	June	27.272
Playa Baracoa	2012	June	27.272
Playa Baracoa	2012	June	27.272
Playa Baracoa	2012	June	27.272
Playa Baracoa	2012	June	27.272
Playa Baracoa	2012	June	27.272
Playa Baracoa	2012	June	27.173
Playa Baracoa	2012	June	27.272
Playa Baracoa	2012	June	27.272
Playa Baracoa	2012	June	27.272
Playa Baracoa	2012	June	27.272
Playa Baracoa	2012	June	27.272
Playa Baracoa	2012	June	27.272
Playa Baracoa	2012	June	27.272
Playa Baracoa	2012	June	27.272
Playa Baracoa	2012	June	27.272
Playa Baracoa	2012	June	27.173
Playa Baracoa	2012	June	27.173
Playa Baracoa	2012	June	27.173
Playa Baracoa	2012	June	27.173
Playa Baracoa	2012	June	27.075
Playa Baracoa	2012	June	27.075
Playa Baracoa	2012	June	27.173
Playa Baracoa	2012	June	27.075
Playa Baracoa	2012	June	27.075
Playa Baracoa	2012	June	27.075
Playa Baracoa	2012	June	27.075
Playa Baracoa	2012	June	27.075
Playa Baracoa	2012	June	27.075
Playa Baracoa	2012	June	27.075
Playa Baracoa	2012	June	27.075
Playa Baracoa	2012	June	27.075
Playa Baracoa	2012	June	27.075
Playa Baracoa	2012	June	26.977
Playa Baracoa	2012	June	27.075
Playa Baracoa	2012	June	27.075
Playa Baracoa	2012	June	27.075
Playa Baracoa	2012	June	27.075
Playa Baracoa	2012	June	27.075
Playa Baracoa	2012	June	27.075
Playa Baracoa	2012	June	27.075
Playa Baracoa	2012	June	27.075
Playa Baracoa	2012	June	27.075
Playa Baracoa	2012	June	27.075
Playa Baracoa	2012	June	27.075
Playa Baracoa	2012	June	27.075
Playa Baracoa	2012	June	27.075
Playa Baracoa	2012	June	27.173
Playa Baracoa	2012	June	27.173
Playa Baracoa	2012	June	27.173
Playa Baracoa	2012	June	27.173
Playa Baracoa	2012	June	27.173
Playa Baracoa	2012	June	27.173
Playa Baracoa	2012	June	27.173
Playa Baracoa	2012	June	27.173
Playa Baracoa	2012	June	27.173
Playa Baracoa	2012	June	27.173
Playa Baracoa	2012	June	27.173
Playa Baracoa	2012	June	27.173
Playa Baracoa	2012	June	27.173
Playa Baracoa	2012	June	27.173
Playa Baracoa	2012	June	27.173
Playa Baracoa	2012	June	27.173
Playa Baracoa	2012	June	27.075
Playa Baracoa	2012	June	27.075
Playa Baracoa	2012	June	27.075
Playa Baracoa	2012	June	27.075
Playa Baracoa	2012	June	27.075
Playa Baracoa	2012	June	27.075
Playa Baracoa	2012	June	27.075
Playa Baracoa	2012	June	27.075
Playa Baracoa	2012	June	27.075
Playa Baracoa	2012	June	27.075
Playa Baracoa	2012	June	27.075
Playa Baracoa	2012	June	27.075
Playa Baracoa	2012	June	27.075
Playa Baracoa	2012	June	27.075
Playa Baracoa	2012	June	27.075
Playa Baracoa	2012	June	27.075
Playa Baracoa	2012	June	27.075
Playa Baracoa	2012	June	27.075
Playa Baracoa	2012	June	27.075
Playa Baracoa	2012	June	27.075
Playa Baracoa	2012	June	27.075
Playa Baracoa	2012	June	27.075
Playa Baracoa	2012	June	27.075
Playa Baracoa	2012	June	27.075
Playa Baracoa	2012	June	27.075
Playa Baracoa	2012	June	27.075
Playa Baracoa	2012	June	27.075
Playa Baracoa	2012	June	27.075
Playa Baracoa	2012	June	27.075
Playa Baracoa	2012	June	27.075
Playa Baracoa	2012	June	27.075
Playa Baracoa	2012	June	27.075
Playa Baracoa	2012	June	27.075
Playa Baracoa	2012	June	27.075
Playa Baracoa	2012	June	27.075
Playa Baracoa	2012	June	27.075
Playa Baracoa	2012	June	27.075
Playa Baracoa	2012	June	27.075
Playa Baracoa	2012	June	27.075
Playa Baracoa	2012	June	27.075
Playa Baracoa	2012	June	27.075
Playa Baracoa	2012	June	27.173
Playa Baracoa	2012	June	27.173
Playa Baracoa	2012	June	27.173
Playa Baracoa	2012	June	27.173
Playa Baracoa	2012	June	27.173
Playa Baracoa	2012	June	27.173
Playa Baracoa	2012	June	27.173
Playa Baracoa	2012	June	27.173
Playa Baracoa	2012	June	27.173
Playa Baracoa	2012	June	27.173
Playa Baracoa	2012	June	27.173
Playa Baracoa	2012	June	27.173
Playa Baracoa	2012	June	27.173
Playa Baracoa	2012	June	27.173
Playa Baracoa	2012	June	27.173
Playa Baracoa	2012	June	27.173
Playa Baracoa	2012	June	27.173
Playa Baracoa	2012	June	27.173
Playa Baracoa	2012	June	27.173
Playa Baracoa	2012	June	27.173
Playa Baracoa	2012	June	27.075
Playa Baracoa	2012	June	27.075
Playa Baracoa	2012	June	26.977
Playa Baracoa	2012	June	26.977
Playa Baracoa	2012	June	26.977
Playa Baracoa	2012	June	26.977
Playa Baracoa	2012	June	27.075
Playa Baracoa	2012	June	27.075
Playa Baracoa	2012	June	27.075
Playa Baracoa	2012	June	27.075
Playa Baracoa	2012	June	27.075
Playa Baracoa	2012	June	27.075
Playa Baracoa	2012	June	27.075
Playa Baracoa	2012	June	27.075
Playa Baracoa	2012	June	27.075
Playa Baracoa	2012	June	27.075
Playa Baracoa	2012	June	27.173
Playa Baracoa	2012	June	27.075
Playa Baracoa	2012	June	27.173
Playa Baracoa	2012	June	27.173
Playa Baracoa	2012	June	27.173
Playa Baracoa	2012	June	27.173
Playa Baracoa	2012	June	27.173
Playa Baracoa	2012	June	27.173
Playa Baracoa	2012	June	27.173
Playa Baracoa	2012	June	27.173
Playa Baracoa	2012	June	27.173
Playa Baracoa	2012	June	27.173
Playa Baracoa	2012	June	27.173
Playa Baracoa	2012	June	27.173
Playa Baracoa	2012	June	27.173
Playa Baracoa	2012	June	27.173
Playa Baracoa	2012	June	27.173
Playa Baracoa	2012	June	27.173
Playa Baracoa	2012	June	27.173
Playa Baracoa	2012	June	27.173
Playa Baracoa	2012	June	27.075
Playa Baracoa	2012	June	27.173
Playa Baracoa	2012	June	27.173
Playa Baracoa	2012	June	27.173
Playa Baracoa	2012	June	27.173
Playa Baracoa	2012	June	27.272
Playa Baracoa	2012	June	27.272
Playa Baracoa	2012	June	27.173
Playa Baracoa	2012	June	27.173
Playa Baracoa	2012	June	27.173
Playa Baracoa	2012	June	27.075
Playa Baracoa	2012	June	27.075
Playa Baracoa	2012	June	27.075
Playa Baracoa	2012	June	27.075
Playa Baracoa	2012	June	26.977
Playa Baracoa	2012	June	26.977
Playa Baracoa	2012	June	26.977
Playa Baracoa	2012	June	26.977
Playa Baracoa	2012	June	26.977
Playa Baracoa	2012	June	26.977
Playa Baracoa	2012	June	27.075
Playa Baracoa	2012	June	27.075
Playa Baracoa	2012	June	27.075
Playa Baracoa	2012	June	27.075
Playa Baracoa	2012	June	27.075
Playa Baracoa	2012	June	27.075
Playa Baracoa	2012	June	27.075
Playa Baracoa	2012	June	27.075
Playa Baracoa	2012	June	27.075
Playa Baracoa	2012	June	27.173
Playa Baracoa	2012	June	27.173
Playa Baracoa	2012	June	27.173
Playa Baracoa	2012	June	27.173
Playa Baracoa	2012	June	27.173
Playa Baracoa	2012	June	27.173
Playa Baracoa	2012	June	27.075
Playa Baracoa	2012	June	27.173
Playa Baracoa	2012	June	27.173
Playa Baracoa	2012	June	27.173
Playa Baracoa	2012	June	27.173
Playa Baracoa	2012	June	27.173
Playa Baracoa	2012	June	27.075
Playa Baracoa	2012	June	27.075
Playa Baracoa	2012	June	26.977
Playa Baracoa	2012	June	26.977
Playa Baracoa	2012	June	27.075
Playa Baracoa	2012	June	27.075
Playa Baracoa	2012	June	27.075
Playa Baracoa	2012	June	27.075
Playa Baracoa	2012	June	26.977
Playa Baracoa	2012	June	26.977
Playa Baracoa	2012	June	26.977
Playa Baracoa	2012	June	26.977
Playa Baracoa	2012	June	26.977
Playa Baracoa	2012	June	26.879
Playa Baracoa	2012	June	26.879
Playa Baracoa	2012	June	26.879
Playa Baracoa	2012	June	26.879
Playa Baracoa	2012	June	26.879
Playa Baracoa	2012	June	26.879
Playa Baracoa	2012	June	26.879
Playa Baracoa	2012	June	26.879
Playa Baracoa	2012	June	26.879
Playa Baracoa	2012	June	26.879
Playa Baracoa	2012	June	26.977
Playa Baracoa	2012	June	26.977
Playa Baracoa	2012	June	26.977
Playa Baracoa	2012	June	26.977
Playa Baracoa	2012	June	26.977
Playa Baracoa	2012	June	26.977
Playa Baracoa	2012	June	27.075
Playa Baracoa	2012	June	27.075
Playa Baracoa	2012	June	27.075
Playa Baracoa	2012	June	27.075
Playa Baracoa	2012	June	27.075
Playa Baracoa	2012	June	27.075
Playa Baracoa	2012	June	27.075
Playa Baracoa	2012	June	27.075
Playa Baracoa	2012	June	27.075
Playa Baracoa	2012	June	27.075
Playa Baracoa	2012	June	27.075
Playa Baracoa	2012	June	27.075
Playa Baracoa	2012	June	27.075
Playa Baracoa	2012	June	27.075
Playa Baracoa	2012	June	27.075
Playa Baracoa	2012	June	27.075
Playa Baracoa	2012	June	27.075
Playa Baracoa	2012	June	27.075
Playa Baracoa	2012	June	27.075
Playa Baracoa	2012	June	27.075
Playa Baracoa	2012	June	27.075
Playa Baracoa	2012	June	27.075
Playa Baracoa	2012	June	27.075
Playa Baracoa	2012	June	27.075
Playa Baracoa	2012	June	27.075
Playa Baracoa	2012	June	27.075
Playa Baracoa	2012	June	27.075
Playa Baracoa	2012	June	27.173
Playa Baracoa	2012	June	27.173
Playa Baracoa	2012	June	27.173
Playa Baracoa	2012	June	27.173
Playa Baracoa	2012	June	27.173
Playa Baracoa	2012	June	27.173
Playa Baracoa	2012	June	27.173
Playa Baracoa	2012	June	27.173
Playa Baracoa	2012	June	27.173
Playa Baracoa	2012	June	27.173
Playa Baracoa	2012	June	27.173
Playa Baracoa	2012	June	27.173
Playa Baracoa	2012	June	27.272
Playa Baracoa	2012	June	27.272
Playa Baracoa	2012	June	27.272
Playa Baracoa	2012	June	27.272
Playa Baracoa	2012	June	27.272
Playa Baracoa	2012	June	27.272
Playa Baracoa	2012	June	27.272
Playa Baracoa	2012	June	27.37
Playa Baracoa	2012	June	27.37
Playa Baracoa	2012	June	27.37
Playa Baracoa	2012	June	27.37
Playa Baracoa	2012	June	27.37
Playa Baracoa	2012	June	27.37
Playa Baracoa	2012	June	27.37
Playa Baracoa	2012	June	27.37
Playa Baracoa	2012	June	27.37
Playa Baracoa	2012	June	27.37
Playa Baracoa	2012	June	27.37
Playa Baracoa	2012	June	27.468
Playa Baracoa	2012	June	27.468
Playa Baracoa	2012	June	27.468
Playa Baracoa	2012	June	27.567
Playa Baracoa	2012	June	27.567
Playa Baracoa	2012	June	27.567
Playa Baracoa	2012	June	27.567
Playa Baracoa	2012	June	27.567
Playa Baracoa	2012	June	27.567
Playa Baracoa	2012	June	27.567
Playa Baracoa	2012	June	27.567
Playa Baracoa	2012	June	27.567
Playa Baracoa	2012	June	27.567
Playa Baracoa	2012	June	27.567
Playa Baracoa	2012	June	27.567
Playa Baracoa	2012	June	27.567
Playa Baracoa	2012	June	27.567
Playa Baracoa	2012	June	27.567
Playa Baracoa	2012	June	27.567
Playa Baracoa	2012	June	27.567
Playa Baracoa	2012	June	27.567
Playa Baracoa	2012	June	27.567
Playa Baracoa	2012	June	27.567
Playa Baracoa	2012	June	27.567
Playa Baracoa	2012	June	27.665
Playa Baracoa	2012	June	27.567
Playa Baracoa	2012	June	27.567
Playa Baracoa	2012	June	27.567
Playa Baracoa	2012	June	27.665
Playa Baracoa	2012	June	27.665
Playa Baracoa	2012	June	27.665
Playa Baracoa	2012	June	27.665
Playa Baracoa	2012	June	27.665
Playa Baracoa	2012	June	27.665
Playa Baracoa	2012	June	27.665
Playa Baracoa	2012	June	27.764
Playa Baracoa	2012	June	27.764
Playa Baracoa	2012	June	27.764
Playa Baracoa	2012	June	27.764
Playa Baracoa	2012	June	27.764
Playa Baracoa	2012	June	27.764
Playa Baracoa	2012	June	27.764
Playa Baracoa	2012	June	27.764
Playa Baracoa	2012	June	27.764
Playa Baracoa	2012	June	27.764
Playa Baracoa	2012	June	27.764
Playa Baracoa	2012	June	27.764
Playa Baracoa	2012	June	27.764
Playa Baracoa	2012	June	27.764
Playa Baracoa	2012	June	27.764
Playa Baracoa	2012	June	27.764
Playa Baracoa	2012	June	27.764
Playa Baracoa	2012	June	27.862
Playa Baracoa	2012	June	27.862
Playa Baracoa	2012	June	27.961
Playa Baracoa	2012	June	27.961
Playa Baracoa	2012	June	27.961
Playa Baracoa	2012	June	27.961
Playa Baracoa	2012	June	27.961
Playa Baracoa	2012	June	27.961
Playa Baracoa	2012	June	28.06
Playa Baracoa	2012	June	27.961
Playa Baracoa	2012	June	27.961
Playa Baracoa	2012	June	27.961
Playa Baracoa	2012	June	27.961
Playa Baracoa	2012	June	28.06
Playa Baracoa	2012	June	28.06
Playa Baracoa	2012	June	28.06
Playa Baracoa	2012	June	28.06
Playa Baracoa	2012	June	28.06
Playa Baracoa	2012	June	28.06
Playa Baracoa	2012	June	28.159
Playa Baracoa	2012	June	28.159
Playa Baracoa	2012	June	28.159
Playa Baracoa	2012	June	28.159
Playa Baracoa	2012	June	28.159
Playa Baracoa	2012	June	28.159
Playa Baracoa	2012	June	28.159
Playa Baracoa	2012	June	28.159
Playa Baracoa	2012	June	28.159
Playa Baracoa	2012	June	28.159
Playa Baracoa	2012	June	28.258
Playa Baracoa	2012	June	28.258
Playa Baracoa	2012	June	28.258
Playa Baracoa	2012	June	28.258
Playa Baracoa	2012	June	28.258
Playa Baracoa	2012	June	28.159
Playa Baracoa	2012	June	28.159
Playa Baracoa	2012	June	28.159
Playa Baracoa	2012	June	28.159
Playa Baracoa	2012	June	28.159
Playa Baracoa	2012	June	28.159
Playa Baracoa	2012	June	28.159
Playa Baracoa	2012	June	28.159
Playa Baracoa	2012	June	28.159
Playa Baracoa	2012	June	28.258
Playa Baracoa	2012	June	28.258
Playa Baracoa	2012	June	28.357
Playa Baracoa	2012	June	28.357
Playa Baracoa	2012	June	28.357
Playa Baracoa	2012	June	28.357
Playa Baracoa	2012	June	28.357
Playa Baracoa	2012	June	28.357
Playa Baracoa	2012	June	28.456
Playa Baracoa	2012	June	28.456
Playa Baracoa	2012	June	28.456
Playa Baracoa	2012	June	28.456
Playa Baracoa	2012	June	28.456
Playa Baracoa	2012	June	28.456
Playa Baracoa	2012	June	28.456
Playa Baracoa	2012	June	28.456
Playa Baracoa	2012	June	28.456
Playa Baracoa	2012	June	28.456
Playa Baracoa	2012	June	28.456
Playa Baracoa	2012	June	28.456
Playa Baracoa	2012	June	28.456
Playa Baracoa	2012	June	28.456
Playa Baracoa	2012	June	28.456
Playa Baracoa	2012	June	28.456
Playa Baracoa	2012	June	28.456
Playa Baracoa	2012	June	28.357
Playa Baracoa	2012	June	28.357
Playa Baracoa	2012	June	28.357
Playa Baracoa	2012	June	28.357
Playa Baracoa	2012	June	28.357
Playa Baracoa	2012	June	28.357
Playa Baracoa	2012	June	28.357
Playa Baracoa	2012	June	28.357
Playa Baracoa	2012	June	28.357
Playa Baracoa	2012	June	28.357
Playa Baracoa	2012	June	28.357
Playa Baracoa	2012	June	28.357
Playa Baracoa	2012	June	28.357
Playa Baracoa	2012	June	28.357
Playa Baracoa	2012	June	28.357
Playa Baracoa	2012	June	28.357
Playa Baracoa	2012	June	28.357
Playa Baracoa	2012	June	28.357
Playa Baracoa	2012	June	28.357
Playa Baracoa	2012	June	28.357
Playa Baracoa	2012	June	28.357
Playa Baracoa	2012	June	28.456
Playa Baracoa	2012	June	28.456
Playa Baracoa	2012	June	28.456
Playa Baracoa	2012	June	28.456
Playa Baracoa	2012	June	28.456
Playa Baracoa	2012	June	28.456
Playa Baracoa	2012	June	28.555
Playa Baracoa	2012	June	28.555
Playa Baracoa	2012	June	28.555
Playa Baracoa	2012	June	28.555
Playa Baracoa	2012	June	28.555
Playa Baracoa	2012	June	28.555
Playa Baracoa	2012	June	28.555
Playa Baracoa	2012	June	28.555
Playa Baracoa	2012	June	28.555
Playa Baracoa	2012	June	28.555
Playa Baracoa	2012	June	28.555
Playa Baracoa	2012	June	28.555
Playa Baracoa	2012	June	28.555
Playa Baracoa	2012	June	28.555
Playa Baracoa	2012	June	28.555
Playa Baracoa	2012	June	28.555
Playa Baracoa	2012	June	28.555
Playa Baracoa	2012	June	28.456
Playa Baracoa	2012	June	28.555
Playa Baracoa	2012	June	28.555
Playa Baracoa	2012	June	28.655
Playa Baracoa	2012	June	28.754
Playa Baracoa	2012	June	28.754
Playa Baracoa	2012	June	28.754
Playa Baracoa	2012	June	28.754
Playa Baracoa	2012	June	28.754
Playa Baracoa	2012	June	28.754
Playa Baracoa	2012	June	28.754
Playa Baracoa	2012	June	28.655
Playa Baracoa	2012	June	28.754
Playa Baracoa	2012	June	28.655
Playa Baracoa	2012	June	28.555
Playa Baracoa	2012	June	28.655
Playa Baracoa	2012	June	28.555
Playa Baracoa	2012	June	28.555
Playa Baracoa	2012	June	28.555
Playa Baracoa	2012	June	28.555
Playa Baracoa	2012	June	28.555
Playa Baracoa	2012	June	28.555
Playa Baracoa	2012	June	28.655
Playa Baracoa	2012	June	28.655
Playa Baracoa	2012	June	28.655
Playa Baracoa	2012	June	28.655
Playa Baracoa	2012	June	28.655
Playa Baracoa	2012	June	28.655
Playa Baracoa	2012	June	28.655
Playa Baracoa	2012	June	28.655
Playa Baracoa	2012	June	28.655
Playa Baracoa	2012	June	28.655
Playa Baracoa	2012	June	28.655
Playa Baracoa	2012	June	28.655
Playa Baracoa	2012	June	28.754
Playa Baracoa	2012	June	28.754
Playa Baracoa	2012	June	28.754
Playa Baracoa	2012	June	28.754
Playa Baracoa	2012	June	28.754
Playa Baracoa	2012	June	28.853
Playa Baracoa	2012	June	28.853
Playa Baracoa	2012	June	28.853
Playa Baracoa	2012	June	28.853
Playa Baracoa	2012	June	28.853
Playa Baracoa	2012	June	28.853
Playa Baracoa	2012	June	28.853
Playa Baracoa	2012	June	28.853
Playa Baracoa	2012	June	28.853
Playa Baracoa	2012	June	28.853
Playa Baracoa	2012	June	28.853
Playa Baracoa	2012	June	28.953
Playa Baracoa	2012	June	28.853
Playa Baracoa	2012	June	28.853
Playa Baracoa	2012	June	28.853
Playa Baracoa	2012	June	28.953
Playa Baracoa	2012	June	28.953
Playa Baracoa	2012	June	28.953
Playa Baracoa	2012	June	28.953
Playa Baracoa	2012	June	28.953
Playa Baracoa	2012	June	28.953
Playa Baracoa	2012	June	28.953
Playa Baracoa	2012	June	28.953
Playa Baracoa	2012	June	28.953
Playa Baracoa	2012	June	28.953
Playa Baracoa	2012	June	28.853
Playa Baracoa	2012	June	28.953
Playa Baracoa	2012	June	28.853
Playa Baracoa	2012	June	28.953
Playa Baracoa	2012	June	28.953
Playa Baracoa	2012	June	28.953
Playa Baracoa	2012	June	28.953
Playa Baracoa	2012	June	28.953
Playa Baracoa	2012	June	28.953
Playa Baracoa	2012	June	28.953
Playa Baracoa	2012	June	28.953
Playa Baracoa	2012	June	28.953
Playa Baracoa	2012	June	28.853
Playa Baracoa	2012	June	28.853
Playa Baracoa	2012	June	28.853
Playa Baracoa	2012	June	28.853
Playa Baracoa	2012	June	28.853
Playa Baracoa	2012	June	28.754
Playa Baracoa	2012	June	28.754
Playa Baracoa	2012	June	28.754
Playa Baracoa	2012	June	28.754
Playa Baracoa	2012	June	28.754
Playa Baracoa	2012	June	28.754
Playa Baracoa	2012	June	28.754
Playa Baracoa	2012	June	28.754
Playa Baracoa	2012	June	28.754
Playa Baracoa	2012	June	28.754
Playa Baracoa	2012	June	28.754
Playa Baracoa	2012	June	28.754
Playa Baracoa	2012	June	28.754
Playa Baracoa	2012	June	28.754
Playa Baracoa	2012	June	28.754
Playa Baracoa	2012	June	28.754
Playa Baracoa	2012	June	28.754
Playa Baracoa	2012	June	28.754
Playa Baracoa	2012	June	28.853
Playa Baracoa	2012	June	28.754
Playa Baracoa	2012	June	28.754
Playa Baracoa	2012	June	28.853
Playa Baracoa	2012	June	28.853
Playa Baracoa	2012	June	28.853
Playa Baracoa	2012	June	28.754
Playa Baracoa	2012	June	28.754
Playa Baracoa	2012	June	28.754
Playa Baracoa	2012	June	28.754
Playa Baracoa	2012	June	28.754
Playa Baracoa	2012	June	28.655
Playa Baracoa	2012	June	28.655
Playa Baracoa	2012	June	28.655
Playa Baracoa	2012	June	28.655
Playa Baracoa	2012	June	28.754
Playa Baracoa	2012	June	28.754
Playa Baracoa	2012	June	28.754
Playa Baracoa	2012	June	28.754
Playa Baracoa	2012	June	28.754
Playa Baracoa	2012	June	28.754
Playa Baracoa	2012	June	28.754
Playa Baracoa	2012	June	28.754
Playa Baracoa	2012	June	28.853
Playa Baracoa	2012	June	28.754
Playa Baracoa	2012	June	28.655
Playa Baracoa	2012	June	28.655
Playa Baracoa	2012	June	28.754
Playa Baracoa	2012	June	28.754
Playa Baracoa	2012	June	28.754
Playa Baracoa	2012	June	28.754
Playa Baracoa	2012	June	28.754
Playa Baracoa	2012	June	28.655
Playa Baracoa	2012	June	28.655
Playa Baracoa	2012	June	28.655
Playa Baracoa	2012	June	28.655
Playa Baracoa	2012	June	28.655
Playa Baracoa	2012	June	28.655
Playa Baracoa	2012	June	28.655
Playa Baracoa	2012	June	28.655
Playa Baracoa	2012	June	28.655
Playa Baracoa	2012	June	28.655
Playa Baracoa	2012	June	28.754
Playa Baracoa	2012	June	28.655
Playa Baracoa	2012	June	28.655
Playa Baracoa	2012	June	28.655
Playa Baracoa	2012	June	28.655
Playa Baracoa	2012	June	28.655
Playa Baracoa	2012	July	28.655
Playa Baracoa	2012	July	28.655
Playa Baracoa	2012	July	28.655
Playa Baracoa	2012	July	28.655
Playa Baracoa	2012	July	28.655
Playa Baracoa	2012	July	28.655
Playa Baracoa	2012	July	28.655
Playa Baracoa	2012	July	28.655
Playa Baracoa	2012	July	28.655
Playa Baracoa	2012	July	28.655
Playa Baracoa	2012	July	28.655
Playa Baracoa	2012	July	28.655
Playa Baracoa	2012	July	28.655
Playa Baracoa	2012	July	28.655
Playa Baracoa	2012	July	28.655
Playa Baracoa	2012	July	28.655
Playa Baracoa	2012	July	28.655
Playa Baracoa	2012	July	28.655
Playa Baracoa	2012	July	28.655
Playa Baracoa	2012	July	28.655
Playa Baracoa	2012	July	28.655
Playa Baracoa	2012	July	28.655
Playa Baracoa	2012	July	28.754
Playa Baracoa	2012	July	28.754
Playa Baracoa	2012	July	28.655
Playa Baracoa	2012	July	28.655
Playa Baracoa	2012	July	28.655
Playa Baracoa	2012	July	28.655
Playa Baracoa	2012	July	28.754
Playa Baracoa	2012	July	28.754
Playa Baracoa	2012	July	28.754
Playa Baracoa	2012	July	28.754
Playa Baracoa	2012	July	28.754
Playa Baracoa	2012	July	28.754
Playa Baracoa	2012	July	28.754
Playa Baracoa	2012	July	28.754
Playa Baracoa	2012	July	28.655
Playa Baracoa	2012	July	28.655
Playa Baracoa	2012	July	28.655
Playa Baracoa	2012	July	28.655
Playa Baracoa	2012	July	28.655
Playa Baracoa	2012	July	28.655
Playa Baracoa	2012	July	28.655
Playa Baracoa	2012	July	28.655
Playa Baracoa	2012	July	28.655
Playa Baracoa	2012	July	28.655
Playa Baracoa	2012	July	28.655
Playa Baracoa	2012	July	28.655
Playa Baracoa	2012	July	28.655
Playa Baracoa	2012	July	28.655
Playa Baracoa	2012	July	28.655
Playa Baracoa	2012	July	28.655
Playa Baracoa	2012	July	28.655
Playa Baracoa	2012	July	28.655
Playa Baracoa	2012	July	28.655
Playa Baracoa	2012	July	28.655
Playa Baracoa	2012	July	28.655
Playa Baracoa	2012	July	28.655
Playa Baracoa	2012	July	28.555
Playa Baracoa	2012	July	28.555
Playa Baracoa	2012	July	28.555
Playa Baracoa	2012	July	28.555
Playa Baracoa	2012	July	28.555
Playa Baracoa	2012	July	28.555
Playa Baracoa	2012	July	28.555
Playa Baracoa	2012	July	28.555
Playa Baracoa	2012	July	28.555
Playa Baracoa	2012	July	28.555
Playa Baracoa	2012	July	28.555
Playa Baracoa	2012	July	28.555
Playa Baracoa	2012	July	28.655
Playa Baracoa	2012	July	28.655
Playa Baracoa	2012	July	28.655
Playa Baracoa	2012	July	28.655
Playa Baracoa	2012	July	28.655
Playa Baracoa	2012	July	28.655
Playa Baracoa	2012	July	28.655
Playa Baracoa	2012	July	28.754
Playa Baracoa	2012	July	28.754
Playa Baracoa	2012	July	28.754
Playa Baracoa	2012	July	28.754
Playa Baracoa	2012	July	28.754
Playa Baracoa	2012	July	28.754
Playa Baracoa	2012	July	28.754
Playa Baracoa	2012	July	28.655
Playa Baracoa	2012	July	28.655
Playa Baracoa	2012	July	28.655
Playa Baracoa	2012	July	28.655
Playa Baracoa	2012	July	28.655
Playa Baracoa	2012	July	28.655
Playa Baracoa	2012	July	28.655
Playa Baracoa	2012	July	28.655
Playa Baracoa	2012	July	28.655
Playa Baracoa	2012	July	28.655
Playa Baracoa	2012	July	28.655
Playa Baracoa	2012	July	28.555
Playa Baracoa	2012	July	28.655
Playa Baracoa	2012	July	28.555
Playa Baracoa	2012	July	28.555
Playa Baracoa	2012	July	28.555
Playa Baracoa	2012	July	28.555
Playa Baracoa	2012	July	28.555
Playa Baracoa	2012	July	28.555
Playa Baracoa	2012	July	28.555
Playa Baracoa	2012	July	28.555
Playa Baracoa	2012	July	28.655
Playa Baracoa	2012	July	28.655
Playa Baracoa	2012	July	28.655
Playa Baracoa	2012	July	28.655
Playa Baracoa	2012	July	28.655
Playa Baracoa	2012	July	28.555
Playa Baracoa	2012	July	28.555
Playa Baracoa	2012	July	28.555
Playa Baracoa	2012	July	28.555
Playa Baracoa	2012	July	28.555
Playa Baracoa	2012	July	28.555
Playa Baracoa	2012	July	28.655
Playa Baracoa	2012	July	28.555
Playa Baracoa	2012	July	28.555
Playa Baracoa	2012	July	28.655
Playa Baracoa	2012	July	28.655
Playa Baracoa	2012	July	28.655
Playa Baracoa	2012	July	28.655
Playa Baracoa	2012	July	28.655
Playa Baracoa	2012	July	28.655
Playa Baracoa	2012	July	28.655
Playa Baracoa	2012	July	28.655
Playa Baracoa	2012	July	28.655
Playa Baracoa	2012	July	28.754
Playa Baracoa	2012	July	28.754
Playa Baracoa	2012	July	28.655
Playa Baracoa	2012	July	28.655
Playa Baracoa	2012	July	28.655
Playa Baracoa	2012	July	28.655
Playa Baracoa	2012	July	28.655
Playa Baracoa	2012	July	28.655
Playa Baracoa	2012	July	28.655
Playa Baracoa	2012	July	28.655
Playa Baracoa	2012	July	28.655
Playa Baracoa	2012	July	28.655
Playa Baracoa	2012	July	28.655
Playa Baracoa	2012	July	28.655
Playa Baracoa	2012	July	28.655
Playa Baracoa	2012	July	28.655
Playa Baracoa	2012	July	28.555
Playa Baracoa	2012	July	28.555
Playa Baracoa	2012	July	28.555
Playa Baracoa	2012	July	28.655
Playa Baracoa	2012	July	28.655
Playa Baracoa	2012	July	28.655
Playa Baracoa	2012	July	28.655
Playa Baracoa	2012	July	28.555
Playa Baracoa	2012	July	28.655
Playa Baracoa	2012	July	28.655
Playa Baracoa	2012	July	28.655
Playa Baracoa	2012	July	28.655
Playa Baracoa	2012	July	28.655
Playa Baracoa	2012	July	28.655
Playa Baracoa	2012	July	28.655
Playa Baracoa	2012	July	28.655
Playa Baracoa	2012	July	28.655
Playa Baracoa	2012	July	28.655
Playa Baracoa	2012	July	28.655
Playa Baracoa	2012	July	28.655
Playa Baracoa	2012	July	28.655
Playa Baracoa	2012	July	28.655
Playa Baracoa	2012	July	28.655
Playa Baracoa	2012	July	28.655
Playa Baracoa	2012	July	28.655
Playa Baracoa	2012	July	28.655
Playa Baracoa	2012	July	28.655
Playa Baracoa	2012	July	28.655
Playa Baracoa	2012	July	28.655
Playa Baracoa	2012	July	28.655
Playa Baracoa	2012	July	28.655
Playa Baracoa	2012	July	28.655
Playa Baracoa	2012	July	28.655
Playa Baracoa	2012	July	28.655
Playa Baracoa	2012	July	28.655
Playa Baracoa	2012	July	28.655
Playa Baracoa	2012	July	28.555
Playa Baracoa	2012	July	28.655
Playa Baracoa	2012	July	28.555
Playa Baracoa	2012	July	28.655
Playa Baracoa	2012	July	28.655
Playa Baracoa	2012	July	28.655
Playa Baracoa	2012	July	28.655
Playa Baracoa	2012	July	28.655
Playa Baracoa	2012	July	28.655
Playa Baracoa	2012	July	28.655
Playa Baracoa	2012	July	28.655
Playa Baracoa	2012	July	28.655
Playa Baracoa	2012	July	28.655
Playa Baracoa	2012	July	28.655
Playa Baracoa	2012	July	28.655
Playa Baracoa	2012	July	28.655
Playa Baracoa	2012	July	28.655
Playa Baracoa	2012	July	28.655
Playa Baracoa	2012	July	28.655
Playa Baracoa	2012	July	28.655
Playa Baracoa	2012	July	28.655
Playa Baracoa	2012	July	28.655
Playa Baracoa	2012	July	28.655
Playa Baracoa	2012	July	28.655
Playa Baracoa	2012	July	28.655
Playa Baracoa	2012	July	28.655
Playa Baracoa	2012	July	28.555
Playa Baracoa	2012	July	28.555
Playa Baracoa	2012	July	28.555
Playa Baracoa	2012	July	28.555
Playa Baracoa	2012	July	28.555
Playa Baracoa	2012	July	28.555
Playa Baracoa	2012	July	28.555
Playa Baracoa	2012	July	28.555
Playa Baracoa	2012	July	28.555
Playa Baracoa	2012	July	28.655
Playa Baracoa	2012	July	28.655
Playa Baracoa	2012	July	28.655
Playa Baracoa	2012	July	28.555
Playa Baracoa	2012	July	28.555
Playa Baracoa	2012	July	28.456
Playa Baracoa	2012	July	28.456
Playa Baracoa	2012	July	28.456
Playa Baracoa	2012	July	28.555
Playa Baracoa	2012	July	28.555
Playa Baracoa	2012	July	28.555
Playa Baracoa	2012	July	28.555
Playa Baracoa	2012	July	28.555
Playa Baracoa	2012	July	28.456
Playa Baracoa	2012	July	28.555
Playa Baracoa	2012	July	28.555
Playa Baracoa	2012	July	28.555
Playa Baracoa	2012	July	28.555
Playa Baracoa	2012	July	28.655
Playa Baracoa	2012	July	28.655
Playa Baracoa	2012	July	28.655
Playa Baracoa	2012	July	28.655
Playa Baracoa	2012	July	28.655
Playa Baracoa	2012	July	28.655
Playa Baracoa	2012	July	28.655
Playa Baracoa	2012	July	28.655
Playa Baracoa	2012	July	28.655
Playa Baracoa	2012	July	28.655
Playa Baracoa	2012	July	28.655
Playa Baracoa	2012	July	28.655
Playa Baracoa	2012	July	28.655
Playa Baracoa	2012	July	28.655
Playa Baracoa	2012	July	28.655
Playa Baracoa	2012	July	28.655
Playa Baracoa	2012	July	28.655
Playa Baracoa	2012	July	28.655
Playa Baracoa	2012	July	28.655
Playa Baracoa	2012	July	28.655
Playa Baracoa	2012	July	28.655
Playa Baracoa	2012	July	28.655
Playa Baracoa	2012	July	28.655
Playa Baracoa	2012	July	28.655
Playa Baracoa	2012	July	28.555
Playa Baracoa	2012	July	28.555
Playa Baracoa	2012	July	28.555
Playa Baracoa	2012	July	28.555
Playa Baracoa	2012	July	28.555
Playa Baracoa	2012	July	28.555
Playa Baracoa	2012	July	28.655
Playa Baracoa	2012	July	28.555
Playa Baracoa	2012	July	28.555
Playa Baracoa	2012	July	28.555
Playa Baracoa	2012	July	28.555
Playa Baracoa	2012	July	28.555
Playa Baracoa	2012	July	28.555
Playa Baracoa	2012	July	28.555
Playa Baracoa	2012	July	28.655
Playa Baracoa	2012	July	28.555
Playa Baracoa	2012	July	28.456
Playa Baracoa	2012	July	28.456
Playa Baracoa	2012	July	28.456
Playa Baracoa	2012	July	28.456
Playa Baracoa	2012	July	28.456
Playa Baracoa	2012	July	28.456
Playa Baracoa	2012	July	28.456
Playa Baracoa	2012	July	28.456
Playa Baracoa	2012	July	28.456
Playa Baracoa	2012	July	28.456
Playa Baracoa	2012	July	28.456
Playa Baracoa	2012	July	28.555
Playa Baracoa	2012	July	28.456
Playa Baracoa	2012	July	28.456
Playa Baracoa	2012	July	28.456
Playa Baracoa	2012	July	28.456
Playa Baracoa	2012	July	28.456
Playa Baracoa	2012	July	28.456
Playa Baracoa	2012	July	28.456
Playa Baracoa	2012	July	28.456
Playa Baracoa	2012	July	28.456
Playa Baracoa	2012	July	28.555
Playa Baracoa	2012	July	28.456
Playa Baracoa	2012	July	28.456
Playa Baracoa	2012	July	28.456
Playa Baracoa	2012	July	28.456
Playa Baracoa	2012	July	28.456
Playa Baracoa	2012	July	28.555
Playa Baracoa	2012	July	28.555
Playa Baracoa	2012	July	28.555
Playa Baracoa	2012	July	28.555
Playa Baracoa	2012	July	28.555
Playa Baracoa	2012	July	28.555
Playa Baracoa	2012	July	28.555
Playa Baracoa	2012	July	28.555
Playa Baracoa	2012	July	28.555
Playa Baracoa	2012	July	28.555
Playa Baracoa	2012	July	28.555
Playa Baracoa	2012	July	28.555
Playa Baracoa	2012	July	28.555
Playa Baracoa	2012	July	28.555
Playa Baracoa	2012	July	28.456
Playa Baracoa	2012	July	28.555
Playa Baracoa	2012	July	28.555
Playa Baracoa	2012	July	28.555
Playa Baracoa	2012	July	28.456
Playa Baracoa	2012	July	28.456
Playa Baracoa	2012	July	28.357
Playa Baracoa	2012	July	28.357
Playa Baracoa	2012	July	28.357
Playa Baracoa	2012	July	28.258
Playa Baracoa	2012	July	28.258
Playa Baracoa	2012	July	28.258
Playa Baracoa	2012	July	28.258
Playa Baracoa	2012	July	28.357
Playa Baracoa	2012	July	28.357
Playa Baracoa	2012	July	28.357
Playa Baracoa	2012	July	28.357
Playa Baracoa	2012	July	28.456
Playa Baracoa	2012	July	28.456
Playa Baracoa	2012	July	28.456
Playa Baracoa	2012	July	28.456
Playa Baracoa	2012	July	28.456
Playa Baracoa	2012	July	28.456
Playa Baracoa	2012	July	28.555
Playa Baracoa	2012	July	28.555
Playa Baracoa	2012	July	28.456
Playa Baracoa	2012	July	28.456
Playa Baracoa	2012	July	28.456
Playa Baracoa	2012	July	28.456
Playa Baracoa	2012	July	28.456
Playa Baracoa	2012	July	28.555
Playa Baracoa	2012	July	28.456
Playa Baracoa	2012	July	28.456
Playa Baracoa	2012	July	28.555
Playa Baracoa	2012	July	28.555
Playa Baracoa	2012	July	28.555
Playa Baracoa	2012	July	28.555
Playa Baracoa	2012	July	28.555
Playa Baracoa	2012	July	28.555
Playa Baracoa	2012	July	28.555
Playa Baracoa	2012	July	28.555
Playa Baracoa	2012	July	28.555
Playa Baracoa	2012	July	28.555
Playa Baracoa	2012	July	28.456
Playa Baracoa	2012	July	28.456
Playa Baracoa	2012	July	28.456
Playa Baracoa	2012	July	28.456
Playa Baracoa	2012	July	28.456
Playa Baracoa	2012	July	28.357
Playa Baracoa	2012	July	28.456
Playa Baracoa	2012	July	28.456
Playa Baracoa	2012	July	28.456
Playa Baracoa	2012	July	28.456
Playa Baracoa	2012	July	28.357
Playa Baracoa	2012	July	28.357
Playa Baracoa	2012	July	28.357
Playa Baracoa	2012	July	28.357
Playa Baracoa	2012	July	28.357
Playa Baracoa	2012	July	28.357
Playa Baracoa	2012	July	28.456
Playa Baracoa	2012	July	28.456
Playa Baracoa	2012	July	28.456
Playa Baracoa	2012	July	28.456
Playa Baracoa	2012	July	28.456
Playa Baracoa	2012	July	28.456
Playa Baracoa	2012	July	28.456
Playa Baracoa	2012	July	28.456
Playa Baracoa	2012	July	28.555
Playa Baracoa	2012	July	28.555
Playa Baracoa	2012	July	28.555
Playa Baracoa	2012	July	28.555
Playa Baracoa	2012	July	28.555
Playa Baracoa	2012	July	28.555
Playa Baracoa	2012	July	28.555
Playa Baracoa	2012	July	28.555
Playa Baracoa	2012	July	28.555
Playa Baracoa	2012	July	28.555
Playa Baracoa	2012	July	28.555
Playa Baracoa	2012	July	28.555
Playa Baracoa	2012	July	28.555
Playa Baracoa	2012	July	28.555
Playa Baracoa	2012	July	28.555
Playa Baracoa	2012	July	28.555
Playa Baracoa	2012	July	28.555
Playa Baracoa	2012	July	28.555
Playa Baracoa	2012	July	28.555
Playa Baracoa	2012	July	28.555
Playa Baracoa	2012	July	28.555
Playa Baracoa	2012	July	28.456
Playa Baracoa	2012	July	28.456
Playa Baracoa	2012	July	28.456
Playa Baracoa	2012	July	28.357
Playa Baracoa	2012	July	28.456
Playa Baracoa	2012	July	28.456
Playa Baracoa	2012	July	28.555
Playa Baracoa	2012	July	28.555
Playa Baracoa	2012	July	28.555
Playa Baracoa	2012	July	28.555
Playa Baracoa	2012	July	28.555
Playa Baracoa	2012	July	28.555
Playa Baracoa	2012	July	28.555
Playa Baracoa	2012	July	28.555
Playa Baracoa	2012	July	28.456
Playa Baracoa	2012	July	28.258
Playa Baracoa	2012	July	28.258
Playa Baracoa	2012	July	28.159
Playa Baracoa	2012	July	28.159
Playa Baracoa	2012	July	28.159
Playa Baracoa	2012	July	28.258
Playa Baracoa	2012	July	28.258
Playa Baracoa	2012	July	28.258
Playa Baracoa	2012	July	28.258
Playa Baracoa	2012	July	28.258
Playa Baracoa	2012	July	28.258
Playa Baracoa	2012	July	28.258
Playa Baracoa	2012	July	28.258
Playa Baracoa	2012	July	28.357
Playa Baracoa	2012	July	28.357
Playa Baracoa	2012	July	28.357
Playa Baracoa	2012	July	28.357
Playa Baracoa	2012	July	28.357
Playa Baracoa	2012	July	28.159
Playa Baracoa	2012	July	28.159
Playa Baracoa	2012	July	28.258
Playa Baracoa	2012	July	28.258
Playa Baracoa	2012	July	28.258
Playa Baracoa	2012	July	28.357
Playa Baracoa	2012	July	28.357
Playa Baracoa	2012	July	28.456
Playa Baracoa	2012	July	28.456
Playa Baracoa	2012	July	28.456
Playa Baracoa	2012	July	28.456
Playa Baracoa	2012	July	28.456
Playa Baracoa	2012	July	28.456
Playa Baracoa	2012	July	28.456
Playa Baracoa	2012	July	28.456
Playa Baracoa	2012	July	28.456
Playa Baracoa	2012	July	28.456
Playa Baracoa	2012	July	28.456
Playa Baracoa	2012	July	28.357
Playa Baracoa	2012	July	28.159
Playa Baracoa	2012	July	28.06
Playa Baracoa	2012	July	28.06
Playa Baracoa	2012	July	28.06
Playa Baracoa	2012	July	28.06
Playa Baracoa	2012	July	28.06
Playa Baracoa	2012	July	28.06
Playa Baracoa	2012	July	28.06
Playa Baracoa	2012	July	27.961
Playa Baracoa	2012	July	27.961
Playa Baracoa	2012	July	28.06
Playa Baracoa	2012	July	28.06
Playa Baracoa	2012	July	27.961
Playa Baracoa	2012	July	27.961
Playa Baracoa	2012	July	27.961
Playa Baracoa	2012	July	27.961
Playa Baracoa	2012	July	27.961
Playa Baracoa	2012	July	27.961
Playa Baracoa	2012	July	27.961
Playa Baracoa	2012	July	27.961
Playa Baracoa	2012	July	27.961
Playa Baracoa	2012	July	28.06
Playa Baracoa	2012	July	28.06
Playa Baracoa	2012	July	28.06
Playa Baracoa	2012	July	28.06
Playa Baracoa	2012	July	28.06
Playa Baracoa	2012	July	28.06
Playa Baracoa	2012	July	28.159
Playa Baracoa	2012	July	28.159
Playa Baracoa	2012	July	28.159
Playa Baracoa	2012	July	28.159
Playa Baracoa	2012	July	28.159
Playa Baracoa	2012	July	28.258
Playa Baracoa	2012	July	28.258
Playa Baracoa	2012	July	28.258
Playa Baracoa	2012	July	28.357
Playa Baracoa	2012	July	28.258
Playa Baracoa	2012	July	28.258
Playa Baracoa	2012	July	28.258
Playa Baracoa	2012	July	28.258
Playa Baracoa	2012	July	28.159
Playa Baracoa	2012	July	28.258
Playa Baracoa	2012	July	28.258
Playa Baracoa	2012	July	28.258
Playa Baracoa	2012	July	28.258
Playa Baracoa	2012	July	28.357
Playa Baracoa	2012	July	28.357
Playa Baracoa	2012	July	28.258
Playa Baracoa	2012	July	28.159
Playa Baracoa	2012	July	28.159
Playa Baracoa	2012	July	28.159
Playa Baracoa	2012	July	28.258
Playa Baracoa	2012	July	28.258
Playa Baracoa	2012	July	28.258
Playa Baracoa	2012	July	28.357
Playa Baracoa	2012	July	28.357
Playa Baracoa	2012	July	28.258
Playa Baracoa	2012	July	28.258
Playa Baracoa	2012	July	28.258
Playa Baracoa	2012	July	28.357
Playa Baracoa	2012	July	28.357
Playa Baracoa	2012	July	28.357
Playa Baracoa	2012	July	28.258
Playa Baracoa	2012	July	28.06
Playa Baracoa	2012	July	28.06
Playa Baracoa	2012	July	28.06
Playa Baracoa	2012	July	28.06
Playa Baracoa	2012	July	28.159
Playa Baracoa	2012	July	28.159
Playa Baracoa	2012	July	28.159
Playa Baracoa	2012	July	28.159
Playa Baracoa	2012	July	28.06
Playa Baracoa	2012	July	28.06
Playa Baracoa	2012	July	28.06
Playa Baracoa	2012	July	28.06
Playa Baracoa	2012	July	28.06
Playa Baracoa	2012	July	28.159
Playa Baracoa	2012	July	28.258
Playa Baracoa	2012	July	28.258
Playa Baracoa	2012	July	28.258
Playa Baracoa	2012	July	28.258
Playa Baracoa	2012	July	28.357
Playa Baracoa	2012	July	28.357
Playa Baracoa	2012	July	28.357
Playa Baracoa	2012	July	28.357
Playa Baracoa	2012	July	28.357
Playa Baracoa	2012	July	28.456
Playa Baracoa	2012	July	28.456
Playa Baracoa	2012	July	28.456
Playa Baracoa	2012	July	28.456
Playa Baracoa	2012	July	28.456
Playa Baracoa	2012	July	28.456
Playa Baracoa	2012	July	28.456
Playa Baracoa	2012	July	28.456
Playa Baracoa	2012	July	28.357
Playa Baracoa	2012	July	28.456
Playa Baracoa	2012	July	28.456
Playa Baracoa	2012	July	28.357
Playa Baracoa	2012	July	28.456
Playa Baracoa	2012	July	28.456
Playa Baracoa	2012	July	28.456
Playa Baracoa	2012	July	28.357
Playa Baracoa	2012	July	28.357
Playa Baracoa	2012	July	28.456
Playa Baracoa	2012	July	28.258
[truncated: 169,335 more rows]
